# Supplementary material
Source: publisher site journal article supplement (https://www.dovepress.com/article/346416)
Supplement: Supplementary file 1 [file get_supplementary_file.php]

Table S1

| gene_symbol | 1M         |           | 2M       |           | 6M       |          | 12M      |           | 20M      |         |
|-------------|------------|-----------|----------|-----------|----------|----------|----------|-----------|----------|---------|
|             | MEAN       | SD        | MEAN     | SD        | MEAN     | SD       | MEAN     | SD        | MEAN     | SD      |
| Yars        | 31.3633333 | 3.2407149 | 26.694   | 3.754994  | 26.126   | 3.754521 | 22.4275  | 4.5989229 | 22.22    | 2.65814 |
| Lgals7      | 6932.91333 | 676.52725 | 5679.468 | 347.61355 | 5201.794 | 268.8174 | 4561.25  | 508.48478 | 4010.034 | 873.648 |
| Pank1       | 18.6666667 | 3.1090245 | 16.612   | 2.8575724 | 15.086   | 2.443405 | 14.76    | 3.9470242 | 14.732   | 4.79134 |
| Kyat1       | 42.4733333 | 6.6222755 | 37.538   | 2.6251419 | 34.18    | 2.388964 | 33.61    | 2.0276259 | 31.336   | 3.09227 |
| Eif4e2      | 50.8133333 | 3.4672804 | 45.854   | 3.4732233 | 42.89    | 3.019818 | 42.255   | 2.8342842 | 37.75    | 3.02583 |
| Carmil2     | 0.58666667 | 0.211266  | 0.488    | 0.1810249 | 0.486    | 0.06269  | 0.4025   | 0.1203813 | 0.38     | 0.07211 |
| Psm12       | 55.95      | 4.0475301 | 54.902   | 6.0597665 | 54.76    | 4.831904 | 54.43    | 9.5279659 | 49.764   | 4.48979 |
| Spink7      | 4.52       | 3.3270407 | 2.812    | 0.6007662 | 2.772    | 2.133675 | 1.08     | 0.5210246 | 0.482    | 0.30833 |
| Psmg3       | 18.1233333 | 1.3349282 | 16.032   | 1.9700305 | 15.852   | 1.343678 | 15.2525  | 3.3944698 | 14.324   | 2.08356 |
| Cmc2        | 9.14       | 1.9686798 | 8.446    | 0.7852261 | 8.252    | 0.996429 | 6.9      | 0.8287742 | 5.722    | 0.71142 |
| Pxmp4       | 101.8      | 4.9390181 | 81.098   | 18.588894 | 76.466   | 12.72192 | 69.6     | 10.734539 | 56.906   | 16.8264 |
| Cyp4f39     | 94.26      | 2.6486412 | 79.318   | 4.1673697 | 71.396   | 10.22028 | 60.915   | 3.0954752 | 59.838   | 4.54346 |
| Gstal       | 9.35       | 2.5484897 | 8.17     | 2.6107279 | 6.408    | 2.960637 | 5.9325   | 0.9776971 | 3.686    | 0.95811 |
| Hars        | 84.7333333 | 0.5616345 | 82.032   | 11.56265  | 75.426   | 5.410423 | 72.175   | 10.476362 | 70.27    | 8.3036  |
| Elob        | 267.323333 | 16.147697 | 265.726  | 15.530378 | 255.608  | 22.61847 | 235.2575 | 11.203057 | 207.878  | 17.4401 |
| Vps36       | 38.07      | 3.9237355 | 36.17    | 2.1509068 | 35.044   | 1.785548 | 29.7875  | 1.5985905 | 28.422   | 1.10251 |
| Bambi       | 0.80333333 | 0.193477  | 0.724    | 0.2317973 | 0.702    | 0.118195 | 0.6925   | 0.1647979 | 0.538    | 0.16453 |
| Polr2l      | 39.44      | 2.940017  | 36.95    | 3.3189306 | 34.058   | 2.61279  | 33.99    | 3.9790535 | 26.526   | 3.72132 |
| Taf9        | 58.6433333 | 8.8507928 | 57.022   | 4.4242028 | 56.514   | 5.10478  | 56.4075  | 7.7226134 | 51.142   | 5.27571 |
| Atp6v0e     | 180.216667 | 5.1606621 | 172.978  | 8.5805023 | 166.168  | 10.69757 | 164.92   | 10.535923 | 141.21   | 8.0571  |
| Haus8       | 8.07       | 0.5663038 | 7.784    | 1.0888664 | 6.894    | 1.64415  | 5.7575   | 0.4083605 | 5.65     | 0.89811 |
| Ttc22       | 13.9933333 | 1.2506532 | 11.336   | 0.9941982 | 10.95    | 0.845843 | 9.535    | 1.4101655 | 9.462    | 1.10042 |
| Slc2a6      | 2.88       | 0.2778489 | 2.87     | 0.6045246 | 2.666    | 0.438953 | 2.6125   | 0.6411643 | 2.52     | 0.33294 |
| Tomm6       | 185.15     | 14.584536 | 141.814  | 7.8015242 | 132.84   | 13.73353 | 129.625  | 14.918207 | 122.066  | 11.9821 |
| Cybrd1      | 0.66666667 | 0.0680686 | 0.546    | 0.184201  | 0.432    | 0.115195 | 0.3425   | 0.1155783 | 0.324    | 0.10237 |
| Aadacl4     | 18.8866667 | 5.231676  | 13.872   | 5.2493971 | 13.412   | 6.614765 | 11.4825  | 5.4636153 | 10.946   | 7.84986 |
| Eif2b1      | 28.34      | 2.0648729 | 25.694   | 1.1490561 | 23.966   | 1.349326 | 22.6475  | 3.127058  | 21.046   | 1.2077  |
| Tbc1d10a    | 42.2933333 | 6.7271267 | 37.898   | 1.2006956 | 37.274   | 2.001282 | 36.69    | 1.5373787 | 35.746   | 3.85897 |
| Lpar5       | 10.6633333 | 1.6405588 | 10.078   | 0.8741396 | 9.748    | 0.603755 | 9.625    | 0.688888  | 9.604    | 1.11538 |
| Ube2s       | 129.44     | 12.836078 | 124.664  | 13.495071 | 108.118  | 15.29019 | 96.9925  | 8.9441988 | 90.894   | 7.76595 |
| Atp5b       | 550.566667 | 20.478919 | 534.712  | 51.783894 | 524.93   | 34.16605 | 517.7025 | 47.045655 | 430.63   | 25.1101 |
| Sntal       | 6.02       | 1.1554653 | 5.244    | 1.4356462 | 5.082    | 0.789823 | 5.055    | 0.1973998 | 4.244    | 0.7945  |
| Rdh12       | 91.1166667 | 2.2805774 | 78.54    | 4.8463595 | 71.858   | 5.452015 | 65.12    | 1.4676058 | 62.654   | 2.90512 |
| Cks1b       | 34.9066667 | 1.0715565 | 33.104   | 3.9119343 | 31.92    | 3.340037 | 30.4375  | 4.1585524 | 25.506   | 3.53337 |
| Col1a1      | 143.81     | 52.683782 | 100.042  | 45.399123 | 60.206   | 38.34848 | 44.615   | 8.9695206 | 31.504   | 10.3444 |
| Hist3h2ba   | 2.05666667 | 0.4775284 | 1.442    | 0.4596956 | 1.196    | 0.345948 | 0.9175   | 0.312983  | 0.89     | 0.33978 |
| St3gal4     | 11.2766667 | 2.1003889 | 11.016   | 1.8786378 | 10.494   | 1.586342 | 9.79     | 2.8255501 | 9.514    | 1.03408 |
| C1qtnf6     | 5.84       | 1.6245307 | 2.49     | 0.90678   | 2.41     | 0.642417 | 1.6625   | 0.2348581 | 1.444    | 0.39291 |
| Teddm3      | 63.3       | 4.5086694 | 48.2     | 13.242118 | 44.432   | 8.170531 | 43.3     | 12.846403 | 35.74    | 10.3515 |
| Col4a3      | 0.56666667 | 0.140119  | 0.452    | 0.1331165 | 0.204    | 0.026077 | 0.1875   | 0.060208  | 0.16     | 0.07176 |
| Gpr89       | 11.8633333 | 0.9091388 | 11.694   | 1.3056531 | 11.166   | 0.742987 | 10.8525  | 0.6264916 | 9.598    | 0.53616 |
| Atp5o       | 249.77     | 6.3606682 | 244.012  | 15.266806 | 237.432  | 6.327114 | 214.735  | 11.649931 | 213.568  | 9.40478 |
| Far2        | 204.213333 | 39.014736 | 200.2    | 58.638809 | 131.634  | 45.82524 | 126.49   | 53.796293 | 115.194  | 59.6926 |
| Ccnd3       | 44.18      | 4.8210787 | 42.614   | 3.1443648 | 41.038   | 5.220361 | 36.3225  | 1.9880707 | 33.85    | 1.22833 |

|           |            |           |          |           |          |          |          |           |          |         |
|-----------|------------|-----------|----------|-----------|----------|----------|----------|-----------|----------|---------|
| Ppal      | 82.9666667 | 7.4030422 | 78.798   | 11.725002 | 75.526   | 9.8072   | 74.4425  | 22.784939 | 53.96    | 7.11739 |
| Slc25a5   | 403.92     | 23.048521 | 373.638  | 37.613826 | 365.29   | 26.21902 | 348.7325 | 34.245124 | 310.762  | 16.7772 |
| Nrbp1     | 65.55      | 1.25008   | 65.21    | 3.0883248 | 65.012   | 2.447012 | 63.9625  | 2.3436919 | 58.7     | 3.69762 |
| Foxe1     | 0.92333333 | 0.5063925 | 0.242    | 0.129499  | 0.232    | 0.241702 | 0.225    | 0.1206924 | 0.136    | 0.10922 |
| Malsu1    | 16.68      | 0.7275301 | 14.352   | 0.960401  | 14.246   | 1.358632 | 14.18    | 2.1471532 | 13.564   | 0.5611  |
| Urod      | 37.9533333 | 3.8654538 | 35.22    | 4.0361306 | 33.396   | 2.182345 | 33.0475  | 3.1315212 | 28.024   | 4.81124 |
| Rpl7a     | 1362.78667 | 87.423976 | 1353.986 | 30.02881  | 1316.346 | 53.47214 | 1287.105 | 101.59014 | 1233.052 | 72.5838 |
| Mcat      | 7.06333333 | 0.9042308 | 6.912    | 0.8897865 | 6.636    | 0.580327 | 6.6      | 0.2369247 | 6.112    | 0.67218 |
| Fabp5     | 1246.34667 | 40.513871 | 1035.228 | 132.90417 | 917.972  | 128.3475 | 700.315  | 123.75452 | 639.646  | 87.1267 |
| Agl       | 3.93       | 0.2851315 | 3.254    | 0.3691612 | 3.182    | 0.626434 | 3.17     | 0.518009  | 3.064    | 0.79419 |
| Tarbp2    | 22.6933333 | 1.6132679 | 21.85    | 1.8680739 | 21.594   | 1.132179 | 21.2     | 2.1044873 | 18.92    | 2.29923 |
| Edc3      | 12.0433333 | 0.5781292 | 11.372   | 0.6125112 | 10.966   | 0.279428 | 10.6925  | 0.3456757 | 10.054   | 0.77726 |
| Hist1h2bc | 61.9666667 | 8.6859791 | 60.912   | 7.5022843 | 34.604   | 4.835766 | 33.91    | 2.5445759 | 29.182   | 2.03768 |
| Fam84a    | 79.9933333 | 2.3849598 | 68.826   | 4.505389  | 68.284   | 8.426674 | 62.215   | 8.4989039 | 61.132   | 1.11439 |
| Sult2b1   | 181.8      | 18.452935 | 161.304  | 17.312781 | 139.516  | 20.00165 | 116.4775 | 18.884703 | 111.774  | 21.8372 |
| Mecr      | 20.88      | 0.5384236 | 19.744   | 1.6637398 | 18.618   | 1.016105 | 18.0525  | 2.0719295 | 17.548   | 1.34732 |
| Gadd45g   | 11.44      | 1.9927619 | 9.55     | 2.6966739 | 9.364    | 1.913891 | 9.2025   | 2.3967669 | 7.022    | 1.77288 |
| Brwd3     | 2.1        | 0.6091798 | 2.014    | 0.1277889 | 1.972    | 0.389962 | 1.93     | 0.2398611 | 1.906    | 0.38253 |
| Uchl3     | 82.66      | 11.061356 | 78.014   | 9.0525096 | 75.16    | 13.78118 | 64.055   | 17.725625 | 61.162   | 4.80979 |
| D11Wsu47e | 3.40333333 | 0.2983845 | 3.316    | 0.7339823 | 3.194    | 0.517958 | 2.89     | 0.3349627 | 2.78     | 0.42667 |
| Pa2g4     | 172.103333 | 10.325969 | 161.504  | 18.326435 | 150      | 10.94032 | 149.8825 | 18.37531  | 147.732  | 14.7545 |
| Chchd10   | 37.2833333 | 1.4059279 | 33.746   | 5.014133  | 27.084   | 4.14687  | 23.6875  | 6.0269969 | 20.952   | 6.06696 |
| S100z     | 0.60333333 | 0.5310681 | 0.392    | 0.362174  | 0.316    | 0.224121 | 0.24     | 0.3645088 | 0.08     | 0.17889 |
| Agpat3    | 73.3066667 | 5.2802683 | 66.382   | 7.9103963 | 61.494   | 4.64247  | 58.235   | 4.2727392 | 55.04    | 4.39555 |
| Aars      | 33.58      | 5.8102754 | 29.576   | 4.2534609 | 28.264   | 5.029461 | 25.155   | 4.5639201 | 22.976   | 3.25846 |
| Pdss2     | 4.54       | 0.7888599 | 3.41     | 0.7508995 | 3.254    | 0.301712 | 3.1175   | 0.3981938 | 2.77     | 0.55664 |
| Hnrnpab   | 211.326667 | 9.1721989 | 206.678  | 16.348684 | 205.276  | 16.04764 | 203.86   | 22.832721 | 191.412  | 22.5567 |
| Adamts19  | 0.90333333 | 0.2294196 | 0.21     | 0.0943398 | 0.194    | 0.184201 | 0.095    | 0.043589  | 0.092    | 0.04604 |
| Hnrnpl    | 138.913333 | 10.30057  | 129.892  | 6.182032  | 127.734  | 3.143713 | 127.405  | 5.4071835 | 119.448  | 8.49474 |
| Unc119b   | 12.49      | 1.1230761 | 11.944   | 1.7566531 | 11.474   | 1.517706 | 10.6275  | 0.8850377 | 9.878    | 1.15225 |
| Gps1      | 45.97      | 0.5566866 | 44.238   | 2.499734  | 44.078   | 2.983055 | 43.24    | 3.9934697 | 42.934   | 2.95438 |
| Tmem79    | 91.5833333 | 10.6501   | 85.518   | 3.3045454 | 77.462   | 4.45244  | 75.625   | 5.9896383 | 75.156   | 8.86699 |
| Hsd17b4   | 42.63      | 2.5259454 | 41.712   | 5.9766939 | 41.434   | 3.369055 | 39.91    | 5.2561012 | 36.148   | 7.84858 |
| Selenoh   | 39.6366667 | 4.456729  | 38.842   | 5.2352717 | 29.828   | 3.670112 | 29.585   | 1.1172735 | 26.23    | 4.24372 |
| Vcp       | 169.5      | 2.1210611 | 163.106  | 12.613351 | 155.954  | 7.067933 | 144.545  | 8.3644267 | 144.496  | 6.50855 |
| Hoxc13    | 10.15      | 1.4839474 | 6.922    | 1.652489  | 6.874    | 2.042885 | 6.7475   | 1.0214818 | 5.946    | 1.32762 |
| Ddx39     | 49.8366667 | 3.1261691 | 49.456   | 8.0129913 | 48.02    | 5.844181 | 44.3375  | 10.825453 | 40.1     | 7.43016 |
| Cks2      | 37.7833333 | 5.389632  | 36.532   | 8.2759332 | 30.122   | 2.463487 | 27.935   | 4.4384494 | 27.124   | 0.93698 |
| Chac1     | 5.76333333 | 0.7579138 | 5.352    | 0.7353367 | 5.02     | 0.463303 | 4.18     | 0.8360223 | 3.788    | 0.3936  |
| Sparc     | 346.226667 | 74.937861 | 247.53   | 91.768948 | 182.058  | 71.87741 | 145.305  | 6.8832575 | 125.61   | 23.8843 |
| Dohh      | 40.2466667 | 2.6595927 | 39.858   | 1.4429553 | 37.752   | 1.874279 | 36.87    | 3.6700681 | 33.786   | 4.34217 |
| Cox6a1    | 567.953333 | 27.912568 | 530.952  | 22.335928 | 456.186  | 30.84011 | 438.1125 | 21.186531 | 373.492  | 27.4657 |
| Colla2    | 79.17      | 25.421682 | 72.106   | 31.297037 | 42.288   | 25.20978 | 35.985   | 6.4685315 | 30.752   | 13.2445 |
| Cyren     | 2.51333333 | 0.4225321 | 2.356    | 0.5023246 | 2.28     | 0.535023 | 2.2275   | 0.2206619 | 2.136    | 0.62256 |
| Hax1      | 48.12      | 1.1580587 | 48.118   | 5.8475568 | 47       | 5.65399  | 45.685   | 5.4979178 | 37.286   | 2.8179  |
| Gstm7     | 2.03       | 0.291376  | 1.422    | 0.423816  | 0.924    | 0.461768 | 0.9075   | 0.4540466 | 0.738    | 0.1436  |
| Sin3b     | 45.2       | 3.42      | 43.888   | 2.5455982 | 39.82    | 1.991733 | 39.665   | 4.1665853 | 39.572   | 2.5121  |

|              |            |           |         |           |         |          |          |           |         |         |
|--------------|------------|-----------|---------|-----------|---------|----------|----------|-----------|---------|---------|
| Nt5e         | 12.94      | 0.9693812 | 12.694  | 1.9497384 | 11.542  | 2.083247 | 11.4975  | 1.6229474 | 11.212  | 2.79844 |
| Ttr          | 4.97       | 0.4951767 | 4.558   | 1.0238506 | 4.042   | 0.899094 | 3.2175   | 1.8887981 | 2.002   | 0.53308 |
| Snx3         | 132.11     | 9.3665522 | 124.072 | 6.8265709 | 120.572 | 9.033788 | 117.9075 | 6.0486383 | 112.654 | 2.17691 |
| Acox1        | 22.9666667 | 3.1401645 | 10.342  | 2.8681039 | 6.728   | 1.857975 | 6.5025   | 1.941432  | 6.092   | 1.77594 |
| Col4a1       | 15.9333333 | 1.9467237 | 15.758  | 3.9887492 | 15.128  | 3.079005 | 14.2225  | 3.2210389 | 10.552  | 3.76401 |
| Tuba4a       | 308.8      | 14.155363 | 293.336 | 38.905291 | 283.716 | 25.68775 | 262.15   | 53.440606 | 230.82  | 37.6002 |
| Kcnj12       | 1.07       | 0.2505993 | 0.454   | 0.1217785 | 0.29    | 0.05244  | 0.2575   | 0.1043631 | 0.18    | 0.05523 |
| Fgf21        | 0.53666667 | 0.1234234 | 0.262   | 0.2081346 | 0.238   | 0.104738 | 0.175    | 0.1008299 | 0.132   | 0.09859 |
| Cisd1        | 68.18      | 7.5245465 | 60.598  | 12.687404 | 54.508  | 11.0218  | 50.87    | 9.4884456 | 46.26   | 10.0486 |
| Lap3         | 56.23      | 6.6910612 | 46.678  | 8.0611519 | 38.064  | 7.661376 | 37.21    | 9.5479457 | 34.962  | 9.83664 |
| Ttc39c       | 10.9033333 | 0.4310839 | 10.506  | 0.5921402 | 10.116  | 0.298965 | 9.9575   | 0.7180239 | 9.176   | 0.53547 |
| Pbk          | 12.7833333 | 2.5501046 | 12.05   | 2.570107  | 11.35   | 2.232879 | 9.295    | 1.3546094 | 8.944   | 1.82436 |
| Ebp          | 63.0333333 | 0.9372477 | 55.444  | 4.3068933 | 49.796  | 3.27151  | 48.17    | 1.8902381 | 45.316  | 3.20534 |
| Cryzl2       | 5.12       | 0.5237366 | 3.79    | 0.4865696 | 3.002   | 0.473413 | 2.595    | 0.4228869 | 2.244   | 0.25861 |
| Lsm2         | 40.7466667 | 2.0977448 | 40.428  | 3.9528433 | 36.332  | 4.467188 | 35.235   | 2.6970416 | 33.8    | 4.11912 |
| Hmcn1        | 1.71666667 | 0.3271595 | 1.654   | 0.452471  | 1.1     | 0.373698 | 1.0825   | 0.2754844 | 0.874   | 0.18008 |
| Tars         | 40.97      | 1.0859558 | 39.278  | 5.5329531 | 39.232  | 5.23286  | 38.245   | 8.7533974 | 33.97   | 2.94892 |
| Nasp         | 33.0033333 | 5.6022704 | 32.082  | 2.9502746 | 29.956  | 2.905534 | 29.815   | 3.841688  | 28.57   | 4.71784 |
| Acot1        | 58.19      | 3.3400449 | 49.27   | 10.654947 | 41.71   | 6.99711  | 40.775   | 3.0589813 | 29.438  | 6.36673 |
| C9orf72      | 4.82666667 | 0.6666583 | 4.462   | 0.5432495 | 4.34    | 0.392747 | 4.195    | 0.4407947 | 4.006   | 0.83053 |
| Hnrnpm       | 75.3       | 4.5235716 | 75.294  | 6.153087  | 71.892  | 4.426282 | 71.035   | 3.1342463 | 69.292  | 4.55013 |
| Pex11a       | 16.2566667 | 3.2819557 | 15.864  | 2.9422576 | 13.852  | 1.557617 | 13.435   | 2.1443647 | 11.63   | 3.95987 |
| Eif3b        | 120.943333 | 7.2906881 | 118.884 | 12.109357 | 116.87  | 5.392193 | 116.0225 | 15.911707 | 106.872 | 10.9102 |
| Rita1        | 5.64       | 1.0450359 | 5.626   | 0.6066548 | 5.048   | 0.50067  | 4.8375   | 0.7189518 | 4.71    | 0.25367 |
| Metrl        | 34.1433333 | 2.6455686 | 31.066  | 2.3540773 | 30.772  | 2.191716 | 27.285   | 1.287517  | 25.256  | 1.47925 |
| Cdkn2d       | 16.2933333 | 3.4185572 | 15.392  | 1.6806308 | 13.374  | 0.921835 | 12.9375  | 0.741367  | 11.674  | 0.76846 |
| Prkcs        | 47.4533333 | 4.0779938 | 43.78   | 2.6083424 | 38.596  | 2.136523 | 38.5525  | 1.6184844 | 37.49   | 3.5611  |
| 0610009B22Ri | 19.22      | 1.8571214 | 18.112  | 0.5944073 | 17.574  | 1.404592 | 17.15    | 0.5854343 | 16.124  | 1.61106 |
| Nudt5        | 22.3333333 | 1.9830868 | 19.736  | 2.4825853 | 18.552  | 3.448053 | 17.0675  | 2.1447203 | 15.636  | 1.38146 |
| Atg101       | 25.0833333 | 2.1864202 | 20.478  | 1.4210806 | 19.678  | 0.78808  | 19.5875  | 0.7202488 | 18.096  | 1.94278 |
| 1700102P08Ri | 0.89666667 | 0.080829  | 0.83    | 0.2579729 | 0.806   | 0.225011 | 0.74     | 0.2393045 | 0.72    | 0.26796 |
| Mrpl57       | 14.7733333 | 1.1643167 | 14.466  | 0.5464247 | 13.22   | 0.608194 | 13.03    | 2.2315615 | 10.558  | 1.13142 |
| Wdr83os      | 128.17     | 8.3360662 | 117.858 | 11.252709 | 106.43  | 8.943011 | 100.4925 | 7.0639619 | 94.094  | 11.6291 |
| Nhp2         | 155.306667 | 9.3810945 | 153.138 | 13.372272 | 131.436 | 9.47935  | 128.1425 | 23.668373 | 103.558 | 16.8995 |
| Nt5dc2       | 39.3866667 | 3.5249019 | 31.938  | 3.7969751 | 29.852  | 1.670964 | 27.155   | 4.0021869 | 22.26   | 3.86862 |
| Eif3g        | 139.106667 | 3.626325  | 136.382 | 8.8568008 | 133.542 | 8.046295 | 131.645  | 16.512033 | 122.828 | 12.6717 |
| Tmem208      | 40.4566667 | 1.5393938 | 38.78   | 3.1502222 | 37.302  | 1.727924 | 35.31    | 5.0205909 | 33.992  | 1.99056 |
| Ngdn         | 26.8433333 | 1.130236  | 26.704  | 2.6012555 | 25.988  | 1.908237 | 22.68    | 3.5480793 | 22.32   | 1.70166 |
| Ctsd         | 765.66     | 58.487869 | 598.702 | 65.727095 | 550.286 | 56.76742 | 534.64   | 44.002411 | 502.676 | 21.9361 |
| Dolk         | 11.77      | 0.9566086 | 10.078  | 2.1466183 | 9.654   | 0.617438 | 9.5875   | 0.8899953 | 8.224   | 1.37081 |
| Ahcy         | 25.6866667 | 0.4130779 | 24.416  | 4.1426899 | 23.916  | 3.698774 | 17.99    | 2.7419215 | 17.784  | 2.33969 |
| Cldn10       | 1.29333333 | 0.1040833 | 3.08    | 0.6870226 | 3.834   | 1.278292 | 4.1675   | 0.3488433 | 4.396   | 1.32862 |
| Ms4a4d       | 0.37333333 | 0.1386843 | 1.46    | 0.4339931 | 2.064   | 0.509539 | 2.395    | 0.6080844 | 3.022   | 1.57289 |
| Aebp1        | 4.45666667 | 0.6357935 | 15.29   | 4.4020847 | 17.958  | 5.978977 | 18.715   | 6.7094784 | 25.62   | 12.4964 |
| Prdm8        | 0.21666667 | 0.0351188 | 0.35    | 0.1111306 | 0.4     | 0.087464 | 0.785    | 0.2344497 | 0.88    | 0.49759 |
| Cyp4v3       | 1.83       | 0.2330236 | 3.33    | 0.4584757 | 4.37    | 0.598415 | 5.2625   | 1.0561368 | 6.498   | 1.68392 |
| Fbp2         | 0.38       | 0.1835756 | 0.77    | 0.2221486 | 0.994   | 0.44596  | 1.3125   | 0.347503  | 1.534   | 0.38305 |

|           |            |           |         |           |         |          |          |           |         |         |
|-----------|------------|-----------|---------|-----------|---------|----------|----------|-----------|---------|---------|
| Pde4b     | 4.84       | 0.3798684 | 7.446   | 0.9404946 | 9.94    | 1.059009 | 9.97     | 1.3573749 | 13.464  | 4.01128 |
| Shox2     | 0.87333333 | 0.3813572 | 1.826   | 0.6225592 | 1.876   | 0.395702 | 1.98     | 0.4469899 | 2.33    | 1.24439 |
| Dcn       | 50.8433333 | 8.9614805 | 175.854 | 49.275148 | 199.488 | 92.15284 | 252.7675 | 100.47934 | 299.506 | 173.067 |
| Zc4h2     | 0.45333333 | 0.1274101 | 0.692   | 0.1310343 | 0.768   | 0.312202 | 0.7825   | 0.2543456 | 0.826   | 0.31817 |
| Gbp6      | 0.50666667 | 0.1464013 | 1.004   | 0.2804104 | 1.16    | 0.208087 | 1.4525   | 0.3089094 | 1.59    | 1.00267 |
| Atp12a    | 2.99666667 | 0.5000333 | 16.884  | 3.7147719 | 17.414  | 2.896797 | 22.375   | 2.0376212 | 41.48   | 10.1196 |
| Cpq       | 1.34       | 0.4573839 | 2.04    | 0.6817624 | 2.246   | 0.627599 | 2.44     | 0.5409251 | 2.634   | 1.39346 |
| Ajm1      | 0.16333333 | 0.1101514 | 0.29    | 0.0339116 | 0.486   | 0.111937 | 0.8475   | 0.156285  | 1.366   | 0.27254 |
| C1qtnf5   | 0.77       | 0.1212436 | 1.376   | 0.4652741 | 1.496   | 0.645585 | 1.6      | 0.347467  | 1.874   | 1.00401 |
| Gm5751    | 0.15       | 0.1734935 | 0.282   | 0.2858671 | 0.29    | 0.31241  | 0.3625   | 0.1734695 | 0.572   | 0.28021 |
| Apo19b    | 0.52333333 | 0.2386071 | 0.702   | 0.2952457 | 1.134   | 0.361289 | 1.3775   | 0.4972843 | 1.394   | 0.34961 |
| Npy1r     | 0.63       | 0.0953939 | 1.02    | 0.2249444 | 1.106   | 0.460033 | 1.765    | 0.6616394 | 1.834   | 0.16652 |
| Pi16      | 2.16       | 0.6655073 | 8.636   | 4.2320007 | 12.584  | 5.097826 | 15.6675  | 5.4856259 | 26.636  | 22.2359 |
| Serping1  | 10.5466667 | 2.6079174 | 42.476  | 13.887558 | 47.708  | 17.031   | 57.3725  | 19.747171 | 68.054  | 38.5784 |
| Tnxb      | 4.85       | 0.8815328 | 12.728  | 3.7013335 | 13.036  | 2.954696 | 16.28    | 1.3660893 | 17.9    | 3.17508 |
| Dpyd      | 0.26       | 0.09      | 0.672   | 0.1413153 | 0.714   | 0.132778 | 0.915    | 0.2017424 | 1.126   | 0.40488 |
| Col23a1   | 8.62       | 0.6636264 | 18.858  | 3.1226063 | 20.44   | 1.778553 | 24.415   | 1.1601868 | 27.632  | 0.26948 |
| Sp100     | 2.25333333 | 0.4166933 | 4.11    | 0.8030255 | 5.714   | 0.953168 | 6.055    | 0.2783882 | 6.544   | 1.71124 |
| Arhgap6   | 0.19       | 0.1053565 | 0.442   | 0.1482228 | 0.52    | 0.132665 | 0.5725   | 0.0579511 | 0.598   | 0.23221 |
| Ankrd6    | 0.49333333 | 0.0929157 | 0.75    | 0.0463681 | 0.832   | 0.09094  | 1.175    | 0.0988264 | 1.252   | 0.23392 |
| Gm21541   | 2.40666667 | 1.4213491 | 3.12    | 1.9772835 | 3.876   | 1.797451 | 5.085    | 1.3320285 | 9.472   | 5.70575 |
| Lama1     | 0.15666667 | 0.1040833 | 0.268   | 0.0816701 | 0.71    | 0.276134 | 0.7575   | 0.1236595 | 1.034   | 0.31864 |
| Bco1      | 0.74       | 0.3109662 | 1.188   | 0.4071486 | 1.284   | 0.275917 | 1.4575   | 0.4617629 | 1.666   | 0.29108 |
| Stmn2     | 0.67666667 | 0.1900877 | 1.414   | 0.5951722 | 1.98    | 0.817282 | 2.275    | 0.3751    | 3.504   | 1.37577 |
| C1ra      | 0.90333333 | 0.1887679 | 3.578   | 1.03178   | 4.472   | 2.056653 | 6.24     | 1.7662578 | 7.522   | 4.68379 |
| Rec114    | 0.27       | 0.1509967 | 0.564   | 0.2019406 | 0.584   | 0.254617 | 0.635    | 0.1636052 | 0.74    | 0.46092 |
| Prrt2     | 1.34333333 | 0.2307235 | 2.434   | 0.6035561 | 2.884   | 0.295093 | 3.085    | 0.4133199 | 3.784   | 1.1007  |
| Serpina3c | 0.56333333 | 0.3650114 | 1.432   | 0.584953  | 2.12    | 0.830512 | 2.24     | 0.5577335 | 3.692   | 2.56607 |
| Cd68      | 7.98666667 | 1.1860157 | 12.684  | 0.8108514 | 13.516  | 2.024952 | 13.885   | 2.3962401 | 15.346  | 3.56085 |
| Flt3l     | 3.57666667 | 0.5029248 | 6.898   | 1.7167906 | 7.232   | 1.187548 | 9.6275   | 1.7533278 | 10.712  | 4.2353  |
| Cyba      | 6.16666667 | 1.7729166 | 10.488  | 1.5110162 | 11.798  | 1.9562   | 12.515   | 2.2859061 | 12.672  | 3.9937  |
| Il7       | 0.50333333 | 0.1069268 | 0.522   | 0.1310343 | 0.856   | 0.172134 | 1.08     | 0.1952776 | 1.264   | 0.66909 |
| Pgf       | 0.39666667 | 0.1059874 | 0.898   | 0.101341  | 1.062   | 0.338703 | 1.0625   | 0.2205108 | 1.126   | 0.5631  |
| B3galt2   | 0.17333333 | 0.1193035 | 0.406   | 0.1254193 | 0.44    | 0.05244  | 0.6075   | 0.2840628 | 0.64    | 0.784   |
| Pou6f1    | 2.13666667 | 0.2685765 | 2.274   | 0.2341581 | 3.444   | 0.323543 | 4.03     | 1.2542195 | 4.248   | 0.70769 |
| Zc3h6     | 0.96       | 0.02      | 1.534   | 0.1011435 | 1.592   | 0.384604 | 1.98     | 0.3358571 | 2.072   | 0.11054 |
| Kcne4     | 0.26666667 | 0.2196209 | 0.34    | 0.1286468 | 0.572   | 0.156269 | 0.6375   | 0.2930728 | 0.656   | 0.39879 |
| Erich2    | 0.13333333 | 0.1159023 | 0.18    | 0.0868907 | 0.382   | 0.150732 | 0.485    | 0.2193171 | 0.946   | 0.47109 |
| Akr1c13   | 0.55       | 0.3051229 | 2.492   | 0.9169351 | 6.038   | 1.126242 | 6.3825   | 2.1708735 | 13.208  | 5.9697  |
| Fgfbp3    | 4.32333333 | 0.4005413 | 4.34    | 0.8752428 | 6.522   | 1.259611 | 7.4775   | 1.8004143 | 7.496   | 2.87161 |
| S100a9    | 10.2333333 | 3.0843206 | 10.486  | 3.1443489 | 40.386  | 29.26964 | 41.1575  | 28.031591 | 55.13   | 28.2814 |
| Aldh1a1   | 1.29333333 | 0.1320353 | 2.548   | 0.5003699 | 3.456   | 0.624724 | 3.475    | 0.6052272 | 4.2     | 2.27263 |
| Tifa      | 0.93666667 | 0.1556706 | 1.818   | 0.4204402 | 2.122   | 0.288565 | 2.465    | 0.340245  | 2.758   | 0.53439 |
| Prfl      | 0.79333333 | 0.306159  | 0.87    | 0.3251154 | 2.23    | 0.66     | 2.33     | 0.235372  | 2.95    | 0.78807 |
| Atp13a5   | 0.45       | 0.069282  | 1.258   | 0.2262079 | 1.674   | 0.629389 | 1.725    | 0.4476978 | 1.98    | 0.24372 |
| Scgb1a1   | 0.61333333 | 0.0057735 | 2.328   | 1.0795925 | 3.384   | 1.470792 | 3.5225   | 1.3683171 | 6.356   | 1.96998 |
| Spin2c    | 0.44333333 | 0.1234234 | 0.69    | 0.1698529 | 0.774   | 0.190604 | 0.875    | 0.2126813 | 0.91    | 0.08944 |

|               |            |           |          |           |          |          |           |           |         |         |
|---------------|------------|-----------|----------|-----------|----------|----------|-----------|-----------|---------|---------|
| 9530057J20Ril | 0.37       | 0.1249    | 0.544    | 0.1761533 | 0.854    | 0.121161 | 1.0925    | 0.1322561 | 1.39    | 0.50917 |
| Tnfsf18       | 0.39666667 | 0.2386071 | 0.428    | 0.1458424 | 0.458    | 0.176833 | 0.53      | 0.0848528 | 1.108   | 0.77261 |
| Phldb2        | 4.43       | 0.7061869 | 4.458    | 0.4884363 | 5.726    | 0.80158  | 5.8       | 0.4222164 | 9.426   | 1.79849 |
| C3            | 0.76       | 0.08      | 3.826    | 2.0480186 | 4.634    | 2.135306 | 6.8125    | 4.2924226 | 9.998   | 7.91452 |
| Prkar2b       | 1.52333333 | 0.2914332 | 2.352    | 0.6452674 | 2.402    | 0.396888 | 2.6025    | 0.1497498 | 2.868   | 1.62501 |
| Glb1l2        | 0.73666667 | 0.1755942 | 1.028    | 0.2471235 | 1.19     | 0.151822 | 1.375     | 0.4514791 | 2.446   | 2.20235 |
| Gm21451       | 0.13666667 | 0.0960902 | 0.404    | 0.2230022 | 0.448    | 0.136638 | 0.67      | 0.2906315 | 0.878   | 0.66942 |
| BB114814      | 0.56333333 | 0.1604161 | 0.93     | 0.2270463 | 1.28     | 0.466369 | 1.2825    | 0.328773  | 1.568   | 0.41806 |
| Cacng7        | 0.49666667 | 0.1059874 | 0.936    | 0.16562   | 1.226    | 0.196291 | 1.4125    | 0.5842017 | 1.428   | 0.66833 |
| Pcp4          | 0.69666667 | 0.3092464 | 1.288    | 0.5653494 | 1.806    | 1.023733 | 4.3275    | 0.5784678 | 5.528   | 1.88143 |
| Defb6         | 777.88     | 229.01506 | 1075.048 | 114.80911 | 1327.452 | 289.5655 | 1336.8975 | 157.63033 | 2287.01 | 659.384 |
| Gm38510       | 0.04       | 0.034641  | 0.148    | 0.1515586 | 0.238    | 0.183766 | 0.3625    | 0.1857193 | 0.652   | 0.22874 |
| Tnip3         | 0.13666667 | 0.0635085 | 0.172    | 0.0637966 | 0.28     | 0.123491 | 0.355     | 0.2024022 | 0.642   | 0.48864 |
| Agr1a         | 0.21666667 | 0.1320353 | 0.59     | 0.2462722 | 0.632    | 0.064576 | 0.7875    | 0.2015564 | 0.844   | 0.56368 |
| 105247125     | 0.16       | 0.0360555 | 0.33     | 0.0839643 | 0.464    | 0.232013 | 0.5625    | 0.3268409 | 0.644   | 0.38397 |
| Tnni3         | 0.92333333 | 0.2289833 | 2.328    | 0.2054751 | 2.538    | 0.442911 | 2.8075    | 0.5754057 | 3.236   | 0.78264 |
| Amhr2         | 0.31       | 0.1374773 | 0.49     | 0.1617096 | 0.968    | 0.269017 | 1.405     | 0.2458319 | 2.436   | 0.64779 |
| Zic1          | 0.47333333 | 0.310215  | 1.012    | 0.3942968 | 1.294    | 0.398158 | 1.4125    | 0.2308499 | 1.636   | 0.99528 |
| Kcnu1         | 0.18       | 0.0458258 | 0.316    | 0.0991464 | 0.342    | 0.11649  | 0.475     | 0.248529  | 0.532   | 0.09039 |
| Slc39a4       | 0.23       | 0.0360555 | 0.232    | 0.0327109 | 0.36     | 0.046368 | 0.4225    | 0.1228481 | 0.598   | 0.27004 |
| B3galnt1      | 0.3        | 0.0984886 | 0.508    | 0.188202  | 0.672    | 0.133304 | 0.7375    | 0.2410221 | 0.746   | 0.41735 |
| Gm10591       | 2.40666667 | 1.4213491 | 3.12     | 1.9772835 | 3.876    | 1.797451 | 5.085     | 1.3320285 | 9.472   | 5.70575 |
| Osbp17        | 1.86666667 | 0.2250185 | 2.988    | 0.1942164 | 3.204    | 0.586541 | 3.235     | 0.5555478 | 4.136   | 0.57125 |
| Flt4          | 0.41       | 0.07      | 0.916    | 0.3793811 | 1.27     | 0.688731 | 1.2875    | 0.4927728 | 1.624   | 0.77854 |
| Uba7          | 0.64       | 0.01      | 1.39     | 0.4665297 | 1.666    | 0.264821 | 1.7825    | 0.1746186 | 1.846   | 0.59819 |
| Prr16         | 0.32666667 | 0.1096966 | 0.636    | 0.2006988 | 1.086    | 0.316828 | 1.3725    | 0.4120983 | 1.38    | 0.80991 |
| Mill1         | 10.7266667 | 0.5150081 | 15.118   | 4.3510999 | 27.334   | 8.327099 | 29.5675   | 7.5203917 | 31.246  | 12.15   |
| Scube1        | 0.48       | 0.1452584 | 0.826    | 0.1847431 | 1.046    | 0.10015  | 1.0875    | 0.4459727 | 1.166   | 0.52581 |
| Chst10        | 0.1        | 0.0360555 | 0.186    | 0.043359  | 0.388    | 0.114761 | 0.505     | 0.1050397 | 0.568   | 0.28173 |
| Ctso          | 1.25333333 | 0.1761628 | 2.786    | 0.5795947 | 2.926    | 0.469819 | 3.12      | 0.5273203 | 3.346   | 0.47543 |
| Alx4          | 0.48666667 | 0.0945163 | 0.944    | 0.2673574 | 0.996    | 0.261496 | 1.0775    | 0.3863828 | 1.342   | 0.7213  |
| Rusc2         | 1.99666667 | 0.3552933 | 3.03     | 0.5013482 | 3.362    | 0.519201 | 3.735     | 0.3879433 | 4.23    | 0.44508 |
| Casp4         | 2.37333333 | 0.2953529 | 6.298    | 1.1233521 | 14.542   | 2.539335 | 15.4575   | 2.3701248 | 21.024  | 3.93896 |
| Akap12        | 0.32666667 | 0.0750555 | 0.612    | 0.1769746 | 0.684    | 0.183657 | 0.8025    | 0.194315  | 0.83    | 0.37437 |
| Ccl11         | 0.79666667 | 0.4050103 | 4.872    | 1.8139239 | 5.548    | 3.128677 | 7.225     | 2.9764016 | 9.478   | 6.90371 |
| F830045P16Ri  | 1.12333333 | 0.0862168 | 1.49     | 0.5384701 | 2.682    | 0.935265 | 3.1475    | 1.0070212 | 3.464   | 1.59012 |
| Reck          | 1.26       | 0.2778489 | 2.602    | 0.5393237 | 3.358    | 0.740655 | 3.71      | 0.6595453 | 4.31    | 2.394   |
| Cep295nl      | 1.07       | 0.1153256 | 1.626    | 0.3806311 | 2.028    | 0.131415 | 2.1575    | 0.1990603 | 2.262   | 0.29533 |
| Gsta3         | 1.16666667 | 0.310215  | 2.12     | 0.5141984 | 3.008    | 1.516202 | 3.2575    | 0.9267281 | 3.614   | 2.19713 |
| Cyp2f2        | 5.52666667 | 1.9825321 | 12.172   | 4.4746028 | 21.042   | 11.59436 | 30.175    | 7.3183536 | 53.176  | 30.1811 |
| Sp5           | 0.16333333 | 0.1040833 | 0.406    | 0.0577062 | 0.426    | 0.068775 | 0.67      | 0.1920069 | 0.816   | 0.30221 |
| Pced1b        | 0.60666667 | 0.1305118 | 1.162    | 0.201792  | 1.458    | 0.358218 | 1.545     | 0.3331166 | 1.71    | 0.44983 |
| Olfml1        | 0.65666667 | 0.1379613 | 0.984    | 0.5255759 | 1.008    | 0.508154 | 1.0875    | 0.3241784 | 1.836   | 1.34441 |
| Apol9a        | 0.54333333 | 0.2030599 | 0.632    | 0.1116692 | 1.108    | 0.81558  | 1.4575    | 0.7599287 | 2.098   | 0.39771 |
| Steap4        | 12.3766667 | 1.4821044 | 12.908   | 1.8250808 | 13.21    | 1.027156 | 21.1025   | 3.8311302 | 25.772  | 9.11754 |
| C2            | 0.80666667 | 0.3370954 | 1.466    | 0.441622  | 2.802    | 0.639469 | 3.1225    | 0.9079785 | 5.298   | 1.94441 |
| Nexn          | 1.07       | 0.2080865 | 1.704    | 0.3007989 | 1.708    | 0.180056 | 2.3325    | 0.1046821 | 2.602   | 0.50742 |

|           |             |           |        |           |        |          |         |           |        |         |
|-----------|-------------|-----------|--------|-----------|--------|----------|---------|-----------|--------|---------|
| Nlrp1b    | 0.45333333  | 0.1709776 | 1.284  | 0.2398541 | 1.294  | 0.576784 | 1.635   | 0.3046856 | 1.75   | 0.1437  |
| Irx6      | 0.04333333  | 0.051316  | 0.306  | 0.095551  | 0.322  | 0.188865 | 0.45    | 0.1974842 | 0.576  | 0.24368 |
| Nudt16    | 0.58333333  | 0.0896289 | 1.17   | 0.336006  | 1.25   | 0.188547 | 1.355   | 0.2338803 | 1.372  | 0.26771 |
| Cd209a    | 0.35333333  | 0.1767295 | 0.89   | 0.1945508 | 1.204  | 0.510078 | 1.7275  | 0.9346791 | 2.168  | 1.91086 |
| Tceal3    | 0.58333333  | 0.136504  | 1.034  | 0.1998249 | 1.18   | 0.304549 | 1.2325  | 0.2966901 | 1.446  | 0.32616 |
| Serpina3g | 12.73       | 1.2164292 | 25.458 | 4.8491927 | 27.752 | 5.473972 | 29.7775 | 5.5088557 | 31.446 | 5.00671 |
| Tmem106a  | 2.62333333  | 0.2203028 | 4.802  | 0.4133642 | 5.384  | 0.850782 | 5.5975  | 0.6609778 | 6.022  | 1.82666 |
| Dnaaf3    | 0.97666667  | 0.1001665 | 1.884  | 0.1312631 | 2.314  | 0.281478 | 2.6     | 0.2515287 | 3.176  | 0.25938 |
| Cyt1l     | 0.04        | 0.034641  | 0.244  | 0.1767201 | 0.3    | 0.20025  | 0.3975  | 0.2444552 | 0.996  | 1.23852 |
| Ikzf4     | 0.46333333  | 0.0305505 | 0.494  | 0.0378153 | 0.586  | 0.15678  | 0.5875  | 0.0873212 | 1.08   | 0.16016 |
| Mgl2      | 1.97333333  | 0.5367805 | 2.996  | 0.8707353 | 4.948  | 2.77761  | 6.0075  | 1.49355   | 7.36   | 5.23864 |
| Cd209e    | 0.09        | 0.06      | 0.376  | 0.1855532 | 0.754  | 0.39866  | 0.8675  | 0.3497023 | 2.214  | 2.23971 |
| Gm5941    | 0.94        | 0.069282  | 1.016  | 0.4415088 | 1.172  | 0.425347 | 1.965   | 0.4753595 | 5.142  | 1.29621 |
| Morn3     | 0.27        | 0.1558846 | 0.454  | 0.2140794 | 0.502  | 0.258689 | 0.5075  | 0.1887459 | 0.52   | 0.13323 |
| Man1a     | 2.51333333  | 0.6661331 | 5.088  | 0.4027654 | 7.102  | 1.029136 | 7.1525  | 1.7762578 | 7.334  | 3.78029 |
| Mme       | 0.55        | 0.0964365 | 1.038  | 0.2115892 | 1.36   | 0.323651 | 1.5325  | 0.2971391 | 2.43   | 1.45846 |
| Efemp1    | 4.45333333  | 0.6686055 | 13.53  | 3.0807872 | 16.31  | 4.623597 | 19.9925 | 4.773862  | 23.966 | 8.64031 |
| Cd180     | 0.19333333  | 0.0737111 | 0.358  | 0.1870027 | 0.382  | 0.144118 | 0.425   | 0.1479865 | 0.528  | 0.4124  |
| Abcb1b    | 2.12        | 0.3306055 | 3.232  | 0.1781011 | 3.634  | 0.383445 | 4.01    | 0.3979112 | 4.28   | 0.34843 |
| Ccl21c    | 2.40666667  | 1.4213491 | 3.12   | 1.9772835 | 3.876  | 1.797451 | 5.085   | 1.3320285 | 9.472  | 5.70575 |
| Cla3a1    | 6.56333333  | 1.2930713 | 10.494 | 1.8268087 | 10.692 | 2.589666 | 13.6175 | 1.9233369 | 15.986 | 3.27369 |
| Otx1      | 0.09333333  | 0.011547  | 0.182  | 0.0804363 | 0.28   | 0.088318 | 0.415   | 0.2425558 | 0.566  | 0.28615 |
| Aoc3      | 1.12333333  | 0.2829016 | 1.912  | 0.7722823 | 2.546  | 0.619217 | 2.565   | 0.6450581 | 4.38   | 4.9146  |
| Dpep1     | 1.35333333  | 0.9623063 | 3.494  | 1.451699  | 4.094  | 1.503356 | 4.9     | 2.6022426 | 6.456  | 4.29729 |
| Cuzd1     | 0.36333333  | 0.1069268 | 0.37   | 0.1471394 | 0.882  | 0.234776 | 0.9725  | 0.4327721 | 1.356  | 0.29467 |
| Lbp       | 0.69        | 0.2424871 | 2.054  | 0.6778864 | 4.644  | 2.620073 | 5.015   | 2.9817053 | 6.424  | 3.68334 |
| Fn3k      | 0.18        | 0.1345362 | 0.284  | 0.0477493 | 0.314  | 0.069857 | 0.555   | 0.0685565 | 0.584  | 0.32067 |
| Casp1     | 3.23333333  | 0.9061089 | 8.792  | 1.2125675 | 18.186 | 2.812886 | 20.195  | 1.79201   | 21.2   | 4.50698 |
| Gm13304   | 2.40666667  | 1.4213491 | 3.12   | 1.9772835 | 3.876  | 1.797451 | 5.085   | 1.3320285 | 9.472  | 5.70575 |
| Ndp       | 0.32333333  | 0.1001665 | 0.526  | 0.0630872 | 0.622  | 0.185796 | 0.6825  | 0.0830161 | 0.692  | 0.39959 |
| Svep1     | 0.11666667  | 0.0152753 | 0.538  | 0.1997999 | 0.556  | 0.192432 | 0.5625  | 0.1381726 | 0.924  | 0.53599 |
| Cd302     | 1.27        | 0.21      | 4      | 1.2390117 | 5.072  | 1.421661 | 5.3825  | 1.7210535 | 6.196  | 3.09078 |
| Steap2    | 0.21        | 0.0556776 | 0.554  | 0.0594138 | 0.706  | 0.060663 | 0.865   | 0.189473  | 0.936  | 0.09476 |
| Cped1     | 0.85333333  | 0.1650253 | 2.604  | 0.8013925 | 2.782  | 0.634799 | 3.4375  | 0.6157583 | 3.438  | 1.81003 |
| Serpina3i | 12.84333333 | 1.3563308 | 19.982 | 4.908622  | 21.28  | 8.321337 | 22.115  | 4.4921673 | 30.456 | 6.52878 |
| Stx1b     | 0.21666667  | 0.1106044 | 0.378  | 0.0762889 | 0.55   | 0.076158 | 0.5875  | 0.1233896 | 0.706  | 0.22075 |
| Meiob     | 0.24        | 0.1708801 | 0.39   | 0.0595819 | 0.458  | 0.200674 | 0.9275  | 0.2217168 | 1.114  | 0.35061 |
| Ntn1      | 0.92333333  | 0.1724336 | 2.858  | 1.02702   | 3.544  | 1.394572 | 4.275   | 0.5876791 | 4.454  | 2.45911 |
| Slit2     | 0.19        | 0.01      | 0.63   | 0.1850676 | 0.684  | 0.138672 | 0.7975  | 0.140327  | 0.972  | 0.60309 |
| Emx2      | 0.45666667  | 0.080829  | 1.186  | 0.3628774 | 1.336  | 0.572608 | 1.65    | 0.2864728 | 1.788  | 0.46181 |
| Sfxn5     | 1.69333333  | 0.0929157 | 2.738  | 0.4189511 | 3.01   | 0.668281 | 3.265   | 0.7327801 | 3.558  | 0.28874 |
| Unc93a2   | 0.92333333  | 0.3028751 | 1.1    | 0.566083  | 1.3    | 0.269722 | 1.9525  | 0.662489  | 2.594  | 0.72759 |
| Rab11fip4 | 9.74        | 0.2165641 | 16.216 | 2.6585297 | 17.092 | 3.06309  | 18.375  | 4.439298  | 20.258 | 2.26109 |
| Adcyap1r1 | 0.03666667  | 0.0321455 | 0.106  | 0.068775  | 0.188  | 0.087006 | 0.28    | 0.0496655 | 0.664  | 0.50964 |
| Kctd12    | 19.35666667 | 2.9116547 | 30.814 | 3.0221152 | 35.398 | 5.887382 | 36.7125 | 10.74754  | 44.654 | 7.31139 |
| Apol7a    | 1.04333333  | 0.1792577 | 1.41   | 0.3011644 | 1.88   | 0.627933 | 1.9925  | 1.1907526 | 4.29   | 1.25509 |
| Calca     | 0.04666667  | 0.0251661 | 0.154  | 0.1052616 | 0.526  | 0.167571 | 0.5475  | 0.1728921 | 0.558  | 0.45839 |

|           |            |           |         |           |         |          |          |           |         |         |
|-----------|------------|-----------|---------|-----------|---------|----------|----------|-----------|---------|---------|
| Gpnm      | 4.01666667 | 1.2626295 | 5.986   | 0.6400234 | 11.932  | 2.638119 | 14.945   | 1.4074682 | 22.578  | 5.19454 |
| Rnf32     | 0.32333333 | 0.1789786 | 0.364   | 0.071624  | 0.366   | 0.105736 | 0.4275   | 0.249583  | 0.558   | 0.27326 |
| Foxred2   | 1.68       | 0.1044031 | 2.384   | 0.200075  | 2.566   | 0.120125 | 3.2325   | 0.309879  | 3.254   | 0.50332 |
| Plekha2   | 6.18666667 | 0.2350177 | 8.358   | 0.7949025 | 9.536   | 1.227082 | 11.2825  | 0.6121206 | 11.466  | 1.05154 |
| Ttc12     | 0.79       | 0.0360555 | 0.804   | 0.1694993 | 0.916   | 0.205256 | 0.9625   | 0.2572126 | 1.19    | 0.38    |
| Aldoc     | 5.85666667 | 0.4600362 | 6.094   | 0.5069813 | 6.632   | 0.426931 | 7.83     | 2.0379892 | 9.864   | 0.62752 |
| Lonrf1    | 1.68666667 | 0.2050203 | 1.974   | 0.2430638 | 2.338   | 0.384148 | 2.6275   | 0.4798871 | 2.732   | 0.261   |
| Hivep1    | 6.24       | 0.2022375 | 7.876   | 0.9348957 | 8.202   | 0.497564 | 8.315    | 1.6195987 | 9.238   | 1.23039 |
| Naa35     | 17.7233333 | 0.9615786 | 17.782  | 0.9066256 | 18.026  | 0.855441 | 18.1675  | 0.3242813 | 19.012  | 0.88194 |
| Arid1b    | 7.80333333 | 0.2437895 | 8.652   | 0.6576245 | 8.88    | 0.473339 | 8.9525   | 0.8578024 | 9.076   | 1.24965 |
| Abcc1     | 24.72      | 1.9465611 | 26.79   | 1.2832576 | 26.814  | 1.013573 | 27.53    | 1.1323721 | 30.368  | 1.80842 |
| Plk2      | 8.96333333 | 1.3266625 | 11.35   | 1.0362191 | 11.888  | 1.244174 | 12.8175  | 2.5826133 | 14.286  | 1.4469  |
| Zfp606    | 1.41333333 | 0.2640707 | 1.744   | 0.0835464 | 1.756   | 0.260538 | 1.7925   | 0.1778342 | 1.956   | 0.33545 |
| Ncoa2     | 6.08       | 0.5458022 | 7.398   | 0.6229526 | 7.682   | 0.788714 | 7.8025   | 0.912081  | 8.048   | 1.41201 |
| Man2b2    | 12.8533333 | 1.3443338 | 13.838  | 1.4300594 | 15.512  | 1.989264 | 17.8725  | 1.5168471 | 18.11   | 1.85468 |
| Zfp784    | 2.95333333 | 0.3453018 | 3.334   | 0.4638211 | 3.448   | 0.368809 | 3.7025   | 0.3163727 | 3.822   | 0.43373 |
| Tnfrsf13b | 0.46666667 | 0.064291  | 0.486   | 0.1203329 | 0.604   | 0.237655 | 0.63     | 0.1494434 | 0.684   | 0.30762 |
| Foxj2     | 9.50333333 | 0.685298  | 11.128  | 1.0635413 | 11.734  | 1.157251 | 12.535   | 1.5787865 | 13.05   | 1.20872 |
| Slc25a45  | 2.58       | 0.1135782 | 3.648   | 0.5973023 | 3.922   | 0.525519 | 4.16     | 0.3148545 | 4.71    | 0.57637 |
| Rcor3     | 6.26       | 0.7308215 | 6.856   | 0.5559946 | 7.312   | 1.252845 | 7.615    | 1.0780383 | 7.918   | 0.72929 |
| Cyld      | 3.40333333 | 0.3682843 | 4.514   | 0.1578924 | 4.686   | 0.233088 | 4.8275   | 0.7232508 | 5.05    | 1.02379 |
| Net1      | 86.3666667 | 5.1936532 | 96.622  | 7.1965631 | 114.832 | 11.44837 | 117.2325 | 13.891238 | 118.026 | 10.3003 |
| Acadsb    | 11.67      | 1.3550277 | 11.79   | 0.7443118 | 12.284  | 1.476018 | 12.66    | 1.0464225 | 13.176  | 1.07654 |
| Arl4c     | 18.8233333 | 1.3452633 | 21.302  | 1.5238668 | 24.97   | 1.983343 | 27.0975  | 0.9385938 | 27.948  | 2.59506 |
| Wasf2     | 32.28      | 2.6806156 | 34.236  | 1.089922  | 35.334  | 0.925192 | 35.71    | 4.095233  | 40.748  | 3.03114 |
| Cryz      | 2.62       | 0.9656086 | 3.236   | 0.3674643 | 3.302   | 0.314436 | 3.52     | 0.5231316 | 3.526   | 0.33508 |
| Gm1673    | 0.43666667 | 0.2441994 | 0.564   | 0.467258  | 0.594   | 0.374072 | 0.805    | 0.1452584 | 1.036   | 0.28325 |
| Sik1      | 19.9233333 | 7.2066104 | 21.582  | 4.1497193 | 22.46   | 6.06414  | 24.5075  | 4.8243298 | 31.13   | 4.28569 |
| Tcp1111   | 0.52666667 | 0.1001665 | 0.614   | 0.151096  | 0.748   | 0.10872  | 0.79     | 0.1061446 | 0.884   | 0.11082 |
| Reep3     | 32.4633333 | 1.250973  | 33.06   | 2.7512724 | 33.994  | 2.802067 | 34.58    | 2.3894072 | 37.466  | 2.99867 |
| Zfp984    | 2.03666667 | 0.3100538 | 2.992   | 0.3615522 | 3.226   | 0.495459 | 3.6375   | 0.698206  | 3.66    | 0.68154 |
| Mdc1      | 5.56666667 | 0.8303212 | 6.604   | 0.4793016 | 7.088   | 0.502762 | 7.465    | 0.4822517 | 8.394   | 0.90787 |
| Ppm1l     | 1.28333333 | 0.0057735 | 1.31    | 0.1220656 | 1.636   | 0.141174 | 1.8625   | 0.2478407 | 1.954   | 0.25314 |
| Lrrcc1    | 1.79       | 0.2882707 | 2.01    | 0.1206234 | 2.044   | 0.621514 | 2.1675   | 0.1719254 | 2.206   | 0.66033 |
| Cdh4      | 1.63333333 | 0.2421432 | 2.276   | 0.3701756 | 2.566   | 0.757351 | 2.865    | 0.1488847 | 3.672   | 0.40071 |
| Srr       | 4.96       | 0.5864299 | 6.086   | 0.7693699 | 6.122   | 0.533732 | 6.175    | 0.7183546 | 6.682   | 1.12402 |
| Mcm9      | 2.59       | 0.2783882 | 3.65    | 0.5356771 | 3.676   | 0.403088 | 3.7025   | 0.357433  | 3.936   | 0.32562 |
| Chpt1     | 4.05333333 | 0.1877054 | 5.064   | 1.1604008 | 5.316   | 0.865176 | 6.2425   | 0.7392507 | 6.368   | 3.5417  |
| Hfe       | 4.05666667 | 0.59769   | 5.204   | 0.8216934 | 5.236   | 0.764742 | 5.3175   | 0.3949156 | 5.348   | 1.4783  |
| N4bp2l1   | 3.23333333 | 0.3951371 | 3.974   | 1.0616167 | 4.798   | 1.295403 | 5.5125   | 0.6533695 | 5.964   | 1.51685 |
| Col17a1   | 332.243333 | 25.792027 | 389.354 | 25.349522 | 407.978 | 46.00338 | 453.7475 | 55.58459  | 483.974 | 56.5411 |
| Vim       | 201.34     | 34.019613 | 273.32  | 61.429289 | 296.928 | 52.65255 | 301.84   | 30.101589 | 321.732 | 95.0072 |
| Smpd13a   | 35.4233333 | 3.661821  | 43.95   | 4.6605418 | 46.388  | 6.147835 | 58.65    | 7.4596559 | 71.674  | 5.50401 |
| Nod2      | 3.66333333 | 0.6109283 | 4.096   | 0.4703509 | 5.522   | 1.272938 | 6.2125   | 1.643946  | 6.792   | 1.83044 |
| Gimap1    | 1.89       | 0.0655744 | 2.426   | 0.277092  | 2.488   | 0.37151  | 2.605    | 0.1769181 | 2.994   | 0.44848 |
| Dock3     | 0.29666667 | 0.122202  | 0.394   | 0.0384708 | 0.402   | 0.064187 | 0.4475   | 0.0298608 | 0.518   | 0.05541 |
| Top1mt    | 8.03       | 0.3559494 | 11.13   | 0.7181922 | 11.238  | 0.992104 | 11.2625  | 0.7738809 | 11.476  | 1.31056 |

|         |             |           |        |           |        |          |         |           |        |         |
|---------|-------------|-----------|--------|-----------|--------|----------|---------|-----------|--------|---------|
| Ccdc88a | 0.64666667  | 0.0814453 | 0.736  | 0.114149  | 0.824  | 0.093702 | 0.835   | 0.1558846 | 0.958  | 0.38062 |
| Fbxo32  | 5.6         | 0.2523886 | 7.496  | 1.0948196 | 8.572  | 1.504018 | 8.69    | 2.543816  | 9.564  | 2.22543 |
| Bbs7    | 1.36        | 0.3579106 | 1.998  | 0.2278596 | 2.014  | 0.25225  | 2.225   | 0.3387723 | 2.318  | 0.37426 |
| Arnt2   | 0.58        | 0.1609348 | 0.666  | 0.092358  | 0.7    | 0.141244 | 0.835   | 0.0264575 | 0.93   | 0.25681 |
| Zhx3    | 2.53        | 0.2364318 | 2.784  | 0.3039408 | 2.942  | 0.371645 | 2.945   | 0.4723346 | 3.528  | 0.59667 |
| Zfp3611 | 64.91       | 13.714441 | 69.436 | 7.2782058 | 72.746 | 7.723515 | 84.2675 | 2.9122314 | 90.036 | 15.9314 |
| Adat3   | 3           | 0.4932545 | 3.99   | 0.4818714 | 4.074  | 0.626083 | 4.235   | 0.4694323 | 4.462  | 0.93401 |
| Ptpn23  | 14.24333333 | 1.364197  | 15.136 | 1.5369548 | 15.556 | 0.929263 | 16.5775 | 1.7328277 | 17.51  | 0.58826 |
| Rufy2   | 1.98        | 0.5524491 | 2.482  | 0.3093865 | 2.752  | 0.31348  | 2.88    | 0.2615339 | 2.974  | 0.60871 |
| Dpy1913 | 0.92        | 0.1252996 | 1.2    | 0.1547579 | 1.45   | 0.145258 | 1.5575  | 0.245     | 1.562  | 0.22084 |
| Gsk3b   | 11.81       | 0.3482815 | 13.064 | 0.3927213 | 13.77  | 1.321685 | 14.1575 | 1.775338  | 14.248 | 1.863   |
| Tmem127 | 20.5066667  | 0.8360821 | 21.91  | 0.8057605 | 22.754 | 1.393998 | 22.8    | 2.4758702 | 23.426 | 1.29641 |
| Ppp1r1a | 0.24333333  | 0.0602771 | 0.348  | 0.1801943 | 0.472  | 0.256457 | 0.555   | 0.174069  | 0.666  | 0.53486 |
| Col4a6  | 3.62333333  | 0.1844813 | 3.724  | 0.844707  | 4.256  | 0.762581 | 4.8875  | 1.5366495 | 5.258  | 0.59319 |
| Ssc5d   | 0.60666667  | 0.1159023 | 0.638  | 0.1758408 | 0.768  | 0.257041 | 0.7725  | 0.0826136 | 0.952  | 0.52156 |
| Dcbld2  | 1.1         | 0.0953939 | 1.43   | 0.0897218 | 1.452  | 0.214756 | 1.5775  | 0.1090489 | 1.628  | 0.32322 |
| Wdr45   | 22.66       | 1.4792904 | 24.886 | 1.8425607 | 25.1   | 3.649658 | 26.1975 | 4.3698923 | 27.54  | 4.23965 |
| Il1r2   | 43.7        | 3.1892319 | 43.798 | 7.761074  | 57.05  | 7.726853 | 65.6825 | 8.6884804 | 79.164 | 8.13588 |
| Zfp939  | 1.46333333  | 0.1530795 | 1.746  | 0.2042792 | 1.802  | 0.258399 | 1.8075  | 0.3553754 | 1.958  | 0.31244 |
| Il10rb  | 10.17       | 0.1967232 | 13.064 | 1.2651996 | 13.26  | 1.066536 | 13.7825 | 0.6745554 | 13.804 | 2.22542 |
| Cipc    | 15.0966667  | 1.3285079 | 19.982 | 1.3906905 | 20.816 | 2.766447 | 21.2    | 2.9313137 | 22.994 | 4.12403 |
| Mcur1   | 16.2966667  | 1.337996  | 17.532 | 1.0966403 | 18.14  | 1.366254 | 18.7525 | 1.2965435 | 20.7   | 1.70699 |
| Phf21a  | 6.58        | 0.5302829 | 8.154  | 0.9535617 | 8.7    | 1.773922 | 9.6125  | 1.0477714 | 9.686  | 1.41127 |
| St3gal1 | 2.58333333  | 0.9500175 | 3.442  | 0.8730235 | 4.206  | 1.417914 | 4.415   | 2.7002407 | 4.542  | 2.00177 |
| Rab32   | 6.15333333  | 0.2579406 | 7.352  | 0.5688761 | 9.456  | 1.221303 | 10.22   | 1.2777845 | 11.636 | 0.83954 |
| Ghr     | 11.4166667  | 1.5373137 | 13.258 | 1.3082316 | 14.23  | 1.730072 | 15.155  | 1.6994999 | 15.452 | 5.35746 |
| Nhs1l   | 13.3433333  | 0.760548  | 13.818 | 1.7992415 | 15.278 | 1.516087 | 16.665  | 3.5176649 | 19.842 | 2.27409 |
| Plekhh1 | 0.66333333  | 0.0945163 | 0.78   | 0.1369306 | 0.816  | 0.090719 | 0.8525  | 0.3063087 | 0.912  | 0.15255 |
| Kif13a  | 8.48        | 0.3702702 | 9.778  | 0.3939162 | 9.9    | 0.781505 | 10.445  | 1.2760486 | 13.302 | 0.36431 |
| Kmt2e   | 18.2566667  | 0.5220473 | 19.754 | 2.2870352 | 19.978 | 1.144255 | 21.2    | 2.9029296 | 25.114 | 3.6147  |
| Trim26  | 13.79       | 1.0396634 | 15.664 | 1.3168447 | 15.782 | 1.929889 | 16.85   | 1.9324768 | 17.304 | 0.99357 |
| Lrp10   | 72.1266667  | 6.2535137 | 76.224 | 3.3849047 | 77.07  | 6.821451 | 79.1675 | 4.7997457 | 79.312 | 6.10873 |
| Foxn3   | 11.9933333  | 1.3414296 | 12.974 | 1.4337294 | 14.118 | 3.161435 | 14.7725 | 2.7245107 | 16.038 | 2.34697 |
| Mfap3   | 7.62666667  | 0.9309314 | 7.914  | 0.3907429 | 7.954  | 0.754606 | 8.0375  | 0.820909  | 8.476  | 0.96855 |
| Hsf2    | 10.63       | 0.9347192 | 12.702 | 1.2575651 | 12.848 | 2.216477 | 13.575  | 1.8741131 | 14.782 | 1.56177 |
| Zfp820  | 0.66        | 0.1058301 | 0.702  | 0.0576194 | 0.782  | 0.080436 | 0.835   | 0.1852026 | 0.94   | 0.29496 |
| Nub1    | 19.5366667  | 0.4400379 | 20.9   | 1.344749  | 21.764 | 1.458451 | 22.1975 | 0.972878  | 22.442 | 2.28231 |
| Ank2    | 0.34        | 0.103923  | 0.392  | 0.1028105 | 0.394  | 0.125419 | 0.465   | 0.0957427 | 0.666  | 0.31037 |
| Susd6   | 22.4466667  | 1.6042859 | 29.046 | 2.546955  | 30.186 | 2.545158 | 33.0675 | 2.3963357 | 33.186 | 4.63915 |
| Fam168a | 6.08        | 0.47571   | 6.55   | 0.4712749 | 7.058  | 0.611204 | 7.3225  | 0.9287043 | 8.456  | 1.59751 |
| Shroom4 | 1.76333333  | 0.1357694 | 2.386  | 0.3021258 | 2.494  | 0.3437   | 2.565   | 0.4415503 | 2.586  | 0.2553  |
| Ptpn6   | 14.1866667  | 0.9187673 | 19.754 | 1.781693  | 19.908 | 2.218833 | 20.765  | 1.6000937 | 21.32  | 2.0177  |
| Impact  | 8.10333333  | 2.0453443 | 10.08  | 0.8929726 | 10.092 | 1.410929 | 10.51   | 0.4130375 | 11.016 | 1.94238 |
| Dnajc11 | 23.4666667  | 0.9394325 | 23.962 | 1.2325867 | 24.446 | 2.378914 | 25.1325 | 2.014636  | 25.716 | 2.25883 |
| Xrn1    | 4.09333333  | 0.5614564 | 4.364  | 0.2987139 | 4.396  | 0.493893 | 4.5225  | 0.3963479 | 4.744  | 0.53952 |
| Trpc1   | 0.52333333  | 0.0750555 | 0.664  | 0.0691375 | 0.876  | 0.158524 | 0.905   | 0.1948504 | 1.064  | 0.16072 |
| Ccdc57  | 1.18333333  | 0.3827967 | 1.368  | 0.1930544 | 1.39   | 0.187216 | 1.53    | 0.2381876 | 1.806  | 0.25066 |



|          |            |           |         |           |         |          |          |           |         |         |
|----------|------------|-----------|---------|-----------|---------|----------|----------|-----------|---------|---------|
| Trim47   | 13.1966667 | 1.2015545 | 14.818  | 2.4990338 | 15.354  | 1.359993 | 15.6475  | 1.5829377 | 18.02   | 2.4613  |
| Ahnak2   | 48         | 1.3513327 | 65.146  | 7.5584608 | 65.808  | 8.640299 | 68.0275  | 17.6463   | 84.788  | 10.5688 |
| Atf7ip   | 11.27      | 0.9340771 | 14.418  | 0.6029677 | 14.762  | 1.8253   | 14.8875  | 1.8904387 | 15.036  | 1.91347 |
| Tut4     | 1.65333333 | 0.3579572 | 2.186   | 0.2670768 | 2.212   | 0.307278 | 2.4775   | 0.2411604 | 2.612   | 0.51222 |
| Pde4c    | 0.81333333 | 0.2458319 | 1.084   | 0.2654807 | 1.264   | 0.252349 | 1.2725   | 0.2165448 | 1.312   | 0.20438 |
| Akap9    | 3.81       | 0.6039868 | 4.144   | 0.2272224 | 4.174   | 0.393357 | 4.175    | 0.4886376 | 4.488   | 0.65194 |
| Maneal   | 0.88666667 | 0.1497776 | 1.222   | 0.2631919 | 1.252   | 0.193701 | 1.57     | 0.3053959 | 1.678   | 0.22687 |
| Clcn6    | 2.32666667 | 0.2107922 | 2.958   | 0.3259908 | 3.1     | 0.207846 | 3.23     | 0.3148545 | 3.364   | 0.32944 |
| Zfp558   | 0.53       | 0.2306513 | 0.556   | 0.0920869 | 0.62    | 0.100499 | 0.665    | 0.0929157 | 0.7     | 0.06205 |
| Cables2  | 7.52666667 | 0.4913587 | 9.374   | 0.4989289 | 9.758   | 0.660507 | 9.89     | 0.8204064 | 10.502  | 0.4585  |
| Kat14    | 8.67666667 | 0.8844396 | 9.758   | 0.4577882 | 9.77    | 0.988155 | 10.1775  | 1.0446491 | 10.358  | 0.62851 |
| Cyfp2    | 3.96333333 | 0.1514376 | 5.244   | 0.5785586 | 5.816   | 0.294075 | 6.085    | 1.1929934 | 7.046   | 0.54261 |
| Atnx1    | 4.48666667 | 0.8113158 | 4.822   | 0.1814387 | 5.112   | 0.636412 | 5.27     | 0.2493993 | 6.946   | 0.80986 |
| Srrm1    | 37.4833333 | 2.0016576 | 38.974  | 1.0998545 | 41.026  | 1.243998 | 45.115   | 2.697956  | 45.2    | 3.35031 |
| Ptpdc1   | 2.37666667 | 0.0585947 | 2.846   | 0.2085186 | 3.334   | 0.596138 | 3.48     | 0.2393045 | 3.628   | 0.28543 |
| Pomk     | 3.43666667 | 0.2177919 | 3.87    | 0.248998  | 4.102   | 0.334245 | 4.2375   | 0.4827957 | 4.38    | 0.38158 |
| Plb1     | 1.85666667 | 0.1331666 | 1.864   | 0.4332782 | 2.296   | 0.488805 | 2.645    | 0.3437538 | 2.856   | 0.58248 |
| Ep300    | 7.60666667 | 0.8113158 | 9.22    | 0.6047727 | 9.334   | 0.773065 | 9.6825   | 1.0998295 | 9.764   | 1.40824 |
| Dcaf5    | 6.11666667 | 0.3888873 | 6.474   | 0.3869496 | 6.664   | 0.294839 | 7.145    | 0.4704962 | 7.712   | 0.62291 |
| Ppm1k    | 0.87666667 | 0.1209683 | 0.946   | 0.117601  | 0.998   | 0.313002 | 1.1175   | 0.2115617 | 1.146   | 0.20219 |
| Lce11    | 152.706667 | 23.192424 | 171.166 | 35.711606 | 196.35  | 38.79475 | 262.1225 | 72.631115 | 269.964 | 45.0257 |
| Poglut1  | 9.51       | 0.926013  | 10.71   | 0.55933   | 10.986  | 0.921103 | 12.2975  | 0.9463394 | 12.376  | 1.00764 |
| Kdm4c    | 5.33       | 0.9224424 | 5.76    | 0.4486647 | 6.044   | 0.704507 | 6.3325   | 0.5259515 | 6.662   | 1.07286 |
| Prcp     | 6.36       | 0.4058325 | 7.3     | 0.4312772 | 7.718   | 0.644298 | 8.1625   | 0.9095558 | 8.254   | 0.60896 |
| Spn      | 5.37333333 | 0.6236452 | 6.288   | 0.5915404 | 6.588   | 0.486436 | 6.7975   | 1.0984041 | 7.622   | 0.43182 |
| Dll1     | 9.88333333 | 1.3403109 | 10.786  | 0.9193911 | 11.86   | 1.823774 | 12.275   | 0.7630422 | 14.784  | 3.11794 |
| Cbfa2t3  | 0.83666667 | 0.1021437 | 1.11    | 0.2259425 | 1.206   | 0.167123 | 1.215    | 0.0544671 | 1.36    | 0.51444 |
| Vegfb    | 10.46      | 1.3474791 | 12.318  | 2.2575584 | 13.344  | 2.348974 | 14.1075  | 1.994131  | 14.258  | 1.45828 |
| Olfm1    | 4.60666667 | 0.979915  | 6.762   | 1.7891674 | 7.414   | 1.673239 | 8.15     | 0.6674828 | 8.328   | 2.7314  |
| Arhgap42 | 2.53666667 | 0.402782  | 3.302   | 0.2239866 | 3.45    | 0.453597 | 3.61     | 0.3584225 | 4.14    | 0.63206 |
| Ids      | 8.78       | 0.6643041 | 9.674   | 0.7372788 | 10.6    | 0.655858 | 12.0425  | 1.9954344 | 15.514  | 2.33181 |
| Msh6     | 7.52333333 | 0.9143486 | 8.63    | 0.8190238 | 8.718   | 0.829017 | 9.44     | 0.657926  | 9.512   | 0.61483 |
| Ppp1r3d  | 0.66666667 | 0.2159475 | 0.94    | 0.1604681 | 1.04    | 0.140712 | 1.2425   | 0.1284199 | 1.244   | 0.18474 |
| Sfl      | 67.6433333 | 3.3376089 | 68.318  | 1.9906456 | 72.39   | 2.464396 | 73.83    | 1.8461311 | 74.428  | 2.72213 |
| Dlg5     | 5.42       | 0.5408327 | 6.128   | 0.2858671 | 6.186   | 0.495762 | 6.8975   | 0.7613311 | 7.438   | 0.55129 |
| Ppm1a    | 34.8566667 | 1.0913447 | 36.272  | 1.435695  | 37.674  | 1.784917 | 38.0925  | 2.2073117 | 40.11   | 3.85032 |
| Aifm2    | 1.46333333 | 0.2569695 | 1.928   | 0.3956261 | 2.09    | 0.32187  | 2.46     | 0.2770078 | 2.522   | 1.17799 |
| Pitpnm2  | 8.70666667 | 0.7956339 | 9.634   | 0.788974  | 10.66   | 1.254372 | 12.57    | 1.4813732 | 13.832  | 0.97996 |
| Rpl39l   | 1.51       | 0.5556078 | 1.882   | 0.9479821 | 2.108   | 0.714682 | 2.4125   | 0.3516983 | 2.628   | 1.04982 |
| Ago1     | 11.79      | 0.2884441 | 12.812  | 0.5690079 | 12.926  | 0.896817 | 13.94    | 2.3177719 | 15.446  | 1.60615 |
| Mbtps1   | 28.94      | 1.2901163 | 30.644  | 1.2272449 | 32.326  | 2.335857 | 33.395   | 1.9323474 | 34.81   | 2.39599 |
| Fam129b  | 195.123333 | 19.982078 | 211.572 | 11.132227 | 232.262 | 18.63886 | 235.955  | 22.857918 | 237.99  | 22.9976 |
| Birc2    | 7.47333333 | 1.3893284 | 8.056   | 0.4290455 | 8.67    | 1.143328 | 8.7575   | 0.4360715 | 9.388   | 1.18984 |
| Abca2    | 6.44       | 0.2088061 | 8.06    | 0.6776061 | 8.08    | 0.736105 | 8.8525   | 1.6742436 | 9.542   | 0.31356 |
| Gm46735  | 0.95333333 | 0.1484363 | 1.038   | 0.1704993 | 1.326   | 0.243578 | 1.3575   | 0.199729  | 1.56    | 0.27758 |
| Isoc1    | 28.8766667 | 3.0730495 | 29.654  | 1.5953777 | 31.24   | 2.530978 | 31.3475  | 3.8814548 | 31.426  | 4.24254 |
| Abi2     | 2.42       | 0.2615339 | 2.478   | 0.1921458 | 2.658   | 0.275264 | 2.9625   | 0.3347014 | 3.034   | 0.615   |

|          |            |           |        |           |         |          |          |           |         |         |
|----------|------------|-----------|--------|-----------|---------|----------|----------|-----------|---------|---------|
| S1pr4    | 1.92       | 0.4158125 | 2.114  | 0.3656911 | 2.392   | 0.621989 | 2.405    | 0.2101587 | 2.676   | 0.32989 |
| Traf3    | 5.17333333 | 0.3100538 | 5.622  | 0.4844791 | 6.106   | 0.331783 | 6.35     | 0.3311596 | 6.5     | 0.61514 |
| Hexb     | 23.6233333 | 2.0013579 | 25.574 | 1.7572791 | 27.92   | 2.520476 | 28.09    | 3.5431342 | 30.936  | 3.05477 |
| Insl6    | 1.43333333 | 0.2800595 | 1.696  | 0.4231784 | 2.296   | 0.42069  | 2.66     | 0.5352258 | 2.732   | 0.37493 |
| Etl4     | 8.11666667 | 0.3629509 | 10.414 | 0.6429075 | 10.572  | 1.36201  | 10.9825  | 1.5064168 | 10.984  | 1.59259 |
| Psen2    | 2.92666667 | 0.6468642 | 3.48   | 0.668618  | 4.11    | 0.292575 | 4.2075   | 0.9013832 | 4.536   | 0.81356 |
| Cdk13    | 9.54       | 0.8750429 | 10.21  | 0.2719375 | 10.516  | 1.002213 | 10.8925  | 0.8062826 | 10.93   | 0.94623 |
| Dsg2     | 6.02333333 | 0.6633501 | 6.604  | 0.807267  | 8.916   | 1.057677 | 9.8475   | 1.2941761 | 11.19   | 0.5721  |
| Ift74    | 3.41       | 0.4877499 | 3.604  | 0.2799643 | 3.704   | 0.45687  | 3.795    | 0.7552704 | 3.832   | 0.72606 |
| Abca4    | 0.20666667 | 0.061101  | 0.276  | 0.0304959 | 0.38    | 0.104163 | 0.47     | 0.1430618 | 0.502   | 0.13953 |
| Inpp5e   | 6.15666667 | 0.465224  | 7.53   | 0.4817157 | 7.642   | 0.935612 | 7.8425   | 1.0379908 | 8.15    | 0.47397 |
| Repin1   | 2.9        | 0.1905256 | 3.642  | 0.5918361 | 3.71    | 0.562361 | 3.8325   | 0.2794489 | 4.458   | 0.58581 |
| Unc93b1  | 3.21666667 | 0.4050103 | 3.646  | 0.582134  | 3.96    | 0.658863 | 4.9175   | 0.4001146 | 5.09    | 1.40586 |
| Arsb     | 3.16       | 0.5750652 | 4.536  | 0.1886266 | 4.558   | 0.363483 | 5.1825   | 0.5259515 | 6.288   | 1.47573 |
| Fam102a  | 14.52      | 0.8623804 | 14.572 | 1.4068653 | 17.74   | 2.190605 | 17.7925  | 2.3541931 | 18.036  | 1.23719 |
| Slc12a4  | 14.5866667 | 1.84549   | 15.782 | 1.2472249 | 17.532  | 1.435294 | 19.165   | 0.6347966 | 19.326  | 0.82875 |
| Rhobtb1  | 3.85666667 | 0.6414307 | 4.12   | 0.7804166 | 4.404   | 0.700914 | 4.715    | 0.8503529 | 4.956   | 0.52714 |
| Gdf10    | 1.4        | 0.298161  | 1.706  | 0.4030261 | 2.076   | 0.64248  | 2.4925   | 1.2408969 | 3.254   | 1.74649 |
| Nfya     | 10.2566667 | 0.4916638 | 12.636 | 1.2188232 | 12.732  | 0.700121 | 12.765   | 1.5139463 | 13.674  | 1.63099 |
| Usp53    | 2.56333333 | 0.4350096 | 3.798  | 0.4928184 | 3.994   | 0.730705 | 4.3225   | 0.5484752 | 4.724   | 1.00674 |
| Ncor2    | 21.6       | 3.1314374 | 23.882 | 2.5857243 | 28.828  | 2.996259 | 29.3925  | 2.8812656 | 34.618  | 2.18541 |
| BC048403 | 3.94333333 | 0.2212088 | 4.214  | 0.252349  | 4.358   | 0.222306 | 4.4175   | 0.419871  | 4.726   | 0.32129 |
| Rgs10    | 16.7633333 | 1.0635005 | 18.788 | 5.1325793 | 19.606  | 2.446228 | 20.37    | 1.9447879 | 22.476  | 6.32076 |
| Crtc1    | 5.32       | 0.9083502 | 5.428  | 0.6983337 | 5.476   | 0.55788  | 5.9175   | 0.5671787 | 6.528   | 0.27096 |
| Zmynd11  | 23.8433333 | 3.3923492 | 27.308 | 1.4860922 | 27.956  | 2.014058 | 28.725   | 2.1141034 | 30.138  | 3.91013 |
| Dennd4b  | 1.15       | 0.1587451 | 1.548  | 0.2041323 | 1.606   | 0.236495 | 1.725    | 0.2392349 | 1.754   | 0.33842 |
| Jag2     | 44.3033333 | 6.5978355 | 48.716 | 4.1172236 | 50.582  | 5.500143 | 59.105   | 4.3251397 | 59.742  | 5.92419 |
| Zfp3612  | 96.6233333 | 20.929893 | 98.53  | 7.1325311 | 122.044 | 16.81721 | 124.6525 | 24.396146 | 128.876 | 9.41626 |
| Proser1  | 5.93666667 | 0.59769   | 6.184  | 0.3063984 | 6.59    | 0.46984  | 6.8175   | 0.5804811 | 6.938   | 0.64013 |
| Nectin3  | 9.05       | 0.4491102 | 10.964 | 2.61104   | 11.166  | 3.442917 | 14.0825  | 3.1118631 | 14.338  | 4.64158 |
| Ksr1     | 5.51333333 | 0.6123997 | 6.238  | 0.4955502 | 7.984   | 0.88308  | 8.5025   | 1.0892314 | 10.562  | 1.1639  |
| Ii11     | 1.31333333 | 0.102632  | 1.352  | 0.1478851 | 1.372   | 0.435339 | 1.4675   | 0.4096645 | 1.928   | 0.2056  |
| Tbc1d16  | 2.82333333 | 0.3257811 | 3.306  | 0.4847989 | 3.662   | 0.572512 | 3.965    | 1.0859251 | 4.116   | 0.20045 |
| Zfp40    | 0.66333333 | 0.3002221 | 0.896  | 0.1432829 | 1.034   | 0.313576 | 1.0375   | 0.2748788 | 1.104   | 0.25116 |
| Mapt     | 0.65666667 | 0.0550757 | 0.776  | 0.1188697 | 0.808   | 0.151888 | 1.0875   | 0.1584035 | 1.11    | 0.09747 |
| Cnot6l   | 11.0366667 | 1.7254661 | 11.312 | 0.7394728 | 11.67   | 1.640015 | 11.92    | 1.3157507 | 12.156  | 1.74474 |
| Galnt11  | 5.88333333 | 0.340196  | 6.614  | 0.9260292 | 7.196   | 0.54743  | 7.2825   | 0.2478407 | 8.1     | 0.48394 |
| Nsun3    | 3.49666667 | 0.3156475 | 3.502  | 0.3503141 | 3.608   | 0.477619 | 4.2925   | 0.4803037 | 4.632   | 0.19652 |
| Nudt18   | 11         | 1.0514752 | 11.818 | 1.3399328 | 12.706  | 1.718598 | 14.2675  | 2.7866034 | 14.576  | 1.73523 |
| Il6st    | 15.12      | 1.0129659 | 17.634 | 1.30617   | 21.314  | 2.973782 | 22.2     | 2.7362383 | 23.54   | 4.06229 |
| St3gal6  | 2.75666667 | 0.6373644 | 3.774  | 0.3389395 | 4.252   | 0.627909 | 4.6125   | 0.4608235 | 4.956   | 0.87392 |
| Pam      | 16.6233333 | 0.7606138 | 21.67  | 1.8785633 | 23.098  | 0.6001   | 24.6275  | 2.3012804 | 25.402  | 2.14976 |
| Mfn2     | 15.1033333 | 0.7950052 | 17.966 | 0.8325443 | 19.992  | 1.116566 | 20.7475  | 1.0193912 | 20.802  | 0.55639 |
| Atp2b4   | 23.31      | 0.6091798 | 27.296 | 3.1783691 | 27.93   | 3.161874 | 31.36    | 7.0611519 | 39.86   | 4.52624 |
| Bche     | 1.14666667 | 0.2592939 | 1.388  | 0.3747933 | 1.404   | 0.225455 | 1.565    | 0.4587301 | 2.026   | 0.93131 |
| Zbtb34   | 1.59333333 | 0.1193035 | 1.72   | 0.1587451 | 1.788   | 0.109179 | 1.9075   | 0.2737852 | 1.966   | 0.17387 |
| Usp11    | 1.1        | 0.1452584 | 1.128  | 0.1829481 | 1.262   | 0.180056 | 1.4875   | 0.2406069 | 1.53    | 0.37762 |

|           |             |           |         |           |         |          |         |           |         |         |
|-----------|-------------|-----------|---------|-----------|---------|----------|---------|-----------|---------|---------|
| Ppp1r3e   | 1.59        | 0.1276715 | 1.812   | 0.2162637 | 1.99    | 0.310081 | 2.17    | 0.3258834 | 2.34    | 0.42149 |
| Cyp2g1    | 122.6233333 | 68.324308 | 178.766 | 83.65538  | 243.752 | 120.2483 | 289.945 | 96.769341 | 348.208 | 204.404 |
| Llg1l     | 23.12       | 1.780674  | 24.436  | 0.5722587 | 24.602  | 1.714138 | 24.66   | 0.9314505 | 26.09   | 1.34242 |
| Parp16    | 2.6         | 0.1802776 | 2.878   | 0.2217431 | 3.234   | 0.209833 | 3.405   | 0.0888819 | 3.448   | 0.58041 |
| Ifnlr1    | 7.44        | 0.7427651 | 7.628   | 0.6594467 | 7.804   | 0.767939 | 8.0625  | 1.4407492 | 8.854   | 0.62748 |
| Prr3      | 7.43        | 0.3386739 | 7.628   | 0.5095783 | 8.456   | 1.13293  | 9.03    | 1.1951848 | 9.082   | 0.97135 |
| Mbnl2     | 34          | 5.8439969 | 38.652  | 3.3222086 | 40.322  | 5.506493 | 41.8075 | 3.1677161 | 41.808  | 6.29088 |
| Parp4     | 2.53666667  | 0.1715615 | 3.796   | 0.3752732 | 4.566   | 0.151756 | 4.6275  | 0.662187  | 4.898   | 0.78941 |
| Sun1      | 31.9166667  | 1.4315143 | 34.628  | 1.9466561 | 36.634  | 3.377829 | 36.7475 | 4.0424611 | 38.732  | 2.96712 |
| Unc79     | 0.36666667  | 0.0057735 | 0.486   | 0.1232071 | 0.658   | 0.117346 | 0.7775  | 0.1813606 | 0.91    | 0.16    |
| Fam172a   | 13.74       | 1.3509996 | 16.236  | 1.1752149 | 16.434  | 2.478806 | 16.82   | 0.9683319 | 17.12   | 1.63388 |
| Bicra     | 7.57666667  | 0.462313  | 7.63    | 0.4925444 | 7.72    | 0.706682 | 8.5125  | 0.7831294 | 8.84    | 0.49975 |
| Elf1      | 16.23       | 0.6444377 | 17.094  | 0.906245  | 18.528  | 1.779626 | 19.0375 | 1.7872208 | 19.252  | 2.04882 |
| Ncoa6     | 7.18666667  | 0.4921721 | 8.12    | 0.4770744 | 8.362   | 0.377783 | 8.475   | 1.4358853 | 9.394   | 1.20053 |
| Ncoa1     | 5.71666667  | 0.3338163 | 6.798   | 0.2626214 | 6.842   | 0.476624 | 7.2725  | 0.9783106 | 7.398   | 1.02383 |
| Socs7     | 4.43333333  | 0.3635015 | 5.112   | 0.5004198 | 5.414   | 0.539333 | 5.66    | 0.9496315 | 6.082   | 0.56442 |
| Atg2a     | 14.6666667  | 1.5093155 | 14.918  | 0.9651787 | 15.026  | 1.944127 | 15.4575 | 2.4825575 | 17.614  | 1.23001 |
| Celf4     | 1.80333333  | 0.267644  | 2.41    | 0.2522895 | 2.572   | 0.544077 | 2.6975  | 0.3490344 | 2.836   | 0.31469 |
| Ngfr      | 9.87        | 0.5841233 | 10.544  | 1.5561266 | 11.378  | 4.350468 | 16.8325 | 4.4756257 | 17.312  | 3.48666 |
| Ppp6r3    | 19.72       | 0.3504283 | 20.462  | 0.3785763 | 20.672  | 0.734758 | 20.9775 | 1.1594072 | 21.304  | 0.69284 |
| Gatad2b   | 11.42       | 0.5164301 | 12.064  | 0.5334604 | 12.522  | 0.898426 | 12.9175 | 1.448295  | 13.322  | 1.04342 |
| Gtf3c3    | 3.65666667  | 0.466083  | 4.038   | 0.17936   | 4.15    | 0.359374 | 4.205   | 0.2769476 | 4.22    | 0.35157 |
| Smarcd1   | 9.06666667  | 0.9404432 | 9.976   | 0.6817111 | 10.276  | 0.940681 | 10.4275 | 0.4610405 | 10.51   | 0.61057 |
| Sh2d4a    | 13.0866667  | 2.5057201 | 14.36   | 1.0244999 | 15.226  | 2.244656 | 15.42   | 1.8444331 | 18.952  | 1.76889 |
| Ppip5k1   | 5.95666667  | 0.258908  | 6.48    | 0.7736924 | 6.756   | 1.012215 | 7.56    | 1.3694524 | 7.64    | 0.716   |
| Fam20a    | 0.81666667  | 0.1101514 | 1.122   | 0.4775144 | 1.324   | 0.174011 | 1.4525  | 0.2209638 | 1.534   | 0.41052 |
| Lamb3     | 43.51       | 4.8741871 | 47.734  | 3.3825848 | 49.498  | 9.655528 | 51.145  | 7.728193  | 53.404  | 8.83565 |
| Gm15411   | 5.7         | 0.7801923 | 7.44    | 0.5485891 | 8.504   | 1.085693 | 8.8275  | 2.1360926 | 9.614   | 1.0691  |
| Wfikkn1   | 0.66        | 0.0458258 | 0.678   | 0.1255787 | 0.698   | 0.185796 | 0.89    | 0.2580698 | 0.918   | 0.17398 |
| Bid       | 2.33333333  | 0.6357148 | 2.426   | 0.3861088 | 2.922   | 0.457734 | 3.2725  | 0.8517189 | 3.644   | 0.53313 |
| Csrnp2    | 2.64        | 0.4288356 | 3.27    | 0.7567364 | 3.81    | 1.005783 | 4.14    | 0.8529556 | 4.658   | 0.46338 |
| Ptpn14    | 11.3566667  | 1.3707419 | 13.728  | 1.7827423 | 15.01   | 3.545751 | 16.855  | 4.4730042 | 20.336  | 4.07032 |
| Rcbtb1    | 2.99333333  | 0.3754109 | 3.876   | 0.5094409 | 3.93    | 0.4255   | 4.1975  | 0.2860507 | 4.234   | 0.6869  |
| Myo6      | 10.3866667  | 1.0184465 | 11.832  | 0.4710308 | 12.138  | 1.731898 | 12.7875 | 1.6988305 | 14.04   | 1.19996 |
| Tshz3     | 0.58666667  | 0.141892  | 0.874   | 0.2917705 | 1.096   | 0.082644 | 1.305   | 0.06245   | 1.546   | 0.34645 |
| Gadd45b   | 17.4533333  | 0.8984616 | 18.044  | 2.2901376 | 18.914  | 1.318571 | 19.7    | 2.0842745 | 24.234  | 2.29954 |
| Sppl2a    | 15.94       | 1.9214838 | 18.3    | 1.0563853 | 19.244  | 2.146574 | 19.8925 | 1.899059  | 20.084  | 2.50213 |
| Atp8a1    | 3.61666667  | 0.500533  | 3.804   | 0.6665058 | 3.818   | 0.419845 | 3.9375  | 0.747323  | 4.134   | 1.5211  |
| Fads2     | 1.81        | 0.1473092 | 2.07    | 0.6395702 | 2.116   | 0.377664 | 2.335   | 0.3218178 | 2.742   | 0.93422 |
| Gm3045    | 0.76666667  | 0.1497776 | 1.018   | 0.101341  | 1.184   | 0.248455 | 1.22    | 0.237206  | 1.398   | 0.18213 |
| Serpina3m | 0.63666667  | 0.1115049 | 0.938   | 0.3076036 | 1.142   | 0.201047 | 1.3825  | 0.4718315 | 1.63    | 0.27659 |
| Fam129c   | 0.72666667  | 0.080829  | 0.904   | 0.3674643 | 0.96    | 0.152807 | 1.105   | 0.2004162 | 1.264   | 0.2122  |
| Kcnj16    | 1.52        | 0.2364318 | 2.13    | 0.6526485 | 2.262   | 0.647086 | 2.625   | 0.7628674 | 2.756   | 0.57657 |
| Nrp2      | 4.45666667  | 0.4366158 | 5.544   | 1.4112689 | 5.888   | 1.034369 | 6.1425  | 0.7636044 | 6.982   | 3.12004 |
| Ermard    | 5.12333333  | 0.8152505 | 6.664   | 1.1158539 | 6.69    | 0.715577 | 6.9825  | 0.7945387 | 7.112   | 0.64569 |
| Zfp687    | 6.23333333  | 0.1755942 | 6.322   | 0.3134805 | 6.722   | 0.520932 | 7.0125  | 0.5819149 | 7.186   | 0.51641 |
| Man2a2    | 10.57       | 0.5729747 | 11.842  | 1.9874406 | 11.9    | 1.269311 | 12.6275 | 1.0191622 | 15.968  | 3.40697 |

|           |             |           |        |           |        |          |         |           |        |         |
|-----------|-------------|-----------|--------|-----------|--------|----------|---------|-----------|--------|---------|
| Cd209c    | 2.92666667  | 0.9263549 | 3.678  | 0.5804912 | 3.694  | 0.465918 | 3.715   | 0.7169147 | 3.968  | 0.80397 |
| Acp2      | 4.23666667  | 0.3458805 | 6.036  | 0.6406091 | 6.234  | 0.354796 | 6.4     | 0.3256788 | 6.45   | 1.13276 |
| Tfcp2     | 2.73666667  | 0.3194266 | 3.492  | 0.5386743 | 3.676  | 0.276369 | 3.99    | 0.2952965 | 4.372  | 0.23392 |
| Cluap1    | 9.38666667  | 0.7552704 | 9.61   | 0.6337586 | 9.822  | 0.65956  | 10.0625 | 0.534626  | 10.432 | 0.82415 |
| Tshz2     | 3.16666667  | 0.0802081 | 3.82   | 0.8033368 | 3.826  | 0.538359 | 4.19    | 0.8397222 | 4.592  | 1.06701 |
| Rnf44     | 28.54333333 | 1.3387432 | 32.508 | 0.5859778 | 35.33  | 1.939845 | 35.365  | 3.0773853 | 35.426 | 1.50129 |
| Iigp1     | 0.95        | 0.2696294 | 1.362  | 0.548425  | 1.73   | 0.531977 | 1.88    | 0.5367184 | 1.896  | 1.2171  |
| Atat1     | 3.97        | 0.3004996 | 5.454  | 0.812053  | 5.506  | 0.677001 | 6.4125  | 1.1083133 | 6.726  | 0.78564 |
| Sh2b3     | 7.03666667  | 0.4140451 | 8.576  | 0.8654652 | 9.032  | 0.471614 | 9.775   | 1.0454186 | 9.99   | 1.36228 |
| Tpbgl     | 0.65666667  | 0.0550757 | 0.922  | 0.248133  | 1.028  | 0.202163 | 1.1425  | 0.1878608 | 1.31   | 0.36661 |
| Ndst2     | 9.01333333  | 0.7046512 | 9.362  | 0.7708242 | 10.238 | 0.683608 | 10.2725 | 0.6443795 | 10.29  | 0.61404 |
| Phf21b    | 0.88        | 0.2306513 | 1.03   | 0.2568073 | 1.102  | 0.185526 | 1.31    | 0.171075  | 1.316  | 0.1148  |
| Pan3      | 11.7866667  | 2.2604056 | 13.942 | 1.1404034 | 14.212 | 2.044559 | 14.795  | 2.4994999 | 15.34  | 1.53299 |
| Trmt9b    | 1.15333333  | 0.1234234 | 1.288  | 0.4496888 | 1.44   | 0.2745   | 1.7025  | 0.4600996 | 2.028  | 0.28735 |
| AI464131  | 1.7         | 0.3465545 | 1.95   | 0.4226109 | 2.02   | 0.432204 | 2.325   | 0.3764306 | 2.672  | 0.91188 |
| Znrf1     | 15.32333333 | 1.5215234 | 15.652 | 2.7955178 | 17.616 | 2.607946 | 18.5625 | 2.4122794 | 21.278 | 1.42596 |
| Abl1      | 8.95        | 1.1301327 | 10.576 | 0.7401554 | 10.788 | 0.38713  | 11.285  | 0.7128581 | 11.44  | 1.22888 |
| Serpina3f | 3.11        | 0.3080584 | 4.276  | 0.9933932 | 5.156  | 1.668991 | 5.4     | 0.9708072 | 7.334  | 1.4259  |
| Mmgt2     | 5.11333333  | 0.6676326 | 5.576  | 0.4557741 | 6.974  | 0.684931 | 7.715   | 0.5214403 | 9.36   | 1.62747 |
| Cherp     | 22.63       | 0.9986491 | 22.886 | 0.8824851 | 24.784 | 1.239931 | 24.985  | 1.5202302 | 25.242 | 2.26274 |
| Tpmt      | 1.84666667  | 0.6568358 | 2.334  | 0.2405826 | 2.398  | 0.415897 | 2.43    | 0.1529706 | 2.48   | 0.5098  |
| Prrc2a    | 63.92       | 5.2702277 | 63.944 | 2.496874  | 64.6   | 4.128589 | 66.9225 | 5.1091707 | 72.658 | 4.27349 |
| Fam76a    | 11.13333333 | 0.2328805 | 14.154 | 1.0559261 | 14.376 | 1.178147 | 15.4825 | 1.7080666 | 15.794 | 1.60458 |
| Cyp2j6    | 15.67       | 2.1806192 | 15.864 | 1.1564299 | 16.62  | 2.081442 | 19.3975 | 3.685199  | 22.068 | 1.06305 |

Table S2

| gene_symbol | 1M      |        | 2M      |        | 6M      |        | 12M     |        | 20M     |        |
|-------------|---------|--------|---------|--------|---------|--------|---------|--------|---------|--------|
|             | MEAN    | SD     |
| Yars        | 31.36   | 3.24   | 26.69   | 3.75   | 26.13   | 3.75   | 22.43   | 4.60   | 22.22   | 2.66   |
| Lgals7      | 6932.91 | 676.53 | 5679.47 | 347.61 | 5201.79 | 268.82 | 4561.25 | 508.48 | 4010.03 | 873.65 |
| Pank1       | 18.67   | 3.11   | 16.61   | 2.86   | 15.09   | 2.44   | 14.76   | 3.95   | 14.73   | 4.79   |
| Kyat1       | 42.47   | 6.62   | 37.54   | 2.63   | 34.18   | 2.39   | 33.61   | 2.03   | 31.34   | 3.09   |
| Eif4e2      | 50.81   | 3.47   | 45.85   | 3.47   | 42.89   | 3.02   | 42.26   | 2.83   | 37.75   | 3.03   |
| Carmil2     | 0.59    | 0.21   | 0.49    | 0.18   | 0.49    | 0.06   | 0.40    | 0.12   | 0.38    | 0.07   |
| Psmc12      | 55.95   | 4.05   | 54.90   | 6.06   | 54.76   | 4.83   | 54.43   | 9.53   | 49.76   | 4.49   |
| Spink7      | 4.52    | 3.33   | 2.81    | 0.60   | 2.77    | 2.13   | 1.08    | 0.52   | 0.48    | 0.31   |
| Psmg3       | 18.12   | 1.33   | 16.03   | 1.97   | 15.85   | 1.34   | 15.25   | 3.39   | 14.32   | 2.08   |
| Cmc2        | 9.14    | 1.97   | 8.45    | 0.79   | 8.25    | 1.00   | 6.90    | 0.83   | 5.72    | 0.71   |
| Pxmp4       | 101.80  | 4.94   | 81.10   | 18.59  | 76.47   | 12.72  | 69.60   | 10.73  | 56.91   | 16.83  |
| Cyp4f39     | 94.26   | 2.65   | 79.32   | 4.17   | 71.40   | 10.22  | 60.92   | 3.10   | 59.84   | 4.54   |
| Gstal       | 9.35    | 2.55   | 8.17    | 2.61   | 6.41    | 2.96   | 5.93    | 0.98   | 3.69    | 0.96   |
| Hars        | 84.73   | 0.56   | 82.03   | 11.56  | 75.43   | 5.41   | 72.18   | 10.48  | 70.27   | 8.30   |
| Elob        | 267.32  | 16.15  | 265.73  | 15.53  | 255.61  | 22.62  | 235.26  | 11.20  | 207.88  | 17.44  |
| Vps36       | 38.07   | 3.92   | 36.17   | 2.15   | 35.04   | 1.79   | 29.79   | 1.60   | 28.42   | 1.10   |
| Bambi       | 0.80    | 0.19   | 0.72    | 0.23   | 0.70    | 0.12   | 0.69    | 0.16   | 0.54    | 0.16   |
| Polr2l      | 39.44   | 2.94   | 36.95   | 3.32   | 34.06   | 2.61   | 33.99   | 3.98   | 26.53   | 3.72   |
| Taf9        | 58.64   | 8.85   | 57.02   | 4.42   | 56.51   | 5.10   | 56.41   | 7.72   | 51.14   | 5.28   |
| Atp6v0e     | 180.22  | 5.16   | 172.98  | 8.58   | 166.17  | 10.70  | 164.92  | 10.54  | 141.21  | 8.06   |
| Haus8       | 8.07    | 0.57   | 7.78    | 1.09   | 6.89    | 1.64   | 5.76    | 0.41   | 5.65    | 0.90   |
| Ttc22       | 13.99   | 1.25   | 11.34   | 0.99   | 10.95   | 0.85   | 9.54    | 1.41   | 9.46    | 1.10   |
| Slc2a6      | 2.88    | 0.28   | 2.87    | 0.60   | 2.67    | 0.44   | 2.61    | 0.64   | 2.52    | 0.33   |
| Tomm6       | 185.15  | 14.58  | 141.81  | 7.80   | 132.84  | 13.73  | 129.63  | 14.92  | 122.07  | 11.98  |
| Cybrd1      | 0.67    | 0.07   | 0.55    | 0.18   | 0.43    | 0.12   | 0.34    | 0.12   | 0.32    | 0.10   |
| Aadacl4     | 18.89   | 5.23   | 13.87   | 5.25   | 13.41   | 6.61   | 11.48   | 5.46   | 10.95   | 7.85   |
| Eif2b1      | 28.34   | 2.06   | 25.69   | 1.15   | 23.97   | 1.35   | 22.65   | 3.13   | 21.05   | 1.21   |
| Tbc1d10a    | 42.29   | 6.73   | 37.90   | 1.20   | 37.27   | 2.00   | 36.69   | 1.54   | 35.75   | 3.86   |
| Lpar5       | 10.66   | 1.64   | 10.08   | 0.87   | 9.75    | 0.60   | 9.63    | 0.69   | 9.60    | 1.12   |
| Ube2s       | 129.44  | 12.84  | 124.66  | 13.50  | 108.12  | 15.29  | 96.99   | 8.94   | 90.89   | 7.77   |
| Atp5b       | 550.57  | 20.48  | 534.71  | 51.78  | 524.93  | 34.17  | 517.70  | 47.05  | 430.63  | 25.11  |
| Snta1       | 6.02    | 1.16   | 5.24    | 1.44   | 5.08    | 0.79   | 5.06    | 0.20   | 4.24    | 0.79   |
| Rdh12       | 91.12   | 2.28   | 78.54   | 4.85   | 71.86   | 5.45   | 65.12   | 1.47   | 62.65   | 2.91   |
| Cks1b       | 34.91   | 1.07   | 33.10   | 3.91   | 31.92   | 3.34   | 30.44   | 4.16   | 25.51   | 3.53   |
| Col1a1      | 143.81  | 52.68  | 100.04  | 45.40  | 60.21   | 38.35  | 44.62   | 8.97   | 31.50   | 10.34  |
| Hist3h2ba   | 2.06    | 0.48   | 1.44    | 0.46   | 1.20    | 0.35   | 0.92    | 0.31   | 0.89    | 0.34   |
| St3gal4     | 11.28   | 2.10   | 11.02   | 1.88   | 10.49   | 1.59   | 9.79    | 2.83   | 9.51    | 1.03   |
| C1qtnf6     | 5.84    | 1.62   | 2.49    | 0.91   | 2.41    | 0.64   | 1.66    | 0.23   | 1.44    | 0.39   |
| Teddm3      | 63.30   | 4.51   | 48.20   | 13.24  | 44.43   | 8.17   | 43.30   | 12.85  | 35.74   | 10.35  |
| Col4a3      | 0.57    | 0.14   | 0.45    | 0.13   | 0.20    | 0.03   | 0.19    | 0.06   | 0.16    | 0.07   |
| Gpr89       | 11.86   | 0.91   | 11.69   | 1.31   | 11.17   | 0.74   | 10.85   | 0.63   | 9.60    | 0.54   |
| Atp5o       | 249.77  | 6.36   | 244.01  | 15.27  | 237.43  | 6.33   | 214.74  | 11.65  | 213.57  | 9.40   |
| Far2        | 204.21  | 39.01  | 200.20  | 58.64  | 131.63  | 45.83  | 126.49  | 53.80  | 115.19  | 59.69  |
| Ccnd3       | 44.18   | 4.82   | 42.61   | 3.14   | 41.04   | 5.22   | 36.32   | 1.99   | 33.85   | 1.23   |

|           |         |       |         |        |         |        |         |        |         |       |
|-----------|---------|-------|---------|--------|---------|--------|---------|--------|---------|-------|
| Ppa1      | 82.97   | 7.40  | 78.80   | 11.73  | 75.53   | 9.81   | 74.44   | 22.78  | 53.96   | 7.12  |
| Slc25a5   | 403.92  | 23.05 | 373.64  | 37.61  | 365.29  | 26.22  | 348.73  | 34.25  | 310.76  | 16.78 |
| Nrbp1     | 65.55   | 1.25  | 65.21   | 3.09   | 65.01   | 2.45   | 63.96   | 2.34   | 58.70   | 3.70  |
| Foxe1     | 0.92    | 0.51  | 0.24    | 0.13   | 0.23    | 0.24   | 0.23    | 0.12   | 0.14    | 0.11  |
| Malsu1    | 16.68   | 0.73  | 14.35   | 0.96   | 14.25   | 1.36   | 14.18   | 2.15   | 13.56   | 0.56  |
| Urod      | 37.95   | 3.87  | 35.22   | 4.04   | 33.40   | 2.18   | 33.05   | 3.13   | 28.02   | 4.81  |
| Rpl7a     | 1362.79 | 87.42 | 1353.99 | 30.03  | 1316.35 | 53.47  | 1287.11 | 101.59 | 1233.05 | 72.58 |
| Mcat      | 7.06    | 0.90  | 6.91    | 0.89   | 6.64    | 0.58   | 6.60    | 0.24   | 6.11    | 0.67  |
| Fabp5     | 1246.35 | 40.51 | 1035.23 | 132.90 | 917.97  | 128.35 | 700.32  | 123.75 | 639.65  | 87.13 |
| Agl       | 3.93    | 0.29  | 3.25    | 0.37   | 3.18    | 0.63   | 3.17    | 0.52   | 3.06    | 0.79  |
| Tarbp2    | 22.69   | 1.61  | 21.85   | 1.87   | 21.59   | 1.13   | 21.20   | 2.10   | 18.92   | 2.30  |
| Edc3      | 12.04   | 0.58  | 11.37   | 0.61   | 10.97   | 0.28   | 10.69   | 0.35   | 10.05   | 0.78  |
| Hist1h2bc | 61.97   | 8.69  | 60.91   | 7.50   | 34.60   | 4.84   | 33.91   | 2.54   | 29.18   | 2.04  |
| Fam84a    | 79.99   | 2.38  | 68.83   | 4.51   | 68.28   | 8.43   | 62.22   | 8.50   | 61.13   | 1.11  |
| Sult2b1   | 181.80  | 18.45 | 161.30  | 17.31  | 139.52  | 20.00  | 116.48  | 18.88  | 111.77  | 21.84 |
| Mecr      | 20.88   | 0.54  | 19.74   | 1.66   | 18.62   | 1.02   | 18.05   | 2.07   | 17.55   | 1.35  |
| Gadd45g   | 11.44   | 1.99  | 9.55    | 2.70   | 9.36    | 1.91   | 9.20    | 2.40   | 7.02    | 1.77  |
| Brwd3     | 2.10    | 0.61  | 2.01    | 0.13   | 1.97    | 0.39   | 1.93    | 0.24   | 1.91    | 0.38  |
| Uchl3     | 82.66   | 11.06 | 78.01   | 9.05   | 75.16   | 13.78  | 64.06   | 17.73  | 61.16   | 4.81  |
| D11Wsu47e | 3.40    | 0.30  | 3.32    | 0.73   | 3.19    | 0.52   | 2.89    | 0.33   | 2.78    | 0.43  |
| Pa2g4     | 172.10  | 10.33 | 161.50  | 18.33  | 150.00  | 10.94  | 149.88  | 18.38  | 147.73  | 14.75 |
| Chchd10   | 37.28   | 1.41  | 33.75   | 5.01   | 27.08   | 4.15   | 23.69   | 6.03   | 20.95   | 6.07  |
| S100z     | 0.60    | 0.53  | 0.39    | 0.36   | 0.32    | 0.22   | 0.24    | 0.36   | 0.08    | 0.18  |
| Agpat3    | 73.31   | 5.28  | 66.38   | 7.91   | 61.49   | 4.64   | 58.24   | 4.27   | 55.04   | 4.40  |
| Aars      | 33.58   | 5.81  | 29.58   | 4.25   | 28.26   | 5.03   | 25.16   | 4.56   | 22.98   | 3.26  |
| Pdss2     | 4.54    | 0.79  | 3.41    | 0.75   | 3.25    | 0.30   | 3.12    | 0.40   | 2.77    | 0.56  |
| Hnmpab    | 211.33  | 9.17  | 206.68  | 16.35  | 205.28  | 16.05  | 203.86  | 22.83  | 191.41  | 22.56 |
| Adamts19  | 0.90    | 0.23  | 0.21    | 0.09   | 0.19    | 0.18   | 0.10    | 0.04   | 0.09    | 0.05  |
| Hnrnp1    | 138.91  | 10.30 | 129.89  | 6.18   | 127.73  | 3.14   | 127.41  | 5.41   | 119.45  | 8.49  |
| Unc119b   | 12.49   | 1.12  | 11.94   | 1.76   | 11.47   | 1.52   | 10.63   | 0.89   | 9.88    | 1.15  |
| Gps1      | 45.97   | 0.56  | 44.24   | 2.50   | 44.08   | 2.98   | 43.24   | 3.99   | 42.93   | 2.95  |
| Tmem79    | 91.58   | 10.65 | 85.52   | 3.30   | 77.46   | 4.45   | 75.63   | 5.99   | 75.16   | 8.87  |
| Hsd17b4   | 42.63   | 2.53  | 41.71   | 5.98   | 41.43   | 3.37   | 39.91   | 5.26   | 36.15   | 7.85  |
| Selenoh   | 39.64   | 4.46  | 38.84   | 5.24   | 29.83   | 3.67   | 29.59   | 1.12   | 26.23   | 4.24  |
| Vcp       | 169.50  | 2.12  | 163.11  | 12.61  | 155.95  | 7.07   | 144.55  | 8.36   | 144.50  | 6.51  |
| Hoxc13    | 10.15   | 1.48  | 6.92    | 1.65   | 6.87    | 2.04   | 6.75    | 1.02   | 5.95    | 1.33  |
| Ddx39     | 49.84   | 3.13  | 49.46   | 8.01   | 48.02   | 5.84   | 44.34   | 10.83  | 40.10   | 7.43  |
| Cks2      | 37.78   | 5.39  | 36.53   | 8.28   | 30.12   | 2.46   | 27.94   | 4.44   | 27.12   | 0.94  |
| Chac1     | 5.76    | 0.76  | 5.35    | 0.74   | 5.02    | 0.46   | 4.18    | 0.84   | 3.79    | 0.39  |
| Sparc     | 346.23  | 74.94 | 247.53  | 91.77  | 182.06  | 71.88  | 145.31  | 6.88   | 125.61  | 23.88 |
| Dohh      | 40.25   | 2.66  | 39.86   | 1.44   | 37.75   | 1.87   | 36.87   | 3.67   | 33.79   | 4.34  |
| Cox6a1    | 567.95  | 27.91 | 530.95  | 22.34  | 456.19  | 30.84  | 438.11  | 21.19  | 373.49  | 27.47 |
| Colla2    | 79.17   | 25.42 | 72.11   | 31.30  | 42.29   | 25.21  | 35.99   | 6.47   | 30.75   | 13.24 |
| Cyren     | 2.51    | 0.42  | 2.36    | 0.50   | 2.28    | 0.54   | 2.23    | 0.22   | 2.14    | 0.62  |
| Hax1      | 48.12   | 1.16  | 48.12   | 5.85   | 47.00   | 5.65   | 45.69   | 5.50   | 37.29   | 2.82  |
| Gstm7     | 2.03    | 0.29  | 1.42    | 0.42   | 0.92    | 0.46   | 0.91    | 0.45   | 0.74    | 0.14  |
| Sin3b     | 45.20   | 3.42  | 43.89   | 2.55   | 39.82   | 1.99   | 39.67   | 4.17   | 39.57   | 2.51  |

|              |        |       |        |       |        |       |        |       |        |       |
|--------------|--------|-------|--------|-------|--------|-------|--------|-------|--------|-------|
| Nt5e         | 12.94  | 0.97  | 12.69  | 1.95  | 11.54  | 2.08  | 11.50  | 1.62  | 11.21  | 2.80  |
| Ttr          | 4.97   | 0.50  | 4.56   | 1.02  | 4.04   | 0.90  | 3.22   | 1.89  | 2.00   | 0.53  |
| Snx3         | 132.11 | 9.37  | 124.07 | 6.83  | 120.57 | 9.03  | 117.91 | 6.05  | 112.65 | 2.18  |
| Acox1        | 22.97  | 3.14  | 10.34  | 2.87  | 6.73   | 1.86  | 6.50   | 1.94  | 6.09   | 1.78  |
| Col4a1       | 15.93  | 1.95  | 15.76  | 3.99  | 15.13  | 3.08  | 14.22  | 3.22  | 10.55  | 3.76  |
| Tuba4a       | 308.80 | 14.16 | 293.34 | 38.91 | 283.72 | 25.69 | 262.15 | 53.44 | 230.82 | 37.60 |
| Kcnj12       | 1.07   | 0.25  | 0.45   | 0.12  | 0.29   | 0.05  | 0.26   | 0.10  | 0.18   | 0.06  |
| Fgf21        | 0.54   | 0.12  | 0.26   | 0.21  | 0.24   | 0.10  | 0.18   | 0.10  | 0.13   | 0.10  |
| Cisd1        | 68.18  | 7.52  | 60.60  | 12.69 | 54.51  | 11.02 | 50.87  | 9.49  | 46.26  | 10.05 |
| Lap3         | 56.23  | 6.69  | 46.68  | 8.06  | 38.06  | 7.66  | 37.21  | 9.55  | 34.96  | 9.84  |
| Ttc39c       | 10.90  | 0.43  | 10.51  | 0.59  | 10.12  | 0.30  | 9.96   | 0.72  | 9.18   | 0.54  |
| Pbk          | 12.78  | 2.55  | 12.05  | 2.57  | 11.35  | 2.23  | 9.30   | 1.35  | 8.94   | 1.82  |
| Ebp          | 63.03  | 0.94  | 55.44  | 4.31  | 49.80  | 3.27  | 48.17  | 1.89  | 45.32  | 3.21  |
| Cryz12       | 5.12   | 0.52  | 3.79   | 0.49  | 3.00   | 0.47  | 2.60   | 0.42  | 2.24   | 0.26  |
| Lsm2         | 40.75  | 2.10  | 40.43  | 3.95  | 36.33  | 4.47  | 35.24  | 2.70  | 33.80  | 4.12  |
| Hmcn1        | 1.72   | 0.33  | 1.65   | 0.45  | 1.10   | 0.37  | 1.08   | 0.28  | 0.87   | 0.18  |
| Tars         | 40.97  | 1.09  | 39.28  | 5.53  | 39.23  | 5.23  | 38.25  | 8.75  | 33.97  | 2.95  |
| Nasp         | 33.00  | 5.60  | 32.08  | 2.95  | 29.96  | 2.91  | 29.82  | 3.84  | 28.57  | 4.72  |
| Acot1        | 58.19  | 3.34  | 49.27  | 10.65 | 41.71  | 7.00  | 40.78  | 3.06  | 29.44  | 6.37  |
| C9orf72      | 4.83   | 0.67  | 4.46   | 0.54  | 4.34   | 0.39  | 4.20   | 0.44  | 4.01   | 0.83  |
| Hnrnpm       | 75.30  | 4.52  | 75.29  | 6.15  | 71.89  | 4.43  | 71.04  | 3.13  | 69.29  | 4.55  |
| Pex11a       | 16.26  | 3.28  | 15.86  | 2.94  | 13.85  | 1.56  | 13.44  | 2.14  | 11.63  | 3.96  |
| Eif3b        | 120.94 | 7.29  | 118.88 | 12.11 | 116.87 | 5.39  | 116.02 | 15.91 | 106.87 | 10.91 |
| Rita1        | 5.64   | 1.05  | 5.63   | 0.61  | 5.05   | 0.50  | 4.84   | 0.72  | 4.71   | 0.25  |
| Metrl        | 34.14  | 2.65  | 31.07  | 2.35  | 30.77  | 2.19  | 27.29  | 1.29  | 25.26  | 1.48  |
| Cdkn2d       | 16.29  | 3.42  | 15.39  | 1.68  | 13.37  | 0.92  | 12.94  | 0.74  | 11.67  | 0.77  |
| Prkcs        | 47.45  | 4.08  | 43.78  | 2.61  | 38.60  | 2.14  | 38.55  | 1.62  | 37.49  | 3.56  |
| 0610009B22Ri | 19.22  | 1.86  | 18.11  | 0.59  | 17.57  | 1.40  | 17.15  | 0.59  | 16.12  | 1.61  |
| Nudt5        | 22.33  | 1.98  | 19.74  | 2.48  | 18.55  | 3.45  | 17.07  | 2.14  | 15.64  | 1.38  |
| Atg101       | 25.08  | 2.19  | 20.48  | 1.42  | 19.68  | 0.79  | 19.59  | 0.72  | 18.10  | 1.94  |
| 1700102P08Ri | 0.90   | 0.08  | 0.83   | 0.26  | 0.81   | 0.23  | 0.74   | 0.24  | 0.72   | 0.27  |
| Mrpl57       | 14.77  | 1.16  | 14.47  | 0.55  | 13.22  | 0.61  | 13.03  | 2.23  | 10.56  | 1.13  |
| Wdr83os      | 128.17 | 8.34  | 117.86 | 11.25 | 106.43 | 8.94  | 100.49 | 7.06  | 94.09  | 11.63 |
| Nhp2         | 155.31 | 9.38  | 153.14 | 13.37 | 131.44 | 9.48  | 128.14 | 23.67 | 103.56 | 16.90 |
| Nt5dc2       | 39.39  | 3.52  | 31.94  | 3.80  | 29.85  | 1.67  | 27.16  | 4.00  | 22.26  | 3.87  |
| Eif3g        | 139.11 | 3.63  | 136.38 | 8.86  | 133.54 | 8.05  | 131.65 | 16.51 | 122.83 | 12.67 |
| Tmem208      | 40.46  | 1.54  | 38.78  | 3.15  | 37.30  | 1.73  | 35.31  | 5.02  | 33.99  | 1.99  |
| Ngdn         | 26.84  | 1.13  | 26.70  | 2.60  | 25.99  | 1.91  | 22.68  | 3.55  | 22.32  | 1.70  |
| Ctsd         | 765.66 | 58.49 | 598.70 | 65.73 | 550.29 | 56.77 | 534.64 | 44.00 | 502.68 | 21.94 |
| Dolk         | 11.77  | 0.96  | 10.08  | 2.15  | 9.65   | 0.62  | 9.59   | 0.89  | 8.22   | 1.37  |
| Ahcy         | 25.69  | 0.41  | 24.42  | 4.14  | 23.92  | 3.70  | 17.99  | 2.74  | 17.78  | 2.34  |
| Cldn10       | 1.29   | 0.10  | 3.08   | 0.69  | 3.83   | 1.28  | 4.17   | 0.35  | 4.40   | 1.33  |
| Ms4a4d       | 0.37   | 0.14  | 1.46   | 0.43  | 2.06   | 0.51  | 2.40   | 0.61  | 3.02   | 1.57  |
| Aebp1        | 4.46   | 0.64  | 15.29  | 4.40  | 17.96  | 5.98  | 18.72  | 6.71  | 25.62  | 12.50 |
| Prdm8        | 0.22   | 0.04  | 0.35   | 0.11  | 0.40   | 0.09  | 0.79   | 0.23  | 0.88   | 0.50  |
| Cyp4v3       | 1.83   | 0.23  | 3.33   | 0.46  | 4.37   | 0.60  | 5.26   | 1.06  | 6.50   | 1.68  |
| Fbp2         | 0.38   | 0.18  | 0.77   | 0.22  | 0.99   | 0.45  | 1.31   | 0.35  | 1.53   | 0.38  |

|           |       |      |        |       |        |       |        |        |        |        |
|-----------|-------|------|--------|-------|--------|-------|--------|--------|--------|--------|
| Pde4b     | 4.84  | 0.38 | 7.45   | 0.94  | 9.94   | 1.06  | 9.97   | 1.36   | 13.46  | 4.01   |
| Shox2     | 0.87  | 0.38 | 1.83   | 0.62  | 1.88   | 0.40  | 1.98   | 0.45   | 2.33   | 1.24   |
| Dcn       | 50.84 | 8.96 | 175.85 | 49.28 | 199.49 | 92.15 | 252.77 | 100.48 | 299.51 | 173.07 |
| Zc4h2     | 0.45  | 0.13 | 0.69   | 0.13  | 0.77   | 0.31  | 0.78   | 0.25   | 0.83   | 0.32   |
| Gbp6      | 0.51  | 0.15 | 1.00   | 0.28  | 1.16   | 0.21  | 1.45   | 0.31   | 1.59   | 1.00   |
| Atp12a    | 3.00  | 0.50 | 16.88  | 3.71  | 17.41  | 2.90  | 22.38  | 2.04   | 41.48  | 10.12  |
| Cpq       | 1.34  | 0.46 | 2.04   | 0.68  | 2.25   | 0.63  | 2.44   | 0.54   | 2.63   | 1.39   |
| Ajm1      | 0.16  | 0.11 | 0.29   | 0.03  | 0.49   | 0.11  | 0.85   | 0.16   | 1.37   | 0.27   |
| C1qtnf5   | 0.77  | 0.12 | 1.38   | 0.47  | 1.50   | 0.65  | 1.60   | 0.35   | 1.87   | 1.00   |
| Gm5751    | 0.15  | 0.17 | 0.28   | 0.29  | 0.29   | 0.31  | 0.36   | 0.17   | 0.57   | 0.28   |
| Apo19b    | 0.52  | 0.24 | 0.70   | 0.30  | 1.13   | 0.36  | 1.38   | 0.50   | 1.39   | 0.35   |
| Npy1r     | 0.63  | 0.10 | 1.02   | 0.22  | 1.11   | 0.46  | 1.77   | 0.66   | 1.83   | 0.17   |
| Pi16      | 2.16  | 0.67 | 8.64   | 4.23  | 12.58  | 5.10  | 15.67  | 5.49   | 26.64  | 22.24  |
| Serping1  | 10.55 | 2.61 | 42.48  | 13.89 | 47.71  | 17.03 | 57.37  | 19.75  | 68.05  | 38.58  |
| Tnxb      | 4.85  | 0.88 | 12.73  | 3.70  | 13.04  | 2.95  | 16.28  | 1.37   | 17.90  | 3.18   |
| Dpyd      | 0.26  | 0.09 | 0.67   | 0.14  | 0.71   | 0.13  | 0.92   | 0.20   | 1.13   | 0.40   |
| Col23a1   | 8.62  | 0.66 | 18.86  | 3.12  | 20.44  | 1.78  | 24.42  | 1.16   | 27.63  | 0.27   |
| Sp100     | 2.25  | 0.42 | 4.11   | 0.80  | 5.71   | 0.95  | 6.06   | 0.28   | 6.54   | 1.71   |
| Arhgap6   | 0.19  | 0.11 | 0.44   | 0.15  | 0.52   | 0.13  | 0.57   | 0.06   | 0.60   | 0.23   |
| Ankrd6    | 0.49  | 0.09 | 0.75   | 0.05  | 0.83   | 0.09  | 1.18   | 0.10   | 1.25   | 0.23   |
| Gm21541   | 2.41  | 1.42 | 3.12   | 1.98  | 3.88   | 1.80  | 5.09   | 1.33   | 9.47   | 5.71   |
| Lama1     | 0.16  | 0.10 | 0.27   | 0.08  | 0.71   | 0.28  | 0.76   | 0.12   | 1.03   | 0.32   |
| Bco1      | 0.74  | 0.31 | 1.19   | 0.41  | 1.28   | 0.28  | 1.46   | 0.46   | 1.67   | 0.29   |
| Stmn2     | 0.68  | 0.19 | 1.41   | 0.60  | 1.98   | 0.82  | 2.28   | 0.38   | 3.50   | 1.38   |
| C1ra      | 0.90  | 0.19 | 3.58   | 1.03  | 4.47   | 2.06  | 6.24   | 1.77   | 7.52   | 4.68   |
| Rec114    | 0.27  | 0.15 | 0.56   | 0.20  | 0.58   | 0.25  | 0.64   | 0.16   | 0.74   | 0.46   |
| Prrt2     | 1.34  | 0.23 | 2.43   | 0.60  | 2.88   | 0.30  | 3.09   | 0.41   | 3.78   | 1.10   |
| Serpina3c | 0.56  | 0.37 | 1.43   | 0.58  | 2.12   | 0.83  | 2.24   | 0.56   | 3.69   | 2.57   |
| Cd68      | 7.99  | 1.19 | 12.68  | 0.81  | 13.52  | 2.02  | 13.89  | 2.40   | 15.35  | 3.56   |
| Flt3l     | 3.58  | 0.50 | 6.90   | 1.72  | 7.23   | 1.19  | 9.63   | 1.75   | 10.71  | 4.24   |
| Cyba      | 6.17  | 1.77 | 10.49  | 1.51  | 11.80  | 1.96  | 12.52  | 2.29   | 12.67  | 3.99   |
| Il7       | 0.50  | 0.11 | 0.52   | 0.13  | 0.86   | 0.17  | 1.08   | 0.20   | 1.26   | 0.67   |
| Pgf       | 0.40  | 0.11 | 0.90   | 0.10  | 1.06   | 0.34  | 1.06   | 0.22   | 1.13   | 0.56   |
| B3galt2   | 0.17  | 0.12 | 0.41   | 0.13  | 0.44   | 0.05  | 0.61   | 0.28   | 0.64   | 0.78   |
| Pou6f1    | 2.14  | 0.27 | 2.27   | 0.23  | 3.44   | 0.32  | 4.03   | 1.25   | 4.25   | 0.71   |
| Zc3h6     | 0.96  | 0.02 | 1.53   | 0.10  | 1.59   | 0.38  | 1.98   | 0.34   | 2.07   | 0.11   |
| Kcne4     | 0.27  | 0.22 | 0.34   | 0.13  | 0.57   | 0.16  | 0.64   | 0.29   | 0.66   | 0.40   |
| Erich2    | 0.13  | 0.12 | 0.18   | 0.09  | 0.38   | 0.15  | 0.49   | 0.22   | 0.95   | 0.47   |
| Akr1c13   | 0.55  | 0.31 | 2.49   | 0.92  | 6.04   | 1.13  | 6.38   | 2.17   | 13.21  | 5.97   |
| Fgfbp3    | 4.32  | 0.40 | 4.34   | 0.88  | 6.52   | 1.26  | 7.48   | 1.80   | 7.50   | 2.87   |
| S100a9    | 10.23 | 3.08 | 10.49  | 3.14  | 40.39  | 29.27 | 41.16  | 28.03  | 55.13  | 28.28  |
| Aldh1a1   | 1.29  | 0.13 | 2.55   | 0.50  | 3.46   | 0.62  | 3.48   | 0.61   | 4.20   | 2.27   |
| Tifa      | 0.94  | 0.16 | 1.82   | 0.42  | 2.12   | 0.29  | 2.47   | 0.34   | 2.76   | 0.53   |
| Prfl      | 0.79  | 0.31 | 0.87   | 0.33  | 2.23   | 0.66  | 2.33   | 0.24   | 2.95   | 0.79   |
| Atp13a5   | 0.45  | 0.07 | 1.26   | 0.23  | 1.67   | 0.63  | 1.73   | 0.45   | 1.98   | 0.24   |
| Scgb1a1   | 0.61  | 0.01 | 2.33   | 1.08  | 3.38   | 1.47  | 3.52   | 1.37   | 6.36   | 1.97   |
| Spin2c    | 0.44  | 0.12 | 0.69   | 0.17  | 0.77   | 0.19  | 0.88   | 0.21   | 0.91   | 0.09   |



|               |        |        |         |        |         |        |         |        |         |        |
|---------------|--------|--------|---------|--------|---------|--------|---------|--------|---------|--------|
| 9530057J20Ril | 0.37   | 0.12   | 0.54    | 0.18   | 0.85    | 0.12   | 1.09    | 0.13   | 1.39    | 0.51   |
| Tnfsf18       | 0.40   | 0.24   | 0.43    | 0.15   | 0.46    | 0.18   | 0.53    | 0.08   | 1.11    | 0.77   |
| Phldb2        | 4.43   | 0.71   | 4.46    | 0.49   | 5.73    | 0.80   | 5.80    | 0.42   | 9.43    | 1.80   |
| C3            | 0.76   | 0.08   | 3.83    | 2.05   | 4.63    | 2.14   | 6.81    | 4.29   | 10.00   | 7.91   |
| Prkar2b       | 1.52   | 0.29   | 2.35    | 0.65   | 2.40    | 0.40   | 2.60    | 0.15   | 2.87    | 1.63   |
| Glb1l2        | 0.74   | 0.18   | 1.03    | 0.25   | 1.19    | 0.15   | 1.38    | 0.45   | 2.45    | 2.20   |
| Gm21451       | 0.14   | 0.10   | 0.40    | 0.22   | 0.45    | 0.14   | 0.67    | 0.29   | 0.88    | 0.67   |
| BB114814      | 0.56   | 0.16   | 0.93    | 0.23   | 1.28    | 0.47   | 1.28    | 0.33   | 1.57    | 0.42   |
| Cacng7        | 0.50   | 0.11   | 0.94    | 0.17   | 1.23    | 0.20   | 1.41    | 0.58   | 1.43    | 0.67   |
| Pcp4          | 0.70   | 0.31   | 1.29    | 0.57   | 1.81    | 1.02   | 4.33    | 0.58   | 5.53    | 1.88   |
| Defb6         | 777.88 | 229.02 | 1075.05 | 114.81 | 1327.45 | 289.57 | 1336.90 | 157.63 | 2287.01 | 659.38 |
| Gm38510       | 0.04   | 0.03   | 0.15    | 0.15   | 0.24    | 0.18   | 0.36    | 0.19   | 0.65    | 0.23   |
| Tnip3         | 0.14   | 0.06   | 0.17    | 0.06   | 0.28    | 0.12   | 0.36    | 0.20   | 0.64    | 0.49   |
| Agr1a         | 0.22   | 0.13   | 0.59    | 0.25   | 0.63    | 0.06   | 0.79    | 0.20   | 0.84    | 0.56   |
| 105247125     | 0.16   | 0.04   | 0.33    | 0.08   | 0.46    | 0.23   | 0.56    | 0.33   | 0.64    | 0.38   |
| Tnni3         | 0.92   | 0.23   | 2.33    | 0.21   | 2.54    | 0.44   | 2.81    | 0.58   | 3.24    | 0.78   |
| Amhr2         | 0.31   | 0.14   | 0.49    | 0.16   | 0.97    | 0.27   | 1.41    | 0.25   | 2.44    | 0.65   |
| Zic1          | 0.47   | 0.31   | 1.01    | 0.39   | 1.29    | 0.40   | 1.41    | 0.23   | 1.64    | 1.00   |
| Kcnu1         | 0.18   | 0.05   | 0.32    | 0.10   | 0.34    | 0.12   | 0.48    | 0.25   | 0.53    | 0.09   |
| Slc39a4       | 0.23   | 0.04   | 0.23    | 0.03   | 0.36    | 0.05   | 0.42    | 0.12   | 0.60    | 0.27   |
| B3galnt1      | 0.30   | 0.10   | 0.51    | 0.19   | 0.67    | 0.13   | 0.74    | 0.24   | 0.75    | 0.42   |
| Gm10591       | 2.41   | 1.42   | 3.12    | 1.98   | 3.88    | 1.80   | 5.09    | 1.33   | 9.47    | 5.71   |
| Osbpl7        | 1.87   | 0.23   | 2.99    | 0.19   | 3.20    | 0.59   | 3.24    | 0.56   | 4.14    | 0.57   |
| Flt4          | 0.41   | 0.07   | 0.92    | 0.38   | 1.27    | 0.69   | 1.29    | 0.49   | 1.62    | 0.78   |
| Uba7          | 0.64   | 0.01   | 1.39    | 0.47   | 1.67    | 0.26   | 1.78    | 0.17   | 1.85    | 0.60   |
| Prr16         | 0.33   | 0.11   | 0.64    | 0.20   | 1.09    | 0.32   | 1.37    | 0.41   | 1.38    | 0.81   |
| Mill1         | 10.73  | 0.52   | 15.12   | 4.35   | 27.33   | 8.33   | 29.57   | 7.52   | 31.25   | 12.15  |
| Scube1        | 0.48   | 0.15   | 0.83    | 0.18   | 1.05    | 0.10   | 1.09    | 0.45   | 1.17    | 0.53   |
| Chst10        | 0.10   | 0.04   | 0.19    | 0.04   | 0.39    | 0.11   | 0.51    | 0.11   | 0.57    | 0.28   |
| Ctso          | 1.25   | 0.18   | 2.79    | 0.58   | 2.93    | 0.47   | 3.12    | 0.53   | 3.35    | 0.48   |
| Alx4          | 0.49   | 0.09   | 0.94    | 0.27   | 1.00    | 0.26   | 1.08    | 0.39   | 1.34    | 0.72   |
| Rusc2         | 2.00   | 0.36   | 3.03    | 0.50   | 3.36    | 0.52   | 3.74    | 0.39   | 4.23    | 0.45   |
| Casp4         | 2.37   | 0.30   | 6.30    | 1.12   | 14.54   | 2.54   | 15.46   | 2.37   | 21.02   | 3.94   |
| Akap12        | 0.33   | 0.08   | 0.61    | 0.18   | 0.68    | 0.18   | 0.80    | 0.19   | 0.83    | 0.37   |
| Ccl11         | 0.80   | 0.41   | 4.87    | 1.81   | 5.55    | 3.13   | 7.23    | 2.98   | 9.48    | 6.90   |
| F830045P16Ri  | 1.12   | 0.09   | 1.49    | 0.54   | 2.68    | 0.94   | 3.15    | 1.01   | 3.46    | 1.59   |
| Reck          | 1.26   | 0.28   | 2.60    | 0.54   | 3.36    | 0.74   | 3.71    | 0.66   | 4.31    | 2.39   |
| Cep295nl      | 1.07   | 0.12   | 1.63    | 0.38   | 2.03    | 0.13   | 2.16    | 0.20   | 2.26    | 0.30   |
| Gsta3         | 1.17   | 0.31   | 2.12    | 0.51   | 3.01    | 1.52   | 3.26    | 0.93   | 3.61    | 2.20   |
| Cyp2f2        | 5.53   | 1.98   | 12.17   | 4.47   | 21.04   | 11.59  | 30.18   | 7.32   | 53.18   | 30.18  |
| Sp5           | 0.16   | 0.10   | 0.41    | 0.06   | 0.43    | 0.07   | 0.67    | 0.19   | 0.82    | 0.30   |
| Pced1b        | 0.61   | 0.13   | 1.16    | 0.20   | 1.46    | 0.36   | 1.55    | 0.33   | 1.71    | 0.45   |
| Olfml1        | 0.66   | 0.14   | 0.98    | 0.53   | 1.01    | 0.51   | 1.09    | 0.32   | 1.84    | 1.34   |
| Apol9a        | 0.54   | 0.20   | 0.63    | 0.11   | 1.11    | 0.82   | 1.46    | 0.76   | 2.10    | 0.40   |
| Steap4        | 12.38  | 1.48   | 12.91   | 1.83   | 13.21   | 1.03   | 21.10   | 3.83   | 25.77   | 9.12   |
| C2            | 0.81   | 0.34   | 1.47    | 0.44   | 2.80    | 0.64   | 3.12    | 0.91   | 5.30    | 1.94   |
| Nexn          | 1.07   | 0.21   | 1.70    | 0.30   | 1.71    | 0.18   | 2.33    | 0.10   | 2.60    | 0.51   |

|           |       |      |       |      |       |      |       |       |       |      |
|-----------|-------|------|-------|------|-------|------|-------|-------|-------|------|
| Nlrp1b    | 0.45  | 0.17 | 1.28  | 0.24 | 1.29  | 0.58 | 1.64  | 0.30  | 1.75  | 0.14 |
| Irx6      | 0.04  | 0.05 | 0.31  | 0.10 | 0.32  | 0.19 | 0.45  | 0.20  | 0.58  | 0.24 |
| Nudt16    | 0.58  | 0.09 | 1.17  | 0.34 | 1.25  | 0.19 | 1.36  | 0.23  | 1.37  | 0.27 |
| Cd209a    | 0.35  | 0.18 | 0.89  | 0.19 | 1.20  | 0.51 | 1.73  | 0.93  | 2.17  | 1.91 |
| Tceal3    | 0.58  | 0.14 | 1.03  | 0.20 | 1.18  | 0.30 | 1.23  | 0.30  | 1.45  | 0.33 |
| Serpina3g | 12.73 | 1.22 | 25.46 | 4.85 | 27.75 | 5.47 | 29.78 | 5.51  | 31.45 | 5.01 |
| Tmem106a  | 2.62  | 0.22 | 4.80  | 0.41 | 5.38  | 0.85 | 5.60  | 0.66  | 6.02  | 1.83 |
| Dnaaf3    | 0.98  | 0.10 | 1.88  | 0.13 | 2.31  | 0.28 | 2.60  | 0.25  | 3.18  | 0.26 |
| Cyt1l     | 0.04  | 0.03 | 0.24  | 0.18 | 0.30  | 0.20 | 0.40  | 0.24  | 1.00  | 1.24 |
| Ikzf4     | 0.46  | 0.03 | 0.49  | 0.04 | 0.59  | 0.16 | 0.59  | 0.09  | 1.08  | 0.16 |
| Mgl2      | 1.97  | 0.54 | 3.00  | 0.87 | 4.95  | 2.78 | 6.01  | 1.49  | 7.36  | 5.24 |
| Cd209e    | 0.09  | 0.06 | 0.38  | 0.19 | 0.75  | 0.40 | 0.87  | 0.35  | 2.21  | 2.24 |
| Gm5941    | 0.94  | 0.07 | 1.02  | 0.44 | 1.17  | 0.43 | 1.97  | 0.48  | 5.14  | 1.30 |
| Morn3     | 0.27  | 0.16 | 0.45  | 0.21 | 0.50  | 0.26 | 0.51  | 0.19  | 0.52  | 0.13 |
| Man1a     | 2.51  | 0.67 | 5.09  | 0.40 | 7.10  | 1.03 | 7.15  | 1.78  | 7.33  | 3.78 |
| Mme       | 0.55  | 0.10 | 1.04  | 0.21 | 1.36  | 0.32 | 1.53  | 0.30  | 2.43  | 1.46 |
| Efemp1    | 4.45  | 0.67 | 13.53 | 3.08 | 16.31 | 4.62 | 19.99 | 4.77  | 23.97 | 8.64 |
| Cd180     | 0.19  | 0.07 | 0.36  | 0.19 | 0.38  | 0.14 | 0.43  | 0.15  | 0.53  | 0.41 |
| Abcb1b    | 2.12  | 0.33 | 3.23  | 0.18 | 3.63  | 0.38 | 4.01  | 0.40  | 4.28  | 0.35 |
| Ccl21c    | 2.41  | 1.42 | 3.12  | 1.98 | 3.88  | 1.80 | 5.09  | 1.33  | 9.47  | 5.71 |
| Clca3a1   | 6.56  | 1.29 | 10.49 | 1.83 | 10.69 | 2.59 | 13.62 | 1.92  | 15.99 | 3.27 |
| Otx1      | 0.09  | 0.01 | 0.18  | 0.08 | 0.28  | 0.09 | 0.42  | 0.24  | 0.57  | 0.29 |
| Aoc3      | 1.12  | 0.28 | 1.91  | 0.77 | 2.55  | 0.62 | 2.57  | 0.65  | 4.38  | 4.91 |
| Dpep1     | 1.35  | 0.96 | 3.49  | 1.45 | 4.09  | 1.50 | 4.90  | 2.60  | 6.46  | 4.30 |
| Cuzd1     | 0.36  | 0.11 | 0.37  | 0.15 | 0.88  | 0.23 | 0.97  | 0.43  | 1.36  | 0.29 |
| Lbp       | 0.69  | 0.24 | 2.05  | 0.68 | 4.64  | 2.62 | 5.02  | 2.98  | 6.42  | 3.68 |
| Fn3k      | 0.18  | 0.13 | 0.28  | 0.05 | 0.31  | 0.07 | 0.56  | 0.07  | 0.58  | 0.32 |
| Casp1     | 3.23  | 0.91 | 8.79  | 1.21 | 18.19 | 2.81 | 20.20 | 1.79  | 21.20 | 4.51 |
| Gm13304   | 2.41  | 1.42 | 3.12  | 1.98 | 3.88  | 1.80 | 5.09  | 1.33  | 9.47  | 5.71 |
| Ndp       | 0.32  | 0.10 | 0.53  | 0.06 | 0.62  | 0.19 | 0.68  | 0.08  | 0.69  | 0.40 |
| Svep1     | 0.12  | 0.02 | 0.54  | 0.20 | 0.56  | 0.19 | 0.56  | 0.14  | 0.92  | 0.54 |
| Cd302     | 1.27  | 0.21 | 4.00  | 1.24 | 5.07  | 1.42 | 5.38  | 1.72  | 6.20  | 3.09 |
| Steap2    | 0.21  | 0.06 | 0.55  | 0.06 | 0.71  | 0.06 | 0.87  | 0.19  | 0.94  | 0.09 |
| Cped1     | 0.85  | 0.17 | 2.60  | 0.80 | 2.78  | 0.63 | 3.44  | 0.62  | 3.44  | 1.81 |
| Serpina3i | 12.84 | 1.36 | 19.98 | 4.91 | 21.28 | 8.32 | 22.12 | 4.49  | 30.46 | 6.53 |
| Stx1b     | 0.22  | 0.11 | 0.38  | 0.08 | 0.55  | 0.08 | 0.59  | 0.12  | 0.71  | 0.22 |
| Meiob     | 0.24  | 0.17 | 0.39  | 0.06 | 0.46  | 0.20 | 0.93  | 0.22  | 1.11  | 0.35 |
| Ntn1      | 0.92  | 0.17 | 2.86  | 1.03 | 3.54  | 1.39 | 4.28  | 0.59  | 4.45  | 2.46 |
| Slit2     | 0.19  | 0.01 | 0.63  | 0.19 | 0.68  | 0.14 | 0.80  | 0.14  | 0.97  | 0.60 |
| Emx2      | 0.46  | 0.08 | 1.19  | 0.36 | 1.34  | 0.57 | 1.65  | 0.29  | 1.79  | 0.46 |
| Sfxn5     | 1.69  | 0.09 | 2.74  | 0.42 | 3.01  | 0.67 | 3.27  | 0.73  | 3.56  | 0.29 |
| Unc93a2   | 0.92  | 0.30 | 1.10  | 0.57 | 1.30  | 0.27 | 1.95  | 0.66  | 2.59  | 0.73 |
| Rab11fip4 | 9.74  | 0.22 | 16.22 | 2.66 | 17.09 | 3.06 | 18.38 | 4.44  | 20.26 | 2.26 |
| Adcyap1r1 | 0.04  | 0.03 | 0.11  | 0.07 | 0.19  | 0.09 | 0.28  | 0.05  | 0.66  | 0.51 |
| Kctd12    | 19.36 | 2.91 | 30.81 | 3.02 | 35.40 | 5.89 | 36.71 | 10.75 | 44.65 | 7.31 |
| Apol7a    | 1.04  | 0.18 | 1.41  | 0.30 | 1.88  | 0.63 | 1.99  | 1.19  | 4.29  | 1.26 |
| Calca     | 0.05  | 0.03 | 0.15  | 0.11 | 0.53  | 0.17 | 0.55  | 0.17  | 0.56  | 0.46 |

|           |        |       |        |       |        |       |        |       |        |       |
|-----------|--------|-------|--------|-------|--------|-------|--------|-------|--------|-------|
| Gpnm      | 4.02   | 1.26  | 5.99   | 0.64  | 11.93  | 2.64  | 14.95  | 1.41  | 22.58  | 5.19  |
| Rnf32     | 0.32   | 0.18  | 0.36   | 0.07  | 0.37   | 0.11  | 0.43   | 0.25  | 0.56   | 0.27  |
| Foxred2   | 1.68   | 0.10  | 2.38   | 0.20  | 2.57   | 0.12  | 3.23   | 0.31  | 3.25   | 0.50  |
| Plekha2   | 6.19   | 0.24  | 8.36   | 0.79  | 9.54   | 1.23  | 11.28  | 0.61  | 11.47  | 1.05  |
| Ttc12     | 0.79   | 0.04  | 0.80   | 0.17  | 0.92   | 0.21  | 0.96   | 0.26  | 1.19   | 0.38  |
| Aldoc     | 5.86   | 0.46  | 6.09   | 0.51  | 6.63   | 0.43  | 7.83   | 2.04  | 9.86   | 0.63  |
| Lonrf1    | 1.69   | 0.21  | 1.97   | 0.24  | 2.34   | 0.38  | 2.63   | 0.48  | 2.73   | 0.26  |
| Hivep1    | 6.24   | 0.20  | 7.88   | 0.93  | 8.20   | 0.50  | 8.32   | 1.62  | 9.24   | 1.23  |
| Naa35     | 17.72  | 0.96  | 17.78  | 0.91  | 18.03  | 0.86  | 18.17  | 0.32  | 19.01  | 0.88  |
| Arid1b    | 7.80   | 0.24  | 8.65   | 0.66  | 8.88   | 0.47  | 8.95   | 0.86  | 9.08   | 1.25  |
| Abcc1     | 24.72  | 1.95  | 26.79  | 1.28  | 26.81  | 1.01  | 27.53  | 1.13  | 30.37  | 1.81  |
| Plk2      | 8.96   | 1.33  | 11.35  | 1.04  | 11.89  | 1.24  | 12.82  | 2.58  | 14.29  | 1.45  |
| Zfp606    | 1.41   | 0.26  | 1.74   | 0.08  | 1.76   | 0.26  | 1.79   | 0.18  | 1.96   | 0.34  |
| Ncoa2     | 6.08   | 0.55  | 7.40   | 0.62  | 7.68   | 0.79  | 7.80   | 0.91  | 8.05   | 1.41  |
| Man2b2    | 12.85  | 1.34  | 13.84  | 1.43  | 15.51  | 1.99  | 17.87  | 1.52  | 18.11  | 1.85  |
| Zfp784    | 2.95   | 0.35  | 3.33   | 0.46  | 3.45   | 0.37  | 3.70   | 0.32  | 3.82   | 0.43  |
| Tnfrsf13b | 0.47   | 0.06  | 0.49   | 0.12  | 0.60   | 0.24  | 0.63   | 0.15  | 0.68   | 0.31  |
| Foxj2     | 9.50   | 0.69  | 11.13  | 1.06  | 11.73  | 1.16  | 12.54  | 1.58  | 13.05  | 1.21  |
| Slc25a45  | 2.58   | 0.11  | 3.65   | 0.60  | 3.92   | 0.53  | 4.16   | 0.31  | 4.71   | 0.58  |
| Rcor3     | 6.26   | 0.73  | 6.86   | 0.56  | 7.31   | 1.25  | 7.62   | 1.08  | 7.92   | 0.73  |
| Cyld      | 3.40   | 0.37  | 4.51   | 0.16  | 4.69   | 0.23  | 4.83   | 0.72  | 5.05   | 1.02  |
| Net1      | 86.37  | 5.19  | 96.62  | 7.20  | 114.83 | 11.45 | 117.23 | 13.89 | 118.03 | 10.30 |
| Acadsb    | 11.67  | 1.36  | 11.79  | 0.74  | 12.28  | 1.48  | 12.66  | 1.05  | 13.18  | 1.08  |
| Arl4c     | 18.82  | 1.35  | 21.30  | 1.52  | 24.97  | 1.98  | 27.10  | 0.94  | 27.95  | 2.60  |
| Wasf2     | 32.28  | 2.68  | 34.24  | 1.09  | 35.33  | 0.93  | 35.71  | 4.10  | 40.75  | 3.03  |
| Cryz      | 2.62   | 0.97  | 3.24   | 0.37  | 3.30   | 0.31  | 3.52   | 0.52  | 3.53   | 0.34  |
| Gm1673    | 0.44   | 0.24  | 0.56   | 0.47  | 0.59   | 0.37  | 0.81   | 0.15  | 1.04   | 0.28  |
| Sik1      | 19.92  | 7.21  | 21.58  | 4.15  | 22.46  | 6.06  | 24.51  | 4.82  | 31.13  | 4.29  |
| Tcp1111   | 0.53   | 0.10  | 0.61   | 0.15  | 0.75   | 0.11  | 0.79   | 0.11  | 0.88   | 0.11  |
| Reep3     | 32.46  | 1.25  | 33.06  | 2.75  | 33.99  | 2.80  | 34.58  | 2.39  | 37.47  | 3.00  |
| Zfp984    | 2.04   | 0.31  | 2.99   | 0.36  | 3.23   | 0.50  | 3.64   | 0.70  | 3.66   | 0.68  |
| Mdc1      | 5.57   | 0.83  | 6.60   | 0.48  | 7.09   | 0.50  | 7.47   | 0.48  | 8.39   | 0.91  |
| Ppm1l     | 1.28   | 0.01  | 1.31   | 0.12  | 1.64   | 0.14  | 1.86   | 0.25  | 1.95   | 0.25  |
| Lrrcc1    | 1.79   | 0.29  | 2.01   | 0.12  | 2.04   | 0.62  | 2.17   | 0.17  | 2.21   | 0.66  |
| Cdh4      | 1.63   | 0.24  | 2.28   | 0.37  | 2.57   | 0.76  | 2.87   | 0.15  | 3.67   | 0.40  |
| Srr       | 4.96   | 0.59  | 6.09   | 0.77  | 6.12   | 0.53  | 6.18   | 0.72  | 6.68   | 1.12  |
| Mcm9      | 2.59   | 0.28  | 3.65   | 0.54  | 3.68   | 0.40  | 3.70   | 0.36  | 3.94   | 0.33  |
| Chpt1     | 4.05   | 0.19  | 5.06   | 1.16  | 5.32   | 0.87  | 6.24   | 0.74  | 6.37   | 3.54  |
| Hfe       | 4.06   | 0.60  | 5.20   | 0.82  | 5.24   | 0.76  | 5.32   | 0.39  | 5.35   | 1.48  |
| N4bp2l1   | 3.23   | 0.40  | 3.97   | 1.06  | 4.80   | 1.30  | 5.51   | 0.65  | 5.96   | 1.52  |
| Col17a1   | 332.24 | 25.79 | 389.35 | 25.35 | 407.98 | 46.00 | 453.75 | 55.58 | 483.97 | 56.54 |
| Vim       | 201.34 | 34.02 | 273.32 | 61.43 | 296.93 | 52.65 | 301.84 | 30.10 | 321.73 | 95.01 |
| Smpd13a   | 35.42  | 3.66  | 43.95  | 4.66  | 46.39  | 6.15  | 58.65  | 7.46  | 71.67  | 5.50  |
| Nod2      | 3.66   | 0.61  | 4.10   | 0.47  | 5.52   | 1.27  | 6.21   | 1.64  | 6.79   | 1.83  |
| Gimap1    | 1.89   | 0.07  | 2.43   | 0.28  | 2.49   | 0.37  | 2.61   | 0.18  | 2.99   | 0.45  |
| Dock3     | 0.30   | 0.12  | 0.39   | 0.04  | 0.40   | 0.06  | 0.45   | 0.03  | 0.52   | 0.06  |
| Top1mt    | 8.03   | 0.36  | 11.13  | 0.72  | 11.24  | 0.99  | 11.26  | 0.77  | 11.48  | 1.31  |

|         |       |       |       |      |       |      |       |      |       |       |
|---------|-------|-------|-------|------|-------|------|-------|------|-------|-------|
| Ccdc88a | 0.65  | 0.08  | 0.74  | 0.11 | 0.82  | 0.09 | 0.84  | 0.16 | 0.96  | 0.38  |
| Fbxo32  | 5.60  | 0.25  | 7.50  | 1.09 | 8.57  | 1.50 | 8.69  | 2.54 | 9.56  | 2.23  |
| Bbs7    | 1.36  | 0.36  | 2.00  | 0.23 | 2.01  | 0.25 | 2.23  | 0.34 | 2.32  | 0.37  |
| Arnt2   | 0.58  | 0.16  | 0.67  | 0.09 | 0.70  | 0.14 | 0.84  | 0.03 | 0.93  | 0.26  |
| Zhx3    | 2.53  | 0.24  | 2.78  | 0.30 | 2.94  | 0.37 | 2.95  | 0.47 | 3.53  | 0.60  |
| Zfp3611 | 64.91 | 13.71 | 69.44 | 7.28 | 72.75 | 7.72 | 84.27 | 2.91 | 90.04 | 15.93 |
| Adat3   | 3.00  | 0.49  | 3.99  | 0.48 | 4.07  | 0.63 | 4.24  | 0.47 | 4.46  | 0.93  |
| Ptpn23  | 14.24 | 1.36  | 15.14 | 1.54 | 15.56 | 0.93 | 16.58 | 1.73 | 17.51 | 0.59  |
| Rufy2   | 1.98  | 0.55  | 2.48  | 0.31 | 2.75  | 0.31 | 2.88  | 0.26 | 2.97  | 0.61  |
| Dpy1913 | 0.92  | 0.13  | 1.20  | 0.15 | 1.45  | 0.15 | 1.56  | 0.24 | 1.56  | 0.22  |
| Gsk3b   | 11.81 | 0.35  | 13.06 | 0.39 | 13.77 | 1.32 | 14.16 | 1.78 | 14.25 | 1.86  |
| Tmem127 | 20.51 | 0.84  | 21.91 | 0.81 | 22.75 | 1.39 | 22.80 | 2.48 | 23.43 | 1.30  |
| Ppp1r1a | 0.24  | 0.06  | 0.35  | 0.18 | 0.47  | 0.26 | 0.56  | 0.17 | 0.67  | 0.53  |
| Col4a6  | 3.62  | 0.18  | 3.72  | 0.84 | 4.26  | 0.76 | 4.89  | 1.54 | 5.26  | 0.59  |
| Ssc5d   | 0.61  | 0.12  | 0.64  | 0.18 | 0.77  | 0.26 | 0.77  | 0.08 | 0.95  | 0.52  |
| Dcbld2  | 1.10  | 0.10  | 1.43  | 0.09 | 1.45  | 0.21 | 1.58  | 0.11 | 1.63  | 0.32  |
| Wdr45   | 22.66 | 1.48  | 24.89 | 1.84 | 25.10 | 3.65 | 26.20 | 4.37 | 27.54 | 4.24  |
| Ii1r2   | 43.70 | 3.19  | 43.80 | 7.76 | 57.05 | 7.73 | 65.68 | 8.69 | 79.16 | 8.14  |
| Zfp939  | 1.46  | 0.15  | 1.75  | 0.20 | 1.80  | 0.26 | 1.81  | 0.36 | 1.96  | 0.31  |
| Ii10rb  | 10.17 | 0.20  | 13.06 | 1.27 | 13.26 | 1.07 | 13.78 | 0.67 | 13.80 | 2.23  |
| Cipc    | 15.10 | 1.33  | 19.98 | 1.39 | 20.82 | 2.77 | 21.20 | 2.93 | 22.99 | 4.12  |
| Mcur1   | 16.30 | 1.34  | 17.53 | 1.10 | 18.14 | 1.37 | 18.75 | 1.30 | 20.70 | 1.71  |
| Phf21a  | 6.58  | 0.53  | 8.15  | 0.95 | 8.70  | 1.77 | 9.61  | 1.05 | 9.69  | 1.41  |
| St3gal1 | 2.58  | 0.95  | 3.44  | 0.87 | 4.21  | 1.42 | 4.42  | 2.70 | 4.54  | 2.00  |
| Rab32   | 6.15  | 0.26  | 7.35  | 0.57 | 9.46  | 1.22 | 10.22 | 1.28 | 11.64 | 0.84  |
| Ghr     | 11.42 | 1.54  | 13.26 | 1.31 | 14.23 | 1.73 | 15.16 | 1.70 | 15.45 | 5.36  |
| Nhs11   | 13.34 | 0.76  | 13.82 | 1.80 | 15.28 | 1.52 | 16.67 | 3.52 | 19.84 | 2.27  |
| Plekhh1 | 0.66  | 0.09  | 0.78  | 0.14 | 0.82  | 0.09 | 0.85  | 0.31 | 0.91  | 0.15  |
| Kif13a  | 8.48  | 0.37  | 9.78  | 0.39 | 9.90  | 0.78 | 10.45 | 1.28 | 13.30 | 0.36  |
| Kmt2e   | 18.26 | 0.52  | 19.75 | 2.29 | 19.98 | 1.14 | 21.20 | 2.90 | 25.11 | 3.61  |
| Trim26  | 13.79 | 1.04  | 15.66 | 1.32 | 15.78 | 1.93 | 16.85 | 1.93 | 17.30 | 0.99  |
| Lrp10   | 72.13 | 6.25  | 76.22 | 3.38 | 77.07 | 6.82 | 79.17 | 4.80 | 79.31 | 6.11  |
| Foxn3   | 11.99 | 1.34  | 12.97 | 1.43 | 14.12 | 3.16 | 14.77 | 2.72 | 16.04 | 2.35  |
| Mfap3   | 7.63  | 0.93  | 7.91  | 0.39 | 7.95  | 0.75 | 8.04  | 0.82 | 8.48  | 0.97  |
| Hsf2    | 10.63 | 0.93  | 12.70 | 1.26 | 12.85 | 2.22 | 13.58 | 1.87 | 14.78 | 1.56  |
| Zfp820  | 0.66  | 0.11  | 0.70  | 0.06 | 0.78  | 0.08 | 0.84  | 0.19 | 0.94  | 0.29  |
| Nub1    | 19.54 | 0.44  | 20.90 | 1.34 | 21.76 | 1.46 | 22.20 | 0.97 | 22.44 | 2.28  |
| Ank2    | 0.34  | 0.10  | 0.39  | 0.10 | 0.39  | 0.13 | 0.47  | 0.10 | 0.67  | 0.31  |
| Susd6   | 22.45 | 1.60  | 29.05 | 2.55 | 30.19 | 2.55 | 33.07 | 2.40 | 33.19 | 4.64  |
| Fam168a | 6.08  | 0.48  | 6.55  | 0.47 | 7.06  | 0.61 | 7.32  | 0.93 | 8.46  | 1.60  |
| Shroom4 | 1.76  | 0.14  | 2.39  | 0.30 | 2.49  | 0.34 | 2.57  | 0.44 | 2.59  | 0.26  |
| Ptpn6   | 14.19 | 0.92  | 19.75 | 1.78 | 19.91 | 2.22 | 20.77 | 1.60 | 21.32 | 2.02  |
| Impact  | 8.10  | 2.05  | 10.08 | 0.89 | 10.09 | 1.41 | 10.51 | 0.41 | 11.02 | 1.94  |
| Dnajc11 | 23.47 | 0.94  | 23.96 | 1.23 | 24.45 | 2.38 | 25.13 | 2.01 | 25.72 | 2.26  |
| Xrn1    | 4.09  | 0.56  | 4.36  | 0.30 | 4.40  | 0.49 | 4.52  | 0.40 | 4.74  | 0.54  |
| Trpc1   | 0.52  | 0.08  | 0.66  | 0.07 | 0.88  | 0.16 | 0.91  | 0.19 | 1.06  | 0.16  |
| Ccdc57  | 1.18  | 0.38  | 1.37  | 0.19 | 1.39  | 0.19 | 1.53  | 0.24 | 1.81  | 0.25  |

|          |        |       |        |       |        |       |        |       |        |       |
|----------|--------|-------|--------|-------|--------|-------|--------|-------|--------|-------|
| Trim47   | 13.20  | 1.20  | 14.82  | 2.50  | 15.35  | 1.36  | 15.65  | 1.58  | 18.02  | 2.46  |
| Ahnak2   | 48.00  | 1.35  | 65.15  | 7.56  | 65.81  | 8.64  | 68.03  | 17.65 | 84.79  | 10.57 |
| Atf7ip   | 11.27  | 0.93  | 14.42  | 0.60  | 14.76  | 1.83  | 14.89  | 1.89  | 15.04  | 1.91  |
| Tut4     | 1.65   | 0.36  | 2.19   | 0.27  | 2.21   | 0.31  | 2.48   | 0.24  | 2.61   | 0.51  |
| Pde4c    | 0.81   | 0.25  | 1.08   | 0.27  | 1.26   | 0.25  | 1.27   | 0.22  | 1.31   | 0.20  |
| Akap9    | 3.81   | 0.60  | 4.14   | 0.23  | 4.17   | 0.39  | 4.18   | 0.49  | 4.49   | 0.65  |
| Maneal   | 0.89   | 0.15  | 1.22   | 0.26  | 1.25   | 0.19  | 1.57   | 0.31  | 1.68   | 0.23  |
| Clcn6    | 2.33   | 0.21  | 2.96   | 0.33  | 3.10   | 0.21  | 3.23   | 0.31  | 3.36   | 0.33  |
| Zfp558   | 0.53   | 0.23  | 0.56   | 0.09  | 0.62   | 0.10  | 0.67   | 0.09  | 0.70   | 0.06  |
| Cables2  | 7.53   | 0.49  | 9.37   | 0.50  | 9.76   | 0.66  | 9.89   | 0.82  | 10.50  | 0.46  |
| Kat14    | 8.68   | 0.88  | 9.76   | 0.46  | 9.77   | 0.99  | 10.18  | 1.04  | 10.36  | 0.63  |
| Cyfp2    | 3.96   | 0.15  | 5.24   | 0.58  | 5.82   | 0.29  | 6.09   | 1.19  | 7.05   | 0.54  |
| Atxn1    | 4.49   | 0.81  | 4.82   | 0.18  | 5.11   | 0.64  | 5.27   | 0.25  | 6.95   | 0.81  |
| Srrm1    | 37.48  | 2.00  | 38.97  | 1.10  | 41.03  | 1.24  | 45.12  | 2.70  | 45.20  | 3.35  |
| Ptpdc1   | 2.38   | 0.06  | 2.85   | 0.21  | 3.33   | 0.60  | 3.48   | 0.24  | 3.63   | 0.29  |
| Pomk     | 3.44   | 0.22  | 3.87   | 0.25  | 4.10   | 0.33  | 4.24   | 0.48  | 4.38   | 0.38  |
| Plb1     | 1.86   | 0.13  | 1.86   | 0.43  | 2.30   | 0.49  | 2.65   | 0.34  | 2.86   | 0.58  |
| Ep300    | 7.61   | 0.81  | 9.22   | 0.60  | 9.33   | 0.77  | 9.68   | 1.10  | 9.76   | 1.41  |
| Dcaf5    | 6.12   | 0.39  | 6.47   | 0.39  | 6.66   | 0.29  | 7.15   | 0.47  | 7.71   | 0.62  |
| Ppm1k    | 0.88   | 0.12  | 0.95   | 0.12  | 1.00   | 0.31  | 1.12   | 0.21  | 1.15   | 0.20  |
| Lce11    | 152.71 | 23.19 | 171.17 | 35.71 | 196.35 | 38.79 | 262.12 | 72.63 | 269.96 | 45.03 |
| Poglut1  | 9.51   | 0.93  | 10.71  | 0.56  | 10.99  | 0.92  | 12.30  | 0.95  | 12.38  | 1.01  |
| Kdm4c    | 5.33   | 0.92  | 5.76   | 0.45  | 6.04   | 0.70  | 6.33   | 0.53  | 6.66   | 1.07  |
| Prcp     | 6.36   | 0.41  | 7.30   | 0.43  | 7.72   | 0.64  | 8.16   | 0.91  | 8.25   | 0.61  |
| Spn      | 5.37   | 0.62  | 6.29   | 0.59  | 6.59   | 0.49  | 6.80   | 1.10  | 7.62   | 0.43  |
| Dll1     | 9.88   | 1.34  | 10.79  | 0.92  | 11.86  | 1.82  | 12.28  | 0.76  | 14.78  | 3.12  |
| Cbfa2t3  | 0.84   | 0.10  | 1.11   | 0.23  | 1.21   | 0.17  | 1.22   | 0.05  | 1.36   | 0.51  |
| Vegfb    | 10.46  | 1.35  | 12.32  | 2.26  | 13.34  | 2.35  | 14.11  | 1.99  | 14.26  | 1.46  |
| Olfm1    | 4.61   | 0.98  | 6.76   | 1.79  | 7.41   | 1.67  | 8.15   | 0.67  | 8.33   | 2.73  |
| Arhgap42 | 2.54   | 0.40  | 3.30   | 0.22  | 3.45   | 0.45  | 3.61   | 0.36  | 4.14   | 0.63  |
| Ids      | 8.78   | 0.66  | 9.67   | 0.74  | 10.60  | 0.66  | 12.04  | 2.00  | 15.51  | 2.33  |
| Msh6     | 7.52   | 0.91  | 8.63   | 0.82  | 8.72   | 0.83  | 9.44   | 0.66  | 9.51   | 0.61  |
| Ppp1r3d  | 0.67   | 0.22  | 0.94   | 0.16  | 1.04   | 0.14  | 1.24   | 0.13  | 1.24   | 0.18  |
| Sf1      | 67.64  | 3.34  | 68.32  | 1.99  | 72.39  | 2.46  | 73.83  | 1.85  | 74.43  | 2.72  |
| Dlg5     | 5.42   | 0.54  | 6.13   | 0.29  | 6.19   | 0.50  | 6.90   | 0.76  | 7.44   | 0.55  |
| Ppm1a    | 34.86  | 1.09  | 36.27  | 1.44  | 37.67  | 1.78  | 38.09  | 2.21  | 40.11  | 3.85  |
| Aifm2    | 1.46   | 0.26  | 1.93   | 0.40  | 2.09   | 0.32  | 2.46   | 0.28  | 2.52   | 1.18  |
| Pitpnm2  | 8.71   | 0.80  | 9.63   | 0.79  | 10.66  | 1.25  | 12.57  | 1.48  | 13.83  | 0.98  |
| Rpl39l   | 1.51   | 0.56  | 1.88   | 0.95  | 2.11   | 0.71  | 2.41   | 0.35  | 2.63   | 1.05  |
| Ago1     | 11.79  | 0.29  | 12.81  | 0.57  | 12.93  | 0.90  | 13.94  | 2.32  | 15.45  | 1.61  |
| Mbtps1   | 28.94  | 1.29  | 30.64  | 1.23  | 32.33  | 2.34  | 33.40  | 1.93  | 34.81  | 2.40  |
| Fam129b  | 195.12 | 19.98 | 211.57 | 11.13 | 232.26 | 18.64 | 235.96 | 22.86 | 237.99 | 23.00 |
| Birc2    | 7.47   | 1.39  | 8.06   | 0.43  | 8.67   | 1.14  | 8.76   | 0.44  | 9.39   | 1.19  |
| Abca2    | 6.44   | 0.21  | 8.06   | 0.68  | 8.08   | 0.74  | 8.85   | 1.67  | 9.54   | 0.31  |
| Gm46735  | 0.95   | 0.15  | 1.04   | 0.17  | 1.33   | 0.24  | 1.36   | 0.20  | 1.56   | 0.28  |
| Isoc1    | 28.88  | 3.07  | 29.65  | 1.60  | 31.24  | 2.53  | 31.35  | 3.88  | 31.43  | 4.24  |
| Abi2     | 2.42   | 0.26  | 2.48   | 0.19  | 2.66   | 0.28  | 2.96   | 0.33  | 3.03   | 0.62  |

|          |       |       |       |      |        |       |        |       |        |      |
|----------|-------|-------|-------|------|--------|-------|--------|-------|--------|------|
| S1pr4    | 1.92  | 0.42  | 2.11  | 0.37 | 2.39   | 0.62  | 2.41   | 0.21  | 2.68   | 0.33 |
| Traf3    | 5.17  | 0.31  | 5.62  | 0.48 | 6.11   | 0.33  | 6.35   | 0.33  | 6.50   | 0.62 |
| Hexb     | 23.62 | 2.00  | 25.57 | 1.76 | 27.92  | 2.52  | 28.09  | 3.54  | 30.94  | 3.05 |
| Insl6    | 1.43  | 0.28  | 1.70  | 0.42 | 2.30   | 0.42  | 2.66   | 0.54  | 2.73   | 0.37 |
| Etl4     | 8.12  | 0.36  | 10.41 | 0.64 | 10.57  | 1.36  | 10.98  | 1.51  | 10.98  | 1.59 |
| Psen2    | 2.93  | 0.65  | 3.48  | 0.67 | 4.11   | 0.29  | 4.21   | 0.90  | 4.54   | 0.81 |
| Cdk13    | 9.54  | 0.88  | 10.21 | 0.27 | 10.52  | 1.00  | 10.89  | 0.81  | 10.93  | 0.95 |
| Dsg2     | 6.02  | 0.66  | 6.60  | 0.81 | 8.92   | 1.06  | 9.85   | 1.29  | 11.19  | 0.57 |
| Ift74    | 3.41  | 0.49  | 3.60  | 0.28 | 3.70   | 0.46  | 3.80   | 0.76  | 3.83   | 0.73 |
| Abca4    | 0.21  | 0.06  | 0.28  | 0.03 | 0.38   | 0.10  | 0.47   | 0.14  | 0.50   | 0.14 |
| Inpp5e   | 6.16  | 0.47  | 7.53  | 0.48 | 7.64   | 0.94  | 7.84   | 1.04  | 8.15   | 0.47 |
| Repin1   | 2.90  | 0.19  | 3.64  | 0.59 | 3.71   | 0.56  | 3.83   | 0.28  | 4.46   | 0.59 |
| Unc93b1  | 3.22  | 0.41  | 3.65  | 0.58 | 3.96   | 0.66  | 4.92   | 0.40  | 5.09   | 1.41 |
| Arsb     | 3.16  | 0.58  | 4.54  | 0.19 | 4.56   | 0.36  | 5.18   | 0.53  | 6.29   | 1.48 |
| Fam102a  | 14.52 | 0.86  | 14.57 | 1.41 | 17.74  | 2.19  | 17.79  | 2.35  | 18.04  | 1.24 |
| Slc12a4  | 14.59 | 1.85  | 15.78 | 1.25 | 17.53  | 1.44  | 19.17  | 0.63  | 19.33  | 0.83 |
| Rhobtb1  | 3.86  | 0.64  | 4.12  | 0.78 | 4.40   | 0.70  | 4.72   | 0.85  | 4.96   | 0.53 |
| Gdf10    | 1.40  | 0.30  | 1.71  | 0.40 | 2.08   | 0.64  | 2.49   | 1.24  | 3.25   | 1.75 |
| Nfya     | 10.26 | 0.49  | 12.64 | 1.22 | 12.73  | 0.70  | 12.77  | 1.51  | 13.67  | 1.63 |
| Usp53    | 2.56  | 0.44  | 3.80  | 0.49 | 3.99   | 0.73  | 4.32   | 0.55  | 4.72   | 1.01 |
| Ncor2    | 21.60 | 3.13  | 23.88 | 2.59 | 28.83  | 3.00  | 29.39  | 2.88  | 34.62  | 2.19 |
| BC048403 | 3.94  | 0.22  | 4.21  | 0.25 | 4.36   | 0.22  | 4.42   | 0.42  | 4.73   | 0.32 |
| Rgs10    | 16.76 | 1.06  | 18.79 | 5.13 | 19.61  | 2.45  | 20.37  | 1.94  | 22.48  | 6.32 |
| Crtc1    | 5.32  | 0.91  | 5.43  | 0.70 | 5.48   | 0.56  | 5.92   | 0.57  | 6.53   | 0.27 |
| Zmynd11  | 23.84 | 3.39  | 27.31 | 1.49 | 27.96  | 2.01  | 28.73  | 2.11  | 30.14  | 3.91 |
| Dennd4b  | 1.15  | 0.16  | 1.55  | 0.20 | 1.61   | 0.24  | 1.73   | 0.24  | 1.75   | 0.34 |
| Jag2     | 44.30 | 6.60  | 48.72 | 4.12 | 50.58  | 5.50  | 59.11  | 4.33  | 59.74  | 5.92 |
| Zfp3612  | 96.62 | 20.93 | 98.53 | 7.13 | 122.04 | 16.82 | 124.65 | 24.40 | 128.88 | 9.42 |
| Proser1  | 5.94  | 0.60  | 6.18  | 0.31 | 6.59   | 0.47  | 6.82   | 0.58  | 6.94   | 0.64 |
| Nectin3  | 9.05  | 0.45  | 10.96 | 2.61 | 11.17  | 3.44  | 14.08  | 3.11  | 14.34  | 4.64 |
| Ksr1     | 5.51  | 0.61  | 6.24  | 0.50 | 7.98   | 0.88  | 8.50   | 1.09  | 10.56  | 1.16 |
| Ii11     | 1.31  | 0.10  | 1.35  | 0.15 | 1.37   | 0.44  | 1.47   | 0.41  | 1.93   | 0.21 |
| Tbc1d16  | 2.82  | 0.33  | 3.31  | 0.48 | 3.66   | 0.57  | 3.97   | 1.09  | 4.12   | 0.20 |
| Zfp40    | 0.66  | 0.30  | 0.90  | 0.14 | 1.03   | 0.31  | 1.04   | 0.27  | 1.10   | 0.25 |
| Mapt     | 0.66  | 0.06  | 0.78  | 0.12 | 0.81   | 0.15  | 1.09   | 0.16  | 1.11   | 0.10 |
| Cnot6l   | 11.04 | 1.73  | 11.31 | 0.74 | 11.67  | 1.64  | 11.92  | 1.32  | 12.16  | 1.74 |
| Galnt11  | 5.88  | 0.34  | 6.61  | 0.93 | 7.20   | 0.55  | 7.28   | 0.25  | 8.10   | 0.48 |
| Nsun3    | 3.50  | 0.32  | 3.50  | 0.35 | 3.61   | 0.48  | 4.29   | 0.48  | 4.63   | 0.20 |
| Nudt18   | 11.00 | 1.05  | 11.82 | 1.34 | 12.71  | 1.72  | 14.27  | 2.79  | 14.58  | 1.74 |
| Il6st    | 15.12 | 1.01  | 17.63 | 1.31 | 21.31  | 2.97  | 22.20  | 2.74  | 23.54  | 4.06 |
| St3gal6  | 2.76  | 0.64  | 3.77  | 0.34 | 4.25   | 0.63  | 4.61   | 0.46  | 4.96   | 0.87 |
| Pam      | 16.62 | 0.76  | 21.67 | 1.88 | 23.10  | 0.60  | 24.63  | 2.30  | 25.40  | 2.15 |
| Mfn2     | 15.10 | 0.80  | 17.97 | 0.83 | 19.99  | 1.12  | 20.75  | 1.02  | 20.80  | 0.56 |
| Atp2b4   | 23.31 | 0.61  | 27.30 | 3.18 | 27.93  | 3.16  | 31.36  | 7.06  | 39.86  | 4.53 |
| Bche     | 1.15  | 0.26  | 1.39  | 0.37 | 1.40   | 0.23  | 1.57   | 0.46  | 2.03   | 0.93 |
| Zbtb34   | 1.59  | 0.12  | 1.72  | 0.16 | 1.79   | 0.11  | 1.91   | 0.27  | 1.97   | 0.17 |
| Usp11    | 1.10  | 0.15  | 1.13  | 0.18 | 1.26   | 0.18  | 1.49   | 0.24  | 1.53   | 0.38 |

|           |        |       |        |       |        |        |        |       |        |        |
|-----------|--------|-------|--------|-------|--------|--------|--------|-------|--------|--------|
| Ppp1r3e   | 1.59   | 0.13  | 1.81   | 0.22  | 1.99   | 0.31   | 2.17   | 0.33  | 2.34   | 0.42   |
| Cyp2g1    | 122.62 | 68.32 | 178.77 | 83.66 | 243.75 | 120.25 | 289.95 | 96.77 | 348.21 | 204.40 |
| Llg1l     | 23.12  | 1.78  | 24.44  | 0.57  | 24.60  | 1.71   | 24.66  | 0.93  | 26.09  | 1.34   |
| Parp16    | 2.60   | 0.18  | 2.88   | 0.22  | 3.23   | 0.21   | 3.41   | 0.09  | 3.45   | 0.58   |
| Ifnlr1    | 7.44   | 0.74  | 7.63   | 0.66  | 7.80   | 0.77   | 8.06   | 1.44  | 8.85   | 0.63   |
| Prr3      | 7.43   | 0.34  | 7.63   | 0.51  | 8.46   | 1.13   | 9.03   | 1.20  | 9.08   | 0.97   |
| Mbnl2     | 34.00  | 5.84  | 38.65  | 3.32  | 40.32  | 5.51   | 41.81  | 3.17  | 41.81  | 6.29   |
| Parp4     | 2.54   | 0.17  | 3.80   | 0.38  | 4.57   | 0.15   | 4.63   | 0.66  | 4.90   | 0.79   |
| Sun1      | 31.92  | 1.43  | 34.63  | 1.95  | 36.63  | 3.38   | 36.75  | 4.04  | 38.73  | 2.97   |
| Unc79     | 0.37   | 0.01  | 0.49   | 0.12  | 0.66   | 0.12   | 0.78   | 0.18  | 0.91   | 0.16   |
| Fam172a   | 13.74  | 1.35  | 16.24  | 1.18  | 16.43  | 2.48   | 16.82  | 0.97  | 17.12  | 1.63   |
| Bicra     | 7.58   | 0.46  | 7.63   | 0.49  | 7.72   | 0.71   | 8.51   | 0.78  | 8.84   | 0.50   |
| Elf1      | 16.23  | 0.64  | 17.09  | 0.91  | 18.53  | 1.78   | 19.04  | 1.79  | 19.25  | 2.05   |
| Ncoa6     | 7.19   | 0.49  | 8.12   | 0.48  | 8.36   | 0.38   | 8.48   | 1.44  | 9.39   | 1.20   |
| Ncoa1     | 5.72   | 0.33  | 6.80   | 0.26  | 6.84   | 0.48   | 7.27   | 0.98  | 7.40   | 1.02   |
| Socs7     | 4.43   | 0.36  | 5.11   | 0.50  | 5.41   | 0.54   | 5.66   | 0.95  | 6.08   | 0.56   |
| Atg2a     | 14.67  | 1.51  | 14.92  | 0.97  | 15.03  | 1.94   | 15.46  | 2.48  | 17.61  | 1.23   |
| Celf4     | 1.80   | 0.27  | 2.41   | 0.25  | 2.57   | 0.54   | 2.70   | 0.35  | 2.84   | 0.31   |
| Ngfr      | 9.87   | 0.58  | 10.54  | 1.56  | 11.38  | 4.35   | 16.83  | 4.48  | 17.31  | 3.49   |
| Ppp6r3    | 19.72  | 0.35  | 20.46  | 0.38  | 20.67  | 0.73   | 20.98  | 1.16  | 21.30  | 0.69   |
| Gatad2b   | 11.42  | 0.52  | 12.06  | 0.53  | 12.52  | 0.90   | 12.92  | 1.45  | 13.32  | 1.04   |
| Gtf3c3    | 3.66   | 0.47  | 4.04   | 0.18  | 4.15   | 0.36   | 4.21   | 0.28  | 4.22   | 0.35   |
| Smarcd1   | 9.07   | 0.94  | 9.98   | 0.68  | 10.28  | 0.94   | 10.43  | 0.46  | 10.51  | 0.61   |
| Sh2d4a    | 13.09  | 2.51  | 14.36  | 1.02  | 15.23  | 2.24   | 15.42  | 1.84  | 18.95  | 1.77   |
| Ppip5k1   | 5.96   | 0.26  | 6.48   | 0.77  | 6.76   | 1.01   | 7.56   | 1.37  | 7.64   | 0.72   |
| Fam20a    | 0.82   | 0.11  | 1.12   | 0.48  | 1.32   | 0.17   | 1.45   | 0.22  | 1.53   | 0.41   |
| Lamb3     | 43.51  | 4.87  | 47.73  | 3.38  | 49.50  | 9.66   | 51.15  | 7.73  | 53.40  | 8.84   |
| Gm15411   | 5.70   | 0.78  | 7.44   | 0.55  | 8.50   | 1.09   | 8.83   | 2.14  | 9.61   | 1.07   |
| Wfikkn1   | 0.66   | 0.05  | 0.68   | 0.13  | 0.70   | 0.19   | 0.89   | 0.26  | 0.92   | 0.17   |
| Bid       | 2.33   | 0.64  | 2.43   | 0.39  | 2.92   | 0.46   | 3.27   | 0.85  | 3.64   | 0.53   |
| Csrnp2    | 2.64   | 0.43  | 3.27   | 0.76  | 3.81   | 1.01   | 4.14   | 0.85  | 4.66   | 0.46   |
| Ptpn14    | 11.36  | 1.37  | 13.73  | 1.78  | 15.01  | 3.55   | 16.86  | 4.47  | 20.34  | 4.07   |
| Rcbtb1    | 2.99   | 0.38  | 3.88   | 0.51  | 3.93   | 0.43   | 4.20   | 0.29  | 4.23   | 0.69   |
| Myo6      | 10.39  | 1.02  | 11.83  | 0.47  | 12.14  | 1.73   | 12.79  | 1.70  | 14.04  | 1.20   |
| Tshz3     | 0.59   | 0.14  | 0.87   | 0.29  | 1.10   | 0.08   | 1.31   | 0.06  | 1.55   | 0.35   |
| Gadd45b   | 17.45  | 0.90  | 18.04  | 2.29  | 18.91  | 1.32   | 19.70  | 2.08  | 24.23  | 2.30   |
| Sppl2a    | 15.94  | 1.92  | 18.30  | 1.06  | 19.24  | 2.15   | 19.89  | 1.90  | 20.08  | 2.50   |
| Atp8a1    | 3.62   | 0.50  | 3.80   | 0.67  | 3.82   | 0.42   | 3.94   | 0.75  | 4.13   | 1.52   |
| Fads2     | 1.81   | 0.15  | 2.07   | 0.64  | 2.12   | 0.38   | 2.34   | 0.32  | 2.74   | 0.93   |
| Gm3045    | 0.77   | 0.15  | 1.02   | 0.10  | 1.18   | 0.25   | 1.22   | 0.24  | 1.40   | 0.18   |
| Serpina3m | 0.64   | 0.11  | 0.94   | 0.31  | 1.14   | 0.20   | 1.38   | 0.47  | 1.63   | 0.28   |
| Fam129c   | 0.73   | 0.08  | 0.90   | 0.37  | 0.96   | 0.15   | 1.11   | 0.20  | 1.26   | 0.21   |
| Kcnj16    | 1.52   | 0.24  | 2.13   | 0.65  | 2.26   | 0.65   | 2.63   | 0.76  | 2.76   | 0.58   |
| Nrp2      | 4.46   | 0.44  | 5.54   | 1.41  | 5.89   | 1.03   | 6.14   | 0.76  | 6.98   | 3.12   |
| Ermard    | 5.12   | 0.82  | 6.66   | 1.12  | 6.69   | 0.72   | 6.98   | 0.79  | 7.11   | 0.65   |
| Zfp687    | 6.23   | 0.18  | 6.32   | 0.31  | 6.72   | 0.52   | 7.01   | 0.58  | 7.19   | 0.52   |
| Man2a2    | 10.57  | 0.57  | 11.84  | 1.99  | 11.90  | 1.27   | 12.63  | 1.02  | 15.97  | 3.41   |

|           |       |      |       |      |       |      |       |      |       |      |
|-----------|-------|------|-------|------|-------|------|-------|------|-------|------|
| Cd209c    | 2.93  | 0.93 | 3.68  | 0.58 | 3.69  | 0.47 | 3.72  | 0.72 | 3.97  | 0.80 |
| Acp2      | 4.24  | 0.35 | 6.04  | 0.64 | 6.23  | 0.35 | 6.40  | 0.33 | 6.45  | 1.13 |
| Tfcp2     | 2.74  | 0.32 | 3.49  | 0.54 | 3.68  | 0.28 | 3.99  | 0.30 | 4.37  | 0.23 |
| Cluap1    | 9.39  | 0.76 | 9.61  | 0.63 | 9.82  | 0.66 | 10.06 | 0.53 | 10.43 | 0.82 |
| Tshz2     | 3.17  | 0.08 | 3.82  | 0.80 | 3.83  | 0.54 | 4.19  | 0.84 | 4.59  | 1.07 |
| Rnf44     | 28.54 | 1.34 | 32.51 | 0.59 | 35.33 | 1.94 | 35.37 | 3.08 | 35.43 | 1.50 |
| Iigp1     | 0.95  | 0.27 | 1.36  | 0.55 | 1.73  | 0.53 | 1.88  | 0.54 | 1.90  | 1.22 |
| Atat1     | 3.97  | 0.30 | 5.45  | 0.81 | 5.51  | 0.68 | 6.41  | 1.11 | 6.73  | 0.79 |
| Sh2b3     | 7.04  | 0.41 | 8.58  | 0.87 | 9.03  | 0.47 | 9.78  | 1.05 | 9.99  | 1.36 |
| Tpbgl     | 0.66  | 0.06 | 0.92  | 0.25 | 1.03  | 0.20 | 1.14  | 0.19 | 1.31  | 0.37 |
| Ndst2     | 9.01  | 0.70 | 9.36  | 0.77 | 10.24 | 0.68 | 10.27 | 0.64 | 10.29 | 0.61 |
| Phf21b    | 0.88  | 0.23 | 1.03  | 0.26 | 1.10  | 0.19 | 1.31  | 0.17 | 1.32  | 0.11 |
| Pan3      | 11.79 | 2.26 | 13.94 | 1.14 | 14.21 | 2.04 | 14.80 | 2.50 | 15.34 | 1.53 |
| Trmt9b    | 1.15  | 0.12 | 1.29  | 0.45 | 1.44  | 0.27 | 1.70  | 0.46 | 2.03  | 0.29 |
| AI464131  | 1.70  | 0.35 | 1.95  | 0.42 | 2.02  | 0.43 | 2.33  | 0.38 | 2.67  | 0.91 |
| Znrf1     | 15.32 | 1.52 | 15.65 | 2.80 | 17.62 | 2.61 | 18.56 | 2.41 | 21.28 | 1.43 |
| Abl1      | 8.95  | 1.13 | 10.58 | 0.74 | 10.79 | 0.39 | 11.29 | 0.71 | 11.44 | 1.23 |
| Serpina3f | 3.11  | 0.31 | 4.28  | 0.99 | 5.16  | 1.67 | 5.40  | 0.97 | 7.33  | 1.43 |
| Mmgt2     | 5.11  | 0.67 | 5.58  | 0.46 | 6.97  | 0.68 | 7.72  | 0.52 | 9.36  | 1.63 |
| Cherp     | 22.63 | 1.00 | 22.89 | 0.88 | 24.78 | 1.24 | 24.99 | 1.52 | 25.24 | 2.26 |
| Tpmt      | 1.85  | 0.66 | 2.33  | 0.24 | 2.40  | 0.42 | 2.43  | 0.15 | 2.48  | 0.51 |
| Prrc2a    | 63.92 | 5.27 | 63.94 | 2.50 | 64.60 | 4.13 | 66.92 | 5.11 | 72.66 | 4.27 |
| Fam76a    | 11.13 | 0.23 | 14.15 | 1.06 | 14.38 | 1.18 | 15.48 | 1.71 | 15.79 | 1.60 |
| Cyp2j6    | 15.67 | 2.18 | 15.86 | 1.16 | 16.62 | 2.08 | 19.40 | 3.69 | 22.07 | 1.06 |



Table S3

| <b>2 months vs. 1 month old</b> |                                  |  |                             |                |
|---------------------------------|----------------------------------|--|-----------------------------|----------------|
| <b>GO_P Term I</b>              | <b>GO_P Term Level2</b>          |  | <b>Number of Term Genes</b> | <b>Q value</b> |
| GO:0010466                      | metabolic process                |  | 7                           | 0.0220         |
| GO:0018149                      | metabolic process                |  | 5                           | 0.0220         |
| GO:0021893                      | developmental process            |  | 2                           | 0.0220         |
| GO:0050706                      | regulation of biological process |  | 2                           | 0.0220         |
| GO:1902871                      | developmental process            |  | 2                           | 0.0220         |
| GO:0021882                      | developmental process            |  | 2                           | 0.0371         |
| GO:0042475                      | developmental process            |  | 5                           | 0.0391         |
| GO:0006508                      | metabolic process                |  | 15                          | 0.0396         |
| GO:0031424                      | developmental process            |  | 5                           | 0.0396         |
| GO:0021892                      | multicellular organismal process |  | 2                           | 0.0443         |
| GO:0010463                      | cell proliferation               |  | 2                           | 0.0480         |
| GO:0010951                      | metabolic process                |  | 7                           | 0.0480         |
| GO:0021522                      | developmental process            |  | 3                           | 0.0480         |
| GO:0021544                      | multicellular organismal process |  | 2                           | 0.0480         |
| GO:0042481                      | developmental process            |  | 2                           | 0.0480         |
| GO:0043587                      | developmental process            |  | 2                           | 0.0480         |
| GO:0045987                      | regulation of biological process |  | 3                           | 0.0480         |

| <b>6 months vs. 2 month old</b> |                         |  |                             |                |
|---------------------------------|-------------------------|--|-----------------------------|----------------|
| <b>GO_P Term I</b>              | <b>GO_P Term Level2</b> |  | <b>Number of Term Genes</b> | <b>Q value</b> |
| GO:0048511                      | rhythmic process        |  | 6                           | 0.0017         |

| <b>12 months vs. 6 month old</b> |                                  |  |                             |                |
|----------------------------------|----------------------------------|--|-----------------------------|----------------|
| <b>GO_P Term I</b>               | <b>GO_P Term Level2</b>          |  | <b>Number of Term Genes</b> | <b>Q value</b> |
| GO:0002462                       | developmental process            |  | 1                           | 0.0150026      |
| GO:0006006                       | metabolic process                |  | 3                           | 0.0150026      |
| GO:0009444                       | metabolic process                |  | 1                           | 0.0150026      |
| GO:0010906                       | metabolic process                |  | 2                           | 0.0150026      |
| GO:0031179                       | metabolic process                |  | 1                           | 0.0150026      |
| GO:0033034                       | regulation of biological process |  | 1                           | 0.0150026      |
| GO:0034612                       | response to stimulus             |  | 2                           | 0.0150026      |
| GO:0038097                       | immune system process            |  | 1                           | 0.0150026      |
| GO:0042108                       | regulation of biological process |  | 1                           | 0.0150026      |
| GO:0042593                       | biological regulation            |  | 3                           | 0.0150026      |
| GO:0042594                       | response to stimulus             |  | 2                           | 0.0150026      |
| GO:0045089                       | regulation of biological process |  | 2                           | 0.0150026      |
| GO:0048160                       | reproduction                     |  | 1                           | 0.0150026      |
| GO:0048661                       | regulation of biological process |  | 3                           | 0.0150026      |
| GO:0051482                       | regulation of biological process |  | 2                           | 0.0150026      |
| GO:0070994                       | response to stimulus             |  | 1                           | 0.0150026      |

|            |                                  |   |            |
|------------|----------------------------------|---|------------|
| GO:0090317 | regulation of biological process | 1 | 0.0150026  |
| GO:2000108 | biological regulation            | 1 | 0.0150026  |
| GO:2000399 | regulation of biological process | 1 | 0.0150026  |
| GO:2000415 | regulation of biological process | 1 | 0.0150026  |
| GO:2000478 | developmental process            | 1 | 0.0150026  |
| GO:2000534 | regulation of biological process | 1 | 0.0150026  |
| GO:2000590 | developmental process            | 1 | 0.0150026  |
| GO:0009617 | response to stimulus             | 3 | 0.01724409 |
| GO:0010565 | metabolic process                | 1 | 0.01724409 |
| GO:0014823 | response to stimulus             | 2 | 0.01724409 |
| GO:0019543 | metabolic process                | 1 | 0.01724409 |
| GO:0032633 | multicellular organismal process | 1 | 0.01724409 |
| GO:0032765 | regulation of biological process | 1 | 0.01724409 |
| GO:0042700 | response to stimulus             | 1 | 0.01724409 |
| GO:0043406 | metabolic process                | 2 | 0.01724409 |
| GO:0045923 | metabolic process                | 1 | 0.01724409 |
| GO:0046327 | metabolic process                | 1 | 0.01724409 |
| GO:0061402 | metabolic process                | 1 | 0.01724409 |
| GO:0070543 | response to stimulus             | 1 | 0.01724409 |
| GO:0071320 | response to stimulus             | 2 | 0.01724409 |
| GO:1901750 | metabolic process                | 1 | 0.01724409 |
| GO:2000309 | regulation of biological process | 1 | 0.01724409 |
| GO:2000418 | immune system process            | 1 | 0.01724409 |
| GO:2000584 | regulation of biological process | 1 | 0.01724409 |
| GO:0001550 | reproduction                     | 1 | 0.02248066 |
| GO:0015770 | localization                     | 1 | 0.02248066 |
| GO:0045715 | metabolic process                | 1 | 0.02248066 |
| GO:0098971 | localization                     | 1 | 0.02248066 |
| GO:1900625 | biological adhesion              | 1 | 0.02248066 |
| GO:1904640 | response to stimulus             | 1 | 0.02248066 |
| GO:0001865 | developmental process            | 1 | 0.02650196 |
| GO:0006475 | metabolic process                | 1 | 0.02650196 |
| GO:0031503 | localization                     | 1 | 0.02650196 |
| GO:0042304 | metabolic process                | 1 | 0.02650196 |
| GO:0045860 | metabolic process                | 2 | 0.02650196 |
| GO:0051365 | response to stimulus             | 1 | 0.02650196 |
| GO:0010510 | metabolic process                | 1 | 0.02732917 |
| GO:0019344 | metabolic process                | 1 | 0.02732917 |
| GO:0042745 | rhythmic process                 | 1 | 0.02732917 |
| GO:0043434 | response to stimulus             | 2 | 0.02732917 |
| GO:0046320 | metabolic process                | 1 | 0.02732917 |
| GO:0048133 | developmental process            | 1 | 0.02732917 |
| GO:0060005 | response to stimulus             | 1 | 0.02732917 |

|            |                                       |   |            |
|------------|---------------------------------------|---|------------|
| GO:0070741 | response to stimulus                  | 1 | 0.02732917 |
| GO:0071376 | response to stimulus                  | 1 | 0.02732917 |
| GO:2000467 | biological regulation                 | 1 | 0.02732917 |
| GO:2000481 | metabolic process                     | 1 | 0.02732917 |
| GO:0002682 | regulation of biological process      | 1 | 0.0286808  |
| GO:0006751 | metabolic process                     | 1 | 0.0286808  |
| GO:0016310 | metabolic process                     | 4 | 0.0286808  |
| GO:0045650 | developmental process                 | 1 | 0.0286808  |
| GO:0051138 | developmental process                 | 1 | 0.0286808  |
| GO:0070245 | positive regulation of biological pro | 1 | 0.0286808  |
| GO:0071332 | response to stimulus                  | 1 | 0.0286808  |
| GO:0072675 | developmental process                 | 1 | 0.0286808  |
| GO:1904753 | regulation of biological process      | 1 | 0.0286808  |
| GO:0002693 | immune system process                 | 1 | 0.02901137 |
| GO:0006954 | response to stimulus                  | 3 | 0.02901137 |
| GO:0007623 | rhythmic process                      | 2 | 0.02901137 |
| GO:0009744 | response to stimulus                  | 1 | 0.02901137 |
| GO:0032869 | response to stimulus                  | 2 | 0.02901137 |
| GO:0045124 | regulation of biological process      | 1 | 0.02901137 |
| GO:0051151 | developmental process                 | 1 | 0.02901137 |
| GO:0071870 | response to stimulus                  | 1 | 0.02901137 |
| GO:0072126 | developmental process                 | 1 | 0.02901137 |
| GO:1900121 | biological regulation                 | 1 | 0.02901137 |
| GO:1903208 | negative regulation of biological pro | 1 | 0.02901137 |
| GO:0046321 | metabolic process                     | 1 | 0.03056128 |
| GO:0048729 | developmental process                 | 1 | 0.03056128 |
| GO:0048752 | developmental process                 | 1 | 0.03056128 |
| GO:0051775 | response to stimulus                  | 1 | 0.03056128 |
| GO:0061469 | regulation of biological process      | 1 | 0.03056128 |
| GO:0071456 | response to stimulus                  | 2 | 0.03056128 |
| GO:2000391 | regulation of biological process      | 1 | 0.03056128 |
| GO:0006750 | metabolic process                     | 1 | 0.03325518 |
| GO:0009299 | metabolic process                     | 1 | 0.03325518 |
| GO:0030853 | developmental process                 | 1 | 0.03325518 |
| GO:0035726 | cell proliferation                    | 1 | 0.03434595 |
| GO:0043534 | multicellular organismal process      | 1 | 0.03434595 |
| GO:0044320 | response to stimulus                  | 1 | 0.03434595 |
| GO:0045741 | regulation of biological process      | 1 | 0.03434595 |
| GO:0048660 | cell proliferation                    | 1 | 0.03434595 |
| GO:0051897 | regulation of biological process      | 2 | 0.03434595 |
| GO:2000253 | behavior                              | 1 | 0.03434595 |
| GO:0008285 | regulation of biological process      | 3 | 0.03615018 |
| GO:0010642 | regulation of biological process      | 1 | 0.03630871 |

|            |                                       |   |            |
|------------|---------------------------------------|---|------------|
| GO:0010745 | developmental process                 | 1 | 0.03630871 |
| GO:0045410 | metabolic process                     | 1 | 0.03630871 |
| GO:0002675 | regulation of biological process      | 1 | 0.03643594 |
| GO:0006090 | metabolic process                     | 1 | 0.03643594 |
| GO:0010828 | positive regulation of biological pro | 1 | 0.03643594 |
| GO:0034383 | multicellular organismal process      | 1 | 0.03643594 |
| GO:0035137 | developmental process                 | 1 | 0.03643594 |
| GO:0043303 | localization                          | 1 | 0.03643594 |
| GO:0071377 | response to stimulus                  | 1 | 0.03643594 |
| GO:0071639 | regulation of biological process      | 1 | 0.03643594 |
| GO:0071872 | response to stimulus                  | 1 | 0.03643594 |
| GO:0002430 | regulation of biological process      | 1 | 0.03715056 |
| GO:0010739 | regulation of biological process      | 1 | 0.03715056 |
| GO:0030728 | reproduction                          | 1 | 0.03715056 |
| GO:0031953 | metabolic process                     | 1 | 0.03715056 |
| GO:0033089 | developmental process                 | 1 | 0.03715056 |
| GO:0034115 | developmental process                 | 1 | 0.03715056 |
| GO:0035136 | developmental process                 | 1 | 0.03715056 |
| GO:0002523 | immune system process                 | 1 | 0.03838815 |
| GO:0006107 | metabolic process                     | 1 | 0.03838815 |
| GO:0007143 | reproduction                          | 1 | 0.03838815 |
| GO:0042438 | metabolic process                     | 1 | 0.03838815 |
| GO:2001020 | regulation of biological process      | 1 | 0.03838815 |
| GO:0001823 | developmental process                 | 1 | 0.03863622 |
| GO:0010804 | regulation of biological process      | 1 | 0.03863622 |
| GO:0010951 | metabolic process                     | 2 | 0.03863622 |
| GO:0022407 | biological adhesion                   | 1 | 0.03863622 |
| GO:0032609 | multicellular organismal process      | 1 | 0.03863622 |
| GO:0046888 | regulation of biological process      | 1 | 0.03863622 |
| GO:0050805 | regulation of biological process      | 1 | 0.03863622 |
| GO:2000811 | regulation of biological process      | 1 | 0.03863622 |
| GO:0043524 | negative regulation of biological pro | 2 | 0.03935274 |
| GO:0010875 | regulation of biological process      | 1 | 0.0396983  |
| GO:0043616 | cell proliferation                    | 1 | 0.0396983  |
| GO:0048066 | pigmentation                          | 1 | 0.0396983  |
| GO:2000279 | metabolic process                     | 1 | 0.0396983  |
| GO:0032270 | metabolic process                     | 1 | 0.04097016 |
| GO:0051044 | cellular process                      | 1 | 0.04097016 |
| GO:0061036 | developmental process                 | 1 | 0.04097016 |
| GO:0070365 | developmental process                 | 1 | 0.04097016 |
| GO:0007202 | biological regulation                 | 1 | 0.04216991 |
| GO:0043551 | metabolic process                     | 1 | 0.04216991 |
| GO:0050765 | regulation of biological process      | 1 | 0.04216991 |

|            |                                  |   |            |
|------------|----------------------------------|---|------------|
| GO:1903204 | regulation of biological process | 1 | 0.04216991 |
| GO:0006536 | metabolic process                | 1 | 0.04301656 |
| GO:0019395 | metabolic process                | 1 | 0.04301656 |
| GO:0032496 | response to stimulus             | 2 | 0.04301656 |
| GO:1904706 | regulation of biological process | 1 | 0.04301656 |
| GO:1904754 | locomotion                       | 1 | 0.04301656 |
| GO:0045670 | developmental process            | 1 | 0.04466566 |
| GO:0070208 | cellular process                 | 1 | 0.04466566 |
| GO:0006165 | metabolic process                | 1 | 0.04626994 |
| GO:2000406 | immune system process            | 1 | 0.04626994 |
| GO:0001556 | developmental process            | 1 | 0.04752841 |
| GO:0045333 | cellular process                 | 1 | 0.04752841 |
| GO:0045778 | regulation of biological process | 1 | 0.04752841 |

### 20 months vs. 12 month old

| GO_P Term I | GO_P Term Level2                 | Number of Term Genes | Q value |
|-------------|----------------------------------|----------------------|---------|
| GO:0018149  | metabolic process                | 8                    | 0.0000  |
| GO:0030216  | developmental process            | 9                    | 0.0000  |
| GO:0061844  | immune system process            | 8                    | 0.0003  |
| GO:0001503  | multicellular organismal process | 8                    | 0.0004  |
| GO:0010469  | regulation of biological process | 14                   | 0.0022  |
| GO:0071805  | localization                     | 8                    | 0.0022  |
| GO:0001878  | response to stimulus             | 3                    | 0.0038  |
| GO:0031640  | cell killing                     | 4                    | 0.0084  |
| GO:0001958  | developmental process            | 4                    | 0.0099  |
| GO:0006811  | localization                     | 15                   | 0.0100  |
| GO:0030431  | multicellular organismal process | 3                    | 0.0100  |
| GO:0002523  | locomotion                       | 3                    | 0.0140  |
| GO:0045079  | metabolic process                | 2                    | 0.0144  |
| GO:0032496  | response to stimulus             | 8                    | 0.0153  |
| GO:0009612  | response to stimulus             | 5                    | 0.0204  |
| GO:0044140  | regulation of biological process | 2                    | 0.0219  |
| GO:0071799  | response to stimulus             | 2                    | 0.0219  |
| GO:0008544  | developmental process            | 5                    | 0.0245  |
| GO:0009611  | response to stimulus             | 5                    | 0.0245  |
| GO:0070098  | regulation of biological process | 5                    | 0.0275  |
| GO:0042391  | biological regulation            | 6                    | 0.0275  |
| GO:0090131  | multicellular organismal process | 2                    | 0.0281  |
| GO:0006813  | localization                     | 6                    | 0.0329  |
| GO:0010574  | regulation of biological process | 2                    | 0.0329  |
| GO:0016338  | biological adhesion              | 3                    | 0.0329  |
| GO:0036006  | response to stimulus             | 2                    | 0.0329  |
| GO:0044130  | regulation of biological process | 3                    | 0.0329  |

|            |                                  |   |        |
|------------|----------------------------------|---|--------|
| GO:0098700 | localization                     | 2 | 0.0329 |
| GO:0030593 | immune system process            | 5 | 0.0372 |
| GO:0045109 | cellular process                 | 3 | 0.0372 |
| GO:0051971 | regulation of biological process | 2 | 0.0414 |
| GO:0007613 | behavior                         | 5 | 0.0493 |
| GO:0015670 | response to stimulus             | 2 | 0.0493 |
| GO:0042744 | metabolic process                | 3 | 0.0493 |
| GO:0048821 | developmental process            | 3 | 0.0493 |
| GO:0060326 | locomotion                       | 5 | 0.0493 |
